# Supplementary material
Source: publisher figshare collection journal article supplement (https://acs.figshare.com/ndownloader/files/4722889)

# Catalytic Conjugate Addition of Allyl Groups to Styryl-Activated Enones

Joshua D. Sieber, Shubin Liu<sup>1</sup>, and James P. Morken\*

*Department of Chemistry, Merkert Chemistry Center, Boston College, Chestnut Hill, MA 02467*

*<sup>1</sup>Scientific Computing Center, University of North Carolina, Chapel Hill, NC 27599*

## Supplementary Material

**General.** Melting points were determined using a Mel-Temp II melting point apparatus and are uncorrected. <sup>1</sup>H NMR spectra were recorded on Bruker DRX 300 or 400 MHz spectrometers or a Gemini-400 (400 MHz) spectrometer. Chemical shifts are reported in ppm from tetramethylsilane with the solvent resonance as the internal standard (CDCl<sub>3</sub>: 7.24 ppm). Data are reported as follows: chemical shift, integration, multiplicity (s = singlet, d = doublet, t = triplet, q = quartet, p = pentet, h = hexet, br = broad, m = multiplet), and coupling constants (Hz). <sup>13</sup>C NMR was recorded using a Bruker 400 MHz (100 MHz) instrument, a Gemini-400 (100 MHz) instrument, or a Gemini-500 (125 MHz) instrument with complete proton decoupling. Chemical shifts are reported in ppm from tetramethylsilane with the solvent as the internal standard (CDCl<sub>3</sub>: 77.0 ppm). Low-resolution mass spectrometry was performed by the University of North Carolina, Department of Chemistry Mass Spectrometry Facility. Infrared (IR) spectra were obtained on a Nicolet 560 Magna-FTIR.

Liquid chromatography was performed using forced flow (flash chromatography) on silica gel (SiO<sub>2</sub>, 40-63 μm) purchased from SiliCycle. Thin layer chromatography was performed on 250 μm silica gel plates from EMD Chemicals Inc. Visualization was achieved using UV light, phosphomolybdic acid in ethanol, or potassium permanganate in water, each followed by heating.

Analytical supercritical fluid chromatography (SFC) was performed on a Berger Instruments supercritical chromatograph equipped with an Alcott autosampler and a Knauer UV detector.

All reactions were conducted in oven or flame dried glassware under an inert atmosphere of nitrogen or argon. Anhydrous THF, used in reactions that were prepared in a dry-box, was purchased from Aldrich Chemical Company. For all other reactions prepared outside of a dry-box, THF that was freshly distilled from Na metal and benzophenone was used. Tris(dibenzylideneacetone)dipalladium, Bis(1,5-cyclooctadiene)nickel, and tricyclohexylphosphine were purchased from Strem Chemical Company. Allylboronic acid pinacol ester was purchased from Aldrich Chemical Company and distilled through a 6 inch Vigreux column (58-62 °C at 20 torr) and stored in the freezer under Ar. The styryl-activated substrates were synthesized by addition of the desired vinyl lithium reagent, prepared by Li-halogen exchange of the corresponding vinyl iodide or bromide, to *N*-methoxy-*N*-methylcinnamide at low temperature and is described below. *N*-Methoxy-*N*-methylcinnamide was synthesized according to the literature (Hiyama, T.; Reddy, G. B.; Minami, T.; Hanamoto, T. *Bull. Chem. Soc. Jpn.* **1995**, 68, 350.). 1-Iododheptene was synthesized from 1-heptyne via hydroalumination with DIBAL followed by iodination (Stille, J. K.; Simpson, J. H. *J. Am. Chem. Soc.* **1987**, 109, 2138. Trost, B. M.; Rudd, M. T. *Org. Lett.* **2003**, 5, 4599.). 2-Iodovinylcyclohexane and 1-iodo-3,3-dimethyl-1-butene were synthesized via hydroboration of cyclohexylacetylene or *t*-butylacetylene, respectively, followed by iodination (Brown, H. C.; Hamaoka, T. Ravindran, N.; Subrahmanyam, C.; Somayaji, V.; Bhat, N. G. *J. Org. Chem.* **1989**, 54, 6075. Gagnon, D.; Lauzon, S.; Godbout, C.; Spino, C. *Org. Lett.* **2005**, 7, 4769.). Vinyl iodides bearing pendant TBS-protected alcohols were synthesized via hydrozirconation of the TBS-protected propargyl or homo propargyl alcohol with the Schwartz reagent, followed by iodination (Germain, J.; Deslongchamps, P. *J. Org. Chem.* **2002**, 67, 5269.). Vinyl bromides were purchased from Aldrich Chemical Company and used without further

purification. All other reagents were purchased from either Fisher or Aldrich Chemical Companies and used directly.

**Representative procedure for the synthesis of styryl-activated substrates.**

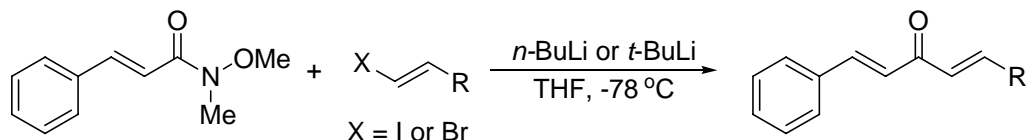

**Method A, from the vinyl iodide:** To 2.25 g (10.0 mmol) of 1-iodoheptene in 10 mL of THF at  $-78\text{ }^{\circ}\text{C}$  was added 4.2 mL (10 mmol) of a 2.4 M solution of *n*-BuLi in hexane dropwise. This solution was stirred for 30 min at  $-78\text{ }^{\circ}\text{C}$  and then transferred dropwise via canula to a solution of 0.965 g (5.00 mmol) of *N*-methoxy-*N*-methylcinnamamide in 50 mL of THF at  $-78\text{ }^{\circ}\text{C}$ . After complete addition, TLC analysis showed complete consumption of the starting material after 15 min at  $-78\text{ }^{\circ}\text{C}$ , so the reaction was subsequently quenched with satd.  $\text{NH}_4\text{Cl}_{(aq)}$ . The crude reaction was transferred to a separatory funnel with 1 M HCl and  $\text{CH}_2\text{Cl}_2$ . The organic layer was collected after shaking, and the aqueous layer was extracted with  $\text{CH}_2\text{Cl}_2$  (1x). The combined organics were dried over  $\text{Na}_2\text{SO}_4$  and concentrated using reduced pressure. Silica gel chromatography (hexanes/EtOAc) of the crude mixture afforded 1.0 g (91%) of (1*E*, 4*E*)-1-phenyldeca-1,4-dien-3-one as a yellow oil. Spectral data was consistent with the literature (Tsuge, O.; Kanemasa, S.; Nakagawa, N.; Suga, H. *Bull. Chem. Soc. Jpn.* **1987**, 69, 4091.).

**Method B, from the vinyl bromide:** To 1.05 g of (*E*)-1-bromopropene in 16 mL of THF at  $-78\text{ }^{\circ}\text{C}$  was added 10.8 mL (17 mmol) of a 1.6 M solution of *t*-BuLi in pentane dropwise. This solution was stirred at this temperature for 30 min and then transferred at ~1 drop/s via canula to a solution of 0.832 g of *N*-methoxy-*N*-methylcinnamamide in 33 mL of THF at  $-78\text{ }^{\circ}\text{C}$  (addition of the vinyl lithium at faster rates gave lower yields). After complete addition, TLC analysis showed complete consumption of the starting material after 15 min at  $-78\text{ }^{\circ}\text{C}$ , so the reaction was subsequently quenched with satd.  $\text{NH}_4\text{Cl}_{(aq)}$ . The crude reaction was transferred to a separatory funnel with 1 M HCl and  $\text{Et}_2\text{O}$ . The organic layer was collected after shaking, and the aqueous layer was extracted with  $\text{Et}_2\text{O}$  (1x). The combined organics were washed with  $\text{H}_2\text{O}$  then brine and finally dried over  $\text{Na}_2\text{SO}_4$  and concentrated using reduced pressure. Silica gel chromatography (hexanes/EtOAc) of the crude mixture afforded 0.571 g (76%) of (1*E*, 4*E*)-1-phenylhexa-1,4-dien-3-one as a yellow oil.

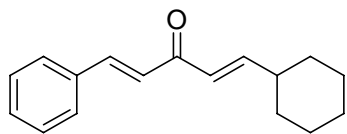

**(1*E*, 4*E*)-1-cyclohexyl-5-phenylpenta-1,4-dien-3-one.** Prepared using Method A in 96% yield. A yellow solid. mp  $42\text{--}46\text{ }^{\circ}\text{C}$ .  $R_f = 0.20$  (12:1 Hexanes:EtOAc); IR (KBr): 2924 (m), 2847 (m), 1806 (w), 1670 (s), 1627 (s), 1592 (s), 1441 (s), 1332 (s), 1278 (m), 1184 (m)  $\text{cm}^{-1}$ ;  $^1\text{H}$  NMR:  $\delta$  7.62 (1H, d,  $J = 16\text{ Hz}$ ), 7.55 (2H, m), 7.30-7.42 (3H, m), 6.97 (1H, d,  $J = 16\text{ Hz}$ ), 6.93 (1H, dd,  $J = 16\text{ Hz}$ ,  $J = 6.8\text{ Hz}$ ), 6.37 (1H, dd,  $J = 14\text{ Hz}$ ,  $J = 1.2\text{ Hz}$ ), 2.19 (1H, m), 1.61-1.88 (5H, m) 1.10-1.40 (5H, m);  $^{13}\text{C}$  NMR:  $\delta$  189.6, 153.2, 142.8, 134.8, 130.3, 128.9, 128.2, 126.8, 124.8, 40.87, 31.80, 25.90, 25.71. LRMS (ESI+) Calc'd for  $\text{C}_{17}\text{H}_{20}\text{O}$  ( $\text{M} + \text{Na}$ ) $^{+}$ : 263.1 Found ( $\text{M} + \text{Na}$ ) $^{+}$ : 263.2.

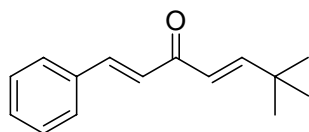

**(1E, 4E)-6,6-dimethyl-1-phenylhepta-1,4-dien-3-one.** Prepared using Method A in 86% yield. An off-white solid. mp 60-64 °C.  $R_f$  = 0.30 (12:1 Hexanes:EtOAc); IR (KBr): 3060 (w), 3017 (w), 2948 (m), 2862 (w), 1950 (w), 1880 (w), 1658 (s), 1588 (s), 1449 (m), 1324 (s), 1208 (s), 1165 (s)  $\text{cm}^{-1}$ ;  $^1\text{H}$  NMR:  $\delta$  7.63 (1H, d,  $J$  = 16 Hz), 7.56 (2H, m), 7.37 (3H, m), 6.98 (2H, d,  $J$  = 16 Hz), 6.32 (1H, d,  $J$  = 16 Hz), 1.12 (9H, s);  $^{13}\text{C}$  NMR:  $\delta$  189.7, 157.9, 142.9, 134.8, 130.3, 128.9, 128.3, 124.9, 124.5, 33.97, 28.72. LRMS (ESI+) Calc'd for  $\text{C}_{15}\text{H}_{18}\text{O}$  ( $\text{M} + \text{Na}$ ) $^+$ : 237.1 Found ( $\text{M} + \text{Na}$ ) $^+$ : 237.1.

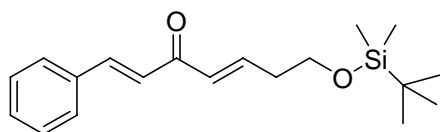

**(1E, 4E)-7-(*t*-butyltrimethylsilyloxy)-1-phenylhepta-1,4-dien-3-one.** Prepared using Method A in 87% yield. A yellow oil.  $R_f$  = 0.19 (12:1 Hexanes:EtOAc); IR (neat): 3029 (w), 2952 (s), 2854 (s), 1950 (w), 1802 (w), 1662 (s), 1631 (s), 1596 (s), 1472 (m), 1336 (m), 1254 (s), 1185 (m)  $\text{cm}^{-1}$ ;  $^1\text{H}$  NMR:  $\delta$  7.63 (1H, d,  $J$  = 16 Hz), 7.55 (2H, m), 7.38 (3H, m), 6.98 (1H, dt,  $J$  = 16 Hz,  $J$  = 8.6 Hz), 6.96 (1H, d,  $J$  = 16 Hz), 3.61 (1H, dt,  $J$  = 16 Hz,  $J$  = 1.2 Hz), 3.76 (2H, t,  $J$  = 6.4 Hz), 3.08 (2H, dq,  $J$  = 7.2 Hz,  $J$  = 1.6 Hz), 0.88 (9H, s), 0.050 (3H, s), 0.042 (3H, s);  $^{13}\text{C}$  NMR:  $\delta$  189.1, 144.7, 143.1, 134.8, 130.8, 130.3, 128.9, 128.2, 124.6, 61.60, 36.15, 25.86, 18.28, -5.33. LRMS (ESI+) Calc'd for  $\text{C}_{19}\text{H}_{28}\text{O}_2\text{Si}$  ( $\text{M} + \text{Na}$ ) $^+$ : 339.2 Found ( $\text{M} + \text{Na}$ ) $^+$ : 339.2.

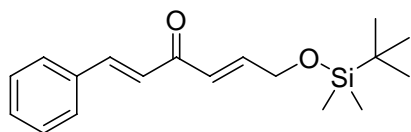

**(1E, 4E)-6-(*t*-butyltrimethylsilyloxy)-1-phenylhexa-1,4-dien-3-one.** Prepared using Method A in 60% yield. A yellow oil.  $R_f$  = 0.20 (12:1 Hexanes:EtOAc); IR (neat): 3060 (w), 2955 (s), 2932 (s), 2854 (s), 1953 (w), 1806 (w), 1666 (s), 1634 (s), 1592 (s), 1449 (s), 1332 (s), 1254 (s), 1138 (s)  $\text{cm}^{-1}$ ;  $^1\text{H}$  NMR:  $\delta$  7.64 (1H, d,  $J$  = 16 Hz), 7.56 (2H, m), 7.38 (3H, m), 7.02 (1H, dt,  $J$  = 15 Hz,  $J$  = 3.6 Hz), 6.95 (1H, d,  $J$  = 16 Hz), 6.73 (1H, dt,  $J$  = 15 Hz,  $J$  = 2.0 Hz), 4.41 (2H, m), 0.94 (9H, s), 0.10 (6H, s);  $^{13}\text{C}$  NMR:  $\delta$  189.1, 146.1, 143.4, 134.7, 130.4, 128.9, 128.3, 126.5, 125.3, 62.52, 25.86, 18.37, -5.41. LRMS (ESI+) Calc'd for  $\text{C}_{18}\text{H}_{26}\text{O}_2\text{Si}$  ( $\text{M} + \text{H}$ ) $^+$ : 303.2 Found ( $\text{M} + \text{H}$ ) $^+$ : 303.2.

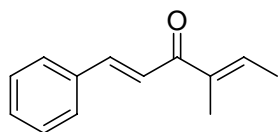

**(1E, 4E)-4-methyl-1-phenylhexa-1,4-dien-3-one.** Prepared using Method B in 53% yield. A yellow oil.  $R_f$  = 0.19 (14:1 Hexanes:EtOAc); IR (neat): 3060 (m), 2920 (m), 1953 (w), 1887 (w), 1654 (s), 1600 (s), 1449 (s), 1328 (s), 1300 (s), 1223 (s)  $\text{cm}^{-1}$ ;  $^1\text{H}$  NMR:  $\delta$  7.59 (1H, d,  $J$  = 16 Hz), 7.55 (2H, m), 7.37 (3H, m), 7.28 (1H, d,  $J$  = 16 Hz), 6.82 (1H, q,  $J$  = 6.0 Hz), 1.89 (3H, d,  $J$  = 6.0 Hz), 1.88 (3H, s);  $^{13}\text{C}$  NMR:  $\delta$  191.7, 142.5, 139.3, 137.4, 135.2, 129.9, 128.8, 128.1, 121.7, 14.80, 11.55. LRMS (ESI+) Calc'd for  $\text{C}_{13}\text{H}_{14}\text{O}$  ( $\text{M} + \text{Na}$ ) $^+$ : 209.1 Found ( $\text{M} + \text{Na}$ ) $^+$ : 209.1.

### Procedure for the catalytic conjugate allylation of dibenzylidene acetone, chalcone, and benzylidene acetone (Scheme 1).

The procedure for dibenzylidene acetone is representative. An oven-dried 20 mL vial equipped with a magnetic stir-bar was charged with 4.9 mg (0.0053 mmol) of tris(dibenzylideneacetone)dipalladium, 3.6 mg (0.013 mmol) of tricyclohexylphosphine, and 1.42 mL of THF in a dry-box under an argon atmosphere. The vial was capped and stirred for 45 min. Next, 39.4 mg (0.234 mmol) of allylboronic acid pinacol ester was added followed by 50.0 mg (0.213 mmol) of dibenzylidene acetone. The vial was capped, taped with electrical

tape, removed from the dry-box, and allowed to stir at ambient temperature for the time indicated in Scheme 1. After this time period, water was added and the mixture transferred to a separatory funnel with CH<sub>2</sub>Cl<sub>2</sub>. After gently swirling the layers (to avoid formation of emulsions), the organic layer was collected and the aqueous layer washed with CH<sub>2</sub>Cl<sub>2</sub> (1x). The combined organic layers were dried with Na<sub>2</sub>SO<sub>4</sub>, and volatiles were removed under reduced pressure. Silica gel chromatography (hexanes/EtOAc) afforded 50.4 mg (80%) of 1,5-diphenyl-1,7-octadien-3-one as a white solid whose spectral data was consistent with the literature (Mandal, S. K.; Amin, Sk. R.; Crowe, W. E. *J. Am. Chem. Soc.* **2001**, *123*, 6457.).

#### **Procedure for the catalyst survey in the conjugate allylation (Table 1).**

**Procedure using Pd<sub>2</sub>(dba)<sub>3</sub>:** An oven-dried 2-dram vial equipped with a magnetic stir-bar was charged with 2.3 mg (0.0025 mmol) of tris(dibenzylideneacetone)dipalladium, 0.0060 mmol of phosphine ligand, and 0.20 mL of THF in a dry-box under an argon atmosphere (ligands that could not be weighed in directly were added as 0.20 mL (0.0060 mmol) of a 0.030 M stock solution in THF and no additional solvent was added). The vial was capped and stirred for 45 min. Next, 19 mg (0.11 mmol) of allylboronic acid pinacol ester was added followed by 0.31 mL (0.10 mmol) of a 0.325 M stock solution of (1*E*, 4*E*)-1-phenyldeca-1,4-dien-3-one in THF. The vial was capped, taped with electrical tape, removed from the dry-box, and allowed to stir at ambient temperature for the time indicated in Table 1. After this time period, water was added and the mixture transferred to a separatory funnel with CH<sub>2</sub>Cl<sub>2</sub>. After gently swirling the layers, the organic layer was collected and the aqueous layer washed with CH<sub>2</sub>Cl<sub>2</sub> (1x). The combined organic layers were dried with Na<sub>2</sub>SO<sub>4</sub>, and volatiles were removed under reduced pressure. NMR analysis of the crude mixture was used to determine the regioselectivity of the reaction. Yields were determined after isolation of pure material, as a mixture of isomers, using silica gel chromatography (hexanes/EtOAc).

**Procedure using Ni(cod)<sub>2</sub>:** An oven-dried 20 mL scintillation vial equipped with a magnetic stir-bar was charged with 6.0 mg (0.022 mmol) of bis(1,5-cyclooctadiene)nickel, 0.0438 mmol of phosphine ligand, and 1.46 mL of THF in a dry-box under an argon atmosphere. The vial was capped and stirred for 45 min. Next, 44.2 mg (0.263 mmol) of allylboronic acid pinacol ester was added followed by 50.0 mg (0.219 mmol) of (1*E*, 4*E*)-1-phenyldeca-1,4-dien-3-one. The vial was capped, taped with electrical tape, removed from the dry-box, and allowed to stir at ambient temperature for 4 h. After this time period, ~15 mL of water was added and the mixture transferred to a separatory funnel with CH<sub>2</sub>Cl<sub>2</sub>. After gently swirling the layers, the organic layer was collected and the aqueous layer washed with CH<sub>2</sub>Cl<sub>2</sub> (1x). The combined organic layers were dried with Na<sub>2</sub>SO<sub>4</sub>, and volatiles were removed under reduced pressure. NMR analysis of the crude mixture was used to determine the regioselectivity of the reaction. Yields were determined after isolation of pure material, as a mixture of isomers, using silica gel chromatography (hexanes/EtOAc).

#### **Procedure for the Ni-catalyzed conjugate allylation of styryl enones (Table 2).**

The conjugate allylation of styryl-activated enones using Ni(cod)<sub>2</sub> was performed using the same procedure described above for the reaction in Table 1 using Ni(cod)<sub>2</sub>, where tricyclohexylphosphine was the ligand used. Reactions were performed using 50.0 mg of substrate and run at the temperature and for the time indicated in Table 2. For the allylation reaction using (*E*)-5-methyl-1-phenylhexa-1,4-dien-3-one (entry 8) as the substrate, 2.0 equiv of allylboronic acid pinacol ester was used. For substrates bearing TBS-protected alcohols (entry 5, 6), buffer (pH=7) was used instead of H<sub>2</sub>O in the extraction step. The reaction utilizing (1*E*, 4*E*)-4-methyl-1-phenylhexa-1,4-dien-3-one as the substrate (entry 9) was quenched with 2.2 equiv of 1.0 M HCl in Et<sub>2</sub>O under N<sub>2</sub> before adding H<sub>2</sub>O.

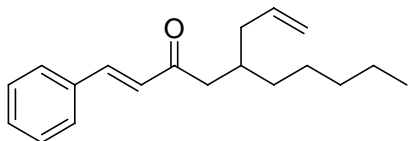

***E*)-5-allyl-1-phenyldec-1-en-3-one.** An oil. Regioisomers were separable using iterative column chromatography (SiO<sub>2</sub>/hexanes:EtOAc).  $R_f$ (major) = 0.22 (18:1 Hexanes:EtOAc);  $R_f$ (minor) = 0.19 (18:1 Hexanes:EtOAc); IR (major, neat): 3064 (w), 2948 (s), 2917 (s), 2858 (s), 1942 (w), 1821 (w), 1689 (s), 1654 (s), 1608 (s), 1445 (s), 1320 (m), 1167 (m) cm<sup>-1</sup>; <sup>1</sup>H NMR:  $\delta$  (major) 7.48-7.59 (3H, m), 7.37 (3H, m), 6.72 (1H, d,  $J$  = 16 Hz), 5.76 (1H, m), 5.01 (2H, d,  $J$  = 12 Hz), 2.61 (1H, dd,  $J$  = 16 Hz,  $J$  = 6.0 Hz), 2.52 (1H, dd,  $J$  = 16 Hz,  $J$  = 6.0 Hz), 1.95-2.20 (3H, m), 1.15-1.40 (8H, m), 0.86 (3H, t,  $J$  = 7.2 Hz);  $\delta$  (minor) 7.20-7.30 (2H, m), 7.10-7.20 (3H, m), 6.72 (1H, dt,  $J$  = 16 Hz,  $J$  = 7.2 Hz), 5.99 (1H, d,  $J$  = 16 Hz), 5.63 (1H, m), 4.94 (2H, m), 3.29 (1H, p,  $J$  = 7.2 Hz), 2.82 (2H, m), 2.37 (2H, t,  $J$  = 7.2 Hz), 2.13 (2H, q,  $J$  = 6.8 Hz), 1.38 (2H, p,  $J$  = 7.2 Hz), 1.17-1.32 (6H, m), 0.87 (3H, t,  $J$  = 6.8 Hz); <sup>13</sup>C NMR:  $\delta$  (major) 200.4, 142.2, 136.6, 134.6, 130.3, 128.9, 128.2, 126.6, 116.6, 45.23, 38.26, 34.07, 33.80, 31.97, 26.40, 22.58, 14.03. LRMS (ESI+) Calc'd for C<sub>19</sub>H<sub>26</sub>O (M + Na)<sup>+</sup>: 293.2 Found (M + Na)<sup>+</sup>: 293.2.

<sup>1</sup>H NMR analysis of Crude Reaction Mixture (400 MHz, CDCl<sub>3</sub>):

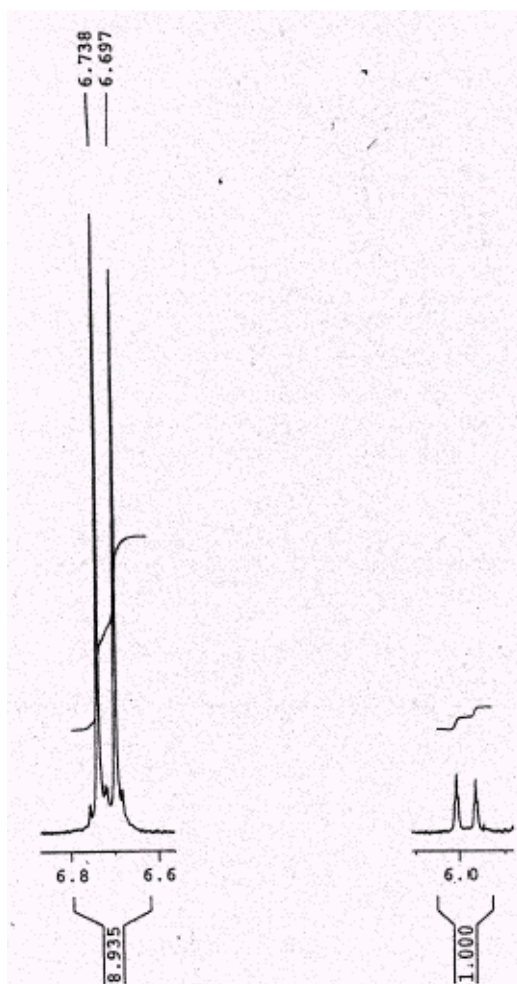

Vinyl CH  
(minor + major  
isomers)

Vinyl CH  
(minor isomer)

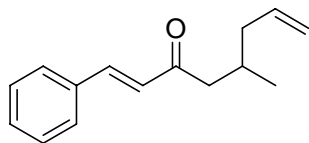

**(E)-5-methyl-1-phenylocta-1,7-dien-3-one.** An oil.  $R_f = 0.24$  (12:1 Hexanes:EtOAc); IR (neat): 3064 (m), 2955 (s), 2917 (s), 1946 (w), 1829 (w), 1689 (s), 1666 (s), 1611 (s), 1452 (s), 1324 (s), 1173 (s)  $\text{cm}^{-1}$ ;  $^1\text{H}$  NMR:  $\delta$  7.45-7.57 (3H, m), 7.28-7.44 (3H, m), 6.72 (1H, d,  $J = 16$  Hz), 5.77 (1H, m), 5.02 (2H, d,  $J = 14$  Hz), 2.66 (1H, dd,  $J = 16$  Hz,  $J = 6.0$  Hz), 2.43 (1H, dd,  $J = 16$  Hz,  $J = 8.0$  Hz), 2.19 (1H, m), 1.95-2.12 (2H, m), 0.95 (3H, d,  $J = 6.4$  Hz);  $^{13}\text{C}$  NMR:  $\delta$  200.2, 142.4, 136.7, 134.5, 130.4, 128.9, 128.2, 126.5, 116.5, 47.43, 41.20, 29.52, 19.77. LRMS (ESI+) Calc'd for  $\text{C}_{15}\text{H}_{18}\text{O}$  ( $\text{M} + \text{Na}$ ) $^+$ : 237.1 Found ( $\text{M} + \text{Na}$ ) $^+$ : 237.1.

$^1\text{H}$  NMR analysis of Crude Reaction Mixture (400 MHz,  $\text{CDCl}_3$ ):

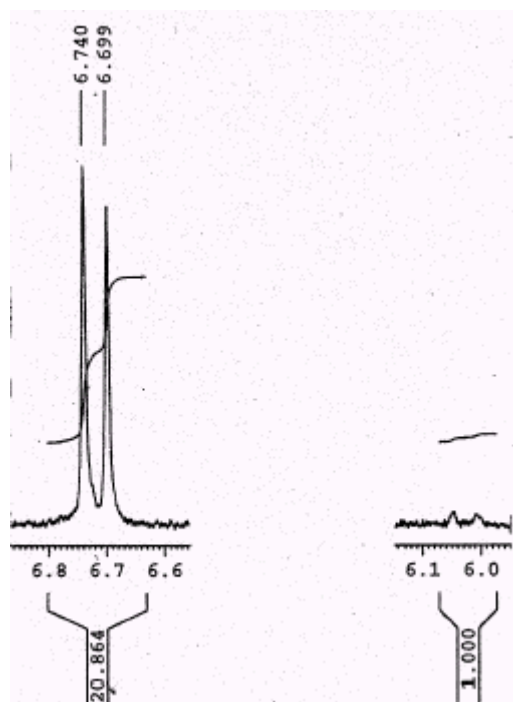

Vinyl CH  
(minor + major  
isomers)

Vinyl CH  
(minor isomer)

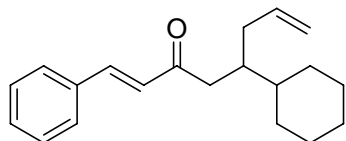

**(E)-5-cyclohexyl-1-phenylocta-1,7-dien-3-one.** An oil. Regioisomers were inseparable using column chromatography (SiO<sub>2</sub>/hexanes:EtOAc).  $R_f$  = 0.29 (12:1 Hexanes:EtOAc); IR (neat): 3056 (m), 2913 (s), 2842 (s), 1953 (w), 1817 (w), 1685 (s), 1662 (s), 1603 (s), 1441 (s), 1320 (m), 1181 (m) cm<sup>-1</sup>; <sup>1</sup>H NMR:  $\delta$  7.52 (3H, m, major), 7.37 (3H, m, major), 7.25 (2H, m, minor), 7.16 (3H, m, minor), 6.72 (1H, d,  $J$  = 16 Hz, major), 6.65 (1H, dd,  $J$  = 16 Hz,  $J$  = 6.8 Hz, minor), 5.93 (1H, d,  $J$  = 16 Hz, minor), 5.74 (1H, m, major), 5.63 (1H, m, minor), 4.90-5.05 (4H, m, major & minor), 3.28 (1H, p,  $J$  = 7.2 Hz, minor), 2.81 (2H, m, minor), 2.61 (1H, dd,  $J$  = 16 Hz,  $J$  = 6.0 Hz, major) 2.52 (1H, dd,  $J$  = 16 Hz,  $J$  = 6.8 Hz, major), 2.37 (2H, t,  $J$  = 7.2 Hz, minor), 2.16 (1H, m, major), 1.91-2.10 (3H, m, major & minor), 1.57-1.78 (10H, m, major & minor), 1.36 (1H, m, major), 0.94-1.29 (10H, m, major & minor); <sup>13</sup>C NMR:  $\delta$  200.4, 199.5, 152.3, 144.2, 142.0, 137.4, 136.2, 134.6, 130.2, 128.8, 128.3, 128.2, 128.0, 127.5, 126.5, 126.2, 116.6, 116.2, 46.10, 42.55, 41.05, 40.59, 40.54, 40.40, 39.20, 35.90, 31.73, 30.06, 29.68, 26.71, 25.90, 25.68. LRMS (ESI+) Calc'd for C<sub>20</sub>H<sub>26</sub>O (M + Na)<sup>+</sup>: 305.2 Found (M + Na)<sup>+</sup>: 305.2.

<sup>1</sup>H NMR analysis of Crude Reaction Mixture (400 MHz, CDCl<sub>3</sub>):

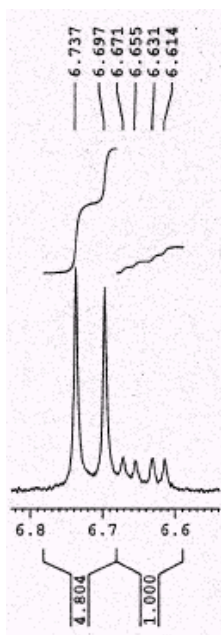

Vinyl CH  
(minor + major  
isomers)

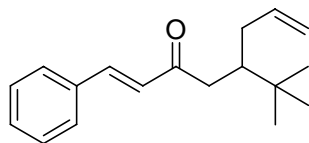

**(E)-5-t-butyl-1-phenylocta-1,7-dien-3-one.** An oil.  $R_f = 0.24$  (15:1 Hexanes:EtOAc); IR (neat): 3064 (m), 2959 (s), 2870 (m), 1953 (w), 1814 (w), 1689 (s), 1654 (s), 1608 (s), 1445 (s), 1363 (s), 1185 (m)  $\text{cm}^{-1}$ ;  $^1\text{H}$  NMR:  $\delta$  7.48-7.57 (3H, m), 7.37 (3H, m), 6.73 (1H, d,  $J = 16$  Hz), 5.72 (1H, m), 4.97 (1H, d,  $J = 17$  Hz), 4.91 (1H, d,  $J = 10$  Hz) 2.66 (1H, dd,  $J = 17$  Hz,  $J = 4.0$  Hz), 2.46 (1H, dd,  $J = 17$  Hz,  $J = 6.0$  Hz), 2.32-2.41 (1H, m), 2.13 (1H, m), 1.78 (1H, m), 0.89 (9H, s);  $^{13}\text{C}$  NMR:  $\delta$  200.1, 141.6, 138.4, 134.5, 130.1, 128.7, 128.0, 126.3, 115.8, 42.47, 41.99, 35.65, 33.28, 27.50. LRMS (ESI+) Calc'd for  $\text{C}_{18}\text{H}_{24}\text{O}$  ( $\text{M} + \text{Na}$ ) $^+$ : 279.2 Found ( $\text{M} + \text{Na}$ ) $^+$ : 279.2.

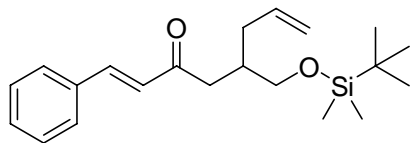

**(E)-5-(t-butyldimethylsilyloxy)methyl-1-phenylocta-1,7-dien-3-one.** An oil. Regioisomers were separable using column chromatography ( $\text{SiO}_2$ /hexanes:EtOAc).  $R_f = 0.26$  (14:1 Hexanes:EtOAc); IR (neat): 3076 (m), 2955 (s), 2924 (s), 2854 (s), 1689 (s), 1662 (s), 1611 (s), 1471 (m), 1363 (m), 1251 (s), 1103 (s)  $\text{cm}^{-1}$ ;  $^1\text{H}$  NMR:  $\delta$  7.49-7.59 (3H, m), 7.37 (3H, m), 6.72 (1H, d,  $J = 16$  Hz), 5.77 (1H, m), 5.03 (2H, m), 3.56 (1H, dd,  $J = 10$  Hz,  $J = 4.8$  Hz), 3.51 (1H, dd,  $J = 10$  Hz,  $J = 5.6$  Hz), 2.77 (1H, dd,  $J = 16$  Hz,  $J = 6.8$  Hz), 2.53 (1H, dd,  $J = 16$  Hz,  $J = 6.0$  Hz), 2.11-2.31 (2H, m), 2.07 (1H, m), 0.87 (9H, s), 0.015 (3H, s), 0.0030 (3H, s);  $^{13}\text{C}$  NMR:  $\delta$  200.2, 142.3, 136.5, 134.6, 130.3, 128.9, 128.2, 126.7, 116.6, 64.73, 41.91, 36.94, 35.63, 25.89, 18.26, -5.46. LRMS (ESI+) Calc'd for  $\text{C}_{21}\text{H}_{32}\text{O}_2\text{Si}$  ( $\text{M} + \text{Na}$ ) $^+$ : 367.2 Found ( $\text{M} + \text{Na}$ ) $^+$ : 367.3.

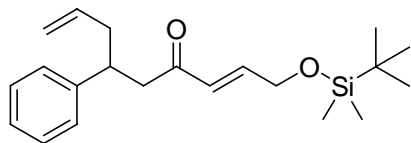

**(E)-1-(t-butyldimethylsilyloxy)-6-phenylnona-2,8-dien-4-one.** An oil. Regioisomers were separable using column chromatography ( $\text{SiO}_2$ /hexanes:EtOAc).  $R_f = 0.18$  (14:1 Hexanes:EtOAc); IR (neat): 3056 (m), 3029 (m), 2948 (s), 2924 (s), 2858 (s), 1697 (s), 1670 (s), 1635 (s), 1468 (m), 1359 (m), 1251 (s), 1134 (s)  $\text{cm}^{-1}$ ;  $^1\text{H}$  NMR:  $\delta$  7.20-7.30 (2H, m), 7.10-7.20 (3H, m), 6.76 (1H, dt,  $J = 16$  Hz,  $J = 3.2$  Hz), 6.28 (1H, d,  $J = 16$  Hz), 5.63 (1H, m), 4.96 (1H, d,  $J = 16$  Hz), 4.93 (1H, d,  $J = 10$  Hz), 4.28 (2H, m), 3.31 (1H, p,  $J = 7.2$  Hz), 2.85 (2H, m), 2.37 (2H, t,  $J = 7.2$  Hz), 0.90 (9H, s), 0.045 (6H, s);  $^{13}\text{C}$  NMR:  $\delta$  198.9, 145.3, 144.2, 136.2, 128.4, 127.9, 127.5, 126.3, 116.7, 62.23, 46.70, 40.81, 40.60, 25.84, 18.35, -5.45. LRMS (ESI+) Calc'd for  $\text{C}_{21}\text{H}_{32}\text{O}_2\text{Si}$  ( $\text{M} + \text{Na}$ ) $^+$ : 367.2 Found ( $\text{M} + \text{Na}$ ) $^+$ : 367.3.

$^1\text{H}$  NMR analysis of Crude Reaction Mixture (400 MHz,  $\text{CDCl}_3$ ):

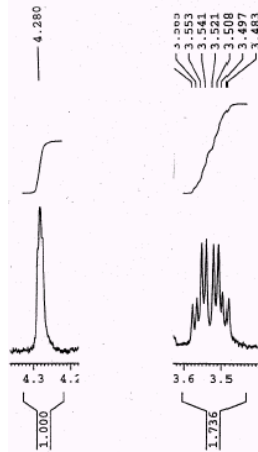

Carbinol (minor isomer) Carbinol (major isomer)



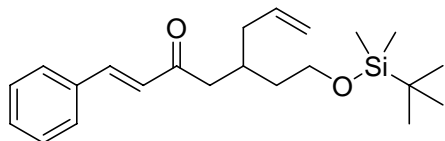

**(E)-5-(2-*t*-butyldimethylsilyloxy)ethyl-1-phenylocta-1,7-dien-3-one.**

An oil. Regioisomers were separable using iterative column chromatography (SiO<sub>2</sub>/hexanes:EtOAc). *R<sub>f</sub>* (major) = 0.25 (15:1 Hexanes:EtOAc); *R<sub>f</sub>* (minor) = 0.18 (15:1 Hexanes:EtOAc); IR (major, neat): 3068 (m), 2948 (s), 2932 (s), 2847 (s), 1953 (w), 1817 (w), 1682 (s),

1658 (s), 1611 (s), 1468 (m), 1328 (m), 1254 (s) cm<sup>-1</sup>; <sup>1</sup>H NMR: δ (major) 7.45-7.57 (3H, m), 7.37 (3H, m), 6.72 (1H, d, *J* = 16 Hz), 5.76 (1H, m), 5.02 (2H, m), 3.66 (2H, m), 2.63 (2H, d, *J* = 6.4 Hz), 2.27 (1H, heptet, *J* = 6.4 Hz), 2.01-2.20 (2H, m), 1.45-1.67 (2H, m), 0.86 (9H, s), 0.020 (6H, s); δ (minor) 7.21-7.30 (2H, m), 7.10-7.20 (3H, m), 6.74 (1H, dt, *J* = 16 Hz, *J* = 7.2 Hz), 6.04 (1H, d, *J* = 16 Hz), 5.62 (1H, m), 4.96 (1H, d, *J* = 15 Hz), 4.93 (1H, d, *J* = 10 Hz), 3.67 (2H, t, *J* = 6.4 Hz), 3.30 (1H, p, *J* = 7.2 Hz), 2.83 (2H, m), 2.35 (4H, m), 0.87 (9H, s), 0.023 (6H, s); <sup>13</sup>C NMR: δ (major) 200.1, 142.3, 136.4, 134.6, 130.3, 128.9, 128.2, 126.5, 116.9, 61.20, 45.29, 38.42, 36.61, 31.23, 25.92, 18.26, -5.34. LRMS (ESI+) Calc'd for C<sub>22</sub>H<sub>34</sub>O<sub>2</sub>Si (M + Na)<sup>+</sup>: 381.2 Found (M + Na)<sup>+</sup>: 381.3.

<sup>1</sup>H NMR analysis of Crude Reaction Mixture (400 MHz, CDCl<sub>3</sub>):

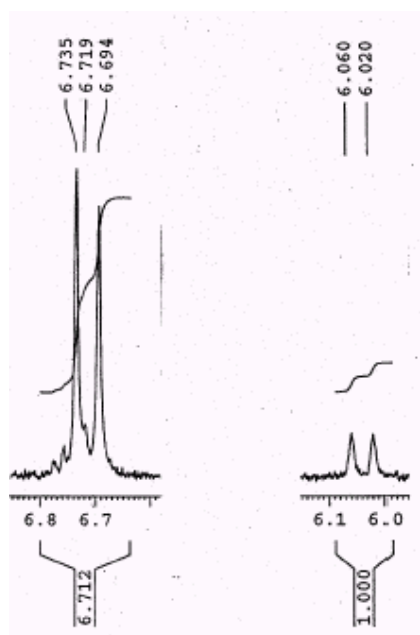

Vinyl CH  
(minor + major  
isomers)

Vinyl CH  
(minor isomer)

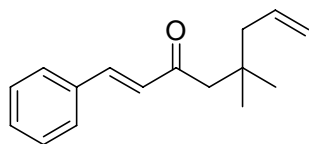

**(E)-5,5-dimethyl-1-phenylocta-1,7-dien-3-one.** An oil.  $R_f = 0.26$  (14:1 Hexanes:EtOAc); IR (neat): 3072 (m), 2959 (s), 2862 (s), 1950 (w), 1814 (w), 1685 (s), 1651 (s), 1608 (s), 1440 (s), 1332 (s), 1200 (s)  $\text{cm}^{-1}$ ;  $^1\text{H}$  NMR:  $\delta$  7.52 (2H, m), 7.49 (1H, d,  $J = 16$  Hz), 7.36 (3H, m), 6.72 (1H, d,  $J = 16$  Hz), 5.84 (1H, m), 5.05 (2H, m), 2.52 (2H, s), 2.12 (2H, d,  $J = 7.6$  Hz), 1.03 (6H, s);  $^{13}\text{C}$  NMR:  $\delta$  200.0, 141.9, 135.0, 134.6, 130.3, 128.9, 128.3, 127.6, 117.7, 51.49, 46.86, 34.30, 27.40. LRMS (ESI+) Calc'd for  $\text{C}_{16}\text{H}_{20}\text{O}$  ( $\text{M} + \text{Na}$ ) $^+$ : 251.1 Found ( $\text{M} + \text{Na}$ ) $^+$ : 251.2.

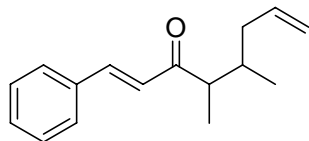

**(E)-4,5-dimethyl-1-phenylocta-1,7-dien-3-one.** An oil. Isolated as an inseparable mixture of diastereomers using column chromatography ( $\text{SiO}_2$ /hexanes:EtOAc).  $R_f = 0.26$  (14:1 Hexanes:EtOAc); IR (neat): 3076 (m), 2967 (s), 2920 (s), 1942 (w), 1821 (w), 1685 (s), 1651 (s), 1608 (s), 1449 (s), 1324 (s), 1188 (m)  $\text{cm}^{-1}$ ;  $^1\text{H}$  NMR:  $\delta$  7.58 (2H, d,  $J = 16$  Hz, major & minor), 7.54 (4H, m, major & minor), 7.37 (6H, major & minor), 6.80 (1H, d,  $J = 16$  Hz, major), 6.79 (1H, d,  $J = 16$  Hz, minor), 5.76 (2H, m, major & minor), 5.02 (4H, m, major & minor), 2.80 (1H, p,  $J = 6.4$  Hz, minor), 2.73 (1H, p,  $J = 6.8$  Hz, major), 1.85-2.28 (6H, m, major & minor), 1.13 (3H, d,  $J = 6.8$  Hz, major), 1.06 (3H, d,  $J = 7.2$  Hz, minor), 0.92 (3H, d,  $J = 6.4$  Hz, major), 0.84 (3H, d,  $J = 6.4$  Hz, minor);  $^{13}\text{C}$  NMR:  $\delta$  203.6, 203.5, 142.3, 136.9, 136.65, 136.59, 134.6, 130.4, 130.3, 128.9, 128.3, 128.27, 125.3, 125.1, 116.5, 116.4, 49.60, 48.47, 39.67, 37.42, 35.31, 34.59, 17.72, 15.25, 13.65, 11.35. LRMS (ESI+) Calc'd for  $\text{C}_{16}\text{H}_{20}\text{O}$  ( $\text{M} + \text{Na}$ ) $^+$ : 251.1 Found ( $\text{M} + \text{Na}$ ) $^+$ : 251.1.

### Procedure for the ring closing metathesis in Scheme 2.

To 47.9 mg (0.173 mmol) of 1,5-diphenyl-1,7-octadien-3-one was added 2.2 mg (0.0035 mmol) of Hoveyda-Grubb's 2<sup>nd</sup> generation catalyst (Garber, S. B.; Kingbury, J. S.; Gray, B. L.; Hoveyda, A. H. *J. Am. Chem. Soc.* **2000**, *122*, 8168) in a dry-box under Ar. This was diluted with 5.7 mL of dry, degassed  $\text{CH}_2\text{Cl}_2$ . A magnetic stir bar was added, followed by a septum, and the reaction was removed from the dry-box and stirred at room temperature under  $\text{N}_2$ . After 1h, 3 drops (22 G needle) of *t*-butyl vinyl ether was added and volatiles removed under reduced pressure. Silica gel chromatography (pentane/ $\text{Et}_2\text{O}$ ) of the crude mixture afforded 28.1 mg (94%) of 5-phenylcyclohex-2-enone whose spectral data was consistent with the literature (Rutherford, A. P.; Gibb, C. S.; Hartley, R. C.; Goodman, J. M. *J. Chem. Soc. Perkin Trans. 1* **2001**, 1051.).

### Procedure for the Sn-catalyzed Baeyer-Villager oxidation in Scheme 2.

For lead reference, see: Göttlich, R.; Yamakoshi, K.; Sasai, H.; Shibasaki, M. *Synlett* **1997**, 971. In a 2-dram vial with magnetic stir bar in a dry-box under Ar was weighed ~30 mg of crushed 4 Å molecular sieves. Next, 33.8  $\mu\text{L}$  (0.0338 mmol) of a 1 M solution of ( $\pm$ )-*trans*-1,2-diaminocyclohexane in  $\text{CH}_2\text{Cl}_2$  was added by syringe followed by dilution with 0.32 mL of  $\text{CH}_2\text{Cl}_2$ . Next, 33.8  $\mu\text{L}$  (0.0338 mmol) of a 1 M solution of  $\text{SnCl}_4$  in  $\text{CH}_2\text{Cl}_2$  was added and the vial was capped with a septum, removed from the dry-box and cooled to 0 °C (ice/brine).  $\text{TMS}_2\text{O}_2$  was added dropwise as a 1 M solution in  $\text{CH}_2\text{Cl}_2$  (0.27 mL, 0.27 mmol). After stirring for 10 min at this temperature, 37.3 mg (0.135 mmol) of 1,5-diphenyl-1,7-octadien-3-one was added in 0.59 mL  $\text{CH}_2\text{Cl}_2$  via canula. The reaction became a blue-gray color and was subsequently warmed to room temperature and stirred for 15 h. Sodium sulfite (41 mg) was then added, and the reaction stirred for an additional 3 h. Finally, the reaction was filtered through a pad of silica gel using EtOAc and concentrated under reduced pressure. Silica gel chromatography (hexanes/EtOAc) of the crude material afforded 31.5 mg (80 %) of (*E*)-styryl-3-phenylhex-5-enoate as a white solid.

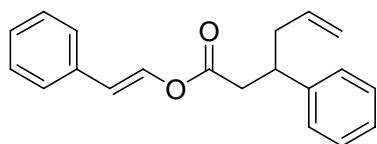

**(E)-styryl-3-phenylhex-5-enoate.** A white solid. mp = 66-70°C.  $R_f$  = 0.24 (30:1 Hexanes:EtOAc); IR (CH<sub>2</sub>Cl<sub>2</sub> solution): 3087 (m), 3024 (m), 2917 (m), 1747 (s), 1652 (m), 1495 (m), 1212 (m), 1142 (s) cm<sup>-1</sup>; <sup>1</sup>H NMR:  $\delta$  7.74 (1H, d,  $J$  = 13 Hz), 7.24-7.39 (6H, m), 7.10-7.24 (4H, m), 6.03 (1H, d,  $J$  = 13 Hz), 5.66 (1H, m), 5.02 (2H, m), 3.26 (1H, p,  $J$  = 7.2 Hz), 2.81 (1H, dd,  $J$  = 16 Hz,  $J$  = 6.4 Hz), 2.68 (1H, dd,  $J$  = 16 Hz,  $J$  = 8.4 Hz), 2.42 (2H, m); <sup>13</sup>C NMR:  $\delta$  169.3, 143.1, 136.1, 135.6, 134.0, 128.6, 128.5, 127.3, 126.7, 126.1, 117.1, 115.2, 41.56, 40.61, 40.26. Note that the peak at 127.3 ppm was 2 overlapping signals that could not be resolved at higher frequency. <sup>13</sup>C analysis in C<sub>6</sub>D<sub>6</sub> (125 MHz) resolved these peaks. This data (C<sub>6</sub>D<sub>6</sub> referenced at 128.39 relative to tetramethylsilane) was: 169.3, 143.9, 137.0, 136.4, 134.9, 129.2, 129.1, 128.1, 127.8, 127.3, 126.8, 117.4, 115.7, 42.22, 41.12, 40.63. LRMS (ESI+) Calc'd for C<sub>20</sub>H<sub>20</sub>O<sub>2</sub> (M + Na)<sup>+</sup>: 315 Found (M + Na)<sup>+</sup>: 315.

### Procedure for the hydrolysis of (E)-styryl-3-phenylhex-5-enoate (Scheme 2).

To a solution of 26.3 mg (0.900 mmol) of (E)-styryl-3-phenylhex-5-enoate in 0.68 mL of THF was added 0.22 mL of water, and the reaction then subsequently cooled to 0 °C. LiOH•H<sub>2</sub>O (7.6 mg, 0.18 mmol) was then added, and the reaction was stirred at this temperature and monitored by TLC. After complete consumption of the starting material (2-2.5 h), the reaction was acidified with 1 M HCl and extracted with EtOAc (3x). The organic layers were combined, washed with brine, and dried over anhydrous Na<sub>2</sub>SO<sub>4</sub>. Volatiles were removed under reduced pressure, and the product was purified using silica gel chromatography (1% AcOH in CH<sub>2</sub>Cl<sub>2</sub>/Et<sub>2</sub>O,  $R_f$  = 0.25 in 1% AcOH in 20:1 CH<sub>2</sub>Cl<sub>2</sub>:Et<sub>2</sub>O) to give 16.5 mg (96%) of 3-phenylhex-5-enoic acid after removal of AcOH by azeotropic distillation with toluene using a rotary evaporator followed by removal of toluene via azeotropic distillation with CH<sub>2</sub>Cl<sub>2</sub>. Spectral data was consistent with the literature (Allin, S. M.; Essat, M.; Pita, C. H.; Baird, R. D.; McKee, V.; Elsegood, M.; Edgar, M.; Andrews, D. M.; Shah, P.; Aspinall, I. *Org. Biomol. Chem.* **2005**, 3, 809.).

### Procedure for the asymmetric conjugate allylation of dibenzylidene acetone (Scheme 4).

An oven-dried 2-dram vial equipped with a magnetic stir-bar was charged with 2.5 mg (0.0027 mmol) of tris(dibenzylideneacetone)dipalladium, 6.3 mg (0.0064 mmol) of chiral ligand (for ligand synthesis see: Woodward, A. R.; Burks, H. E.; Chan, L. M.; Morken, J. P. *Org. Lett.* **2005**, 7, 5505), and 0.71 mL of THF in a dry-box under an argon atmosphere. The vial was capped and stirred for 45 min. Next, 19.8 mg (0.118 mmol) of allylboronic acid pinacol ester was added followed by 25.0 mg (0.107 mmol) of dibenzylidene acetone. The vial was capped, taped with electrical tape, removed from the dry-box, and allowed to stir at ambient temperature for 24 h. After this time period, water was added and the mixture transferred to a separatory funnel with CH<sub>2</sub>Cl<sub>2</sub>. After gently swirling the layers, the organic layer was collected and the aqueous layer washed with CH<sub>2</sub>Cl<sub>2</sub> (2x). The combined organic layers were dried with Na<sub>2</sub>SO<sub>4</sub>, and volatiles were removed under reduced pressure. Silica gel chromatography (hexanes/EtOAc) afforded 26.3 mg (83%) of 1,5-diphenyl-1,7-octadien-3-one whose spectral data has been reported previously (Mandal, S. K.; Amin, S. R.; Crowe, W. E. *J. Am. Chem. Soc.* **2001**, 123, 6457.). The optical rotation was:  $[\alpha]_D^{20}$  = +13° ( $c$  = 1.0, CHCl<sub>3</sub>). The absolute configuration was determined by performing the ring-closing metathesis shown in Scheme 2 on the chiral material and comparing the optical rotation ( $[\alpha]_D^{20}$  = -42° ( $c$  = 0.5, CHCl<sub>3</sub>)) with the known value (Hareau, G. P.-J.; Koiwa, M.; Hikichi, S.; Sato, F. *J. Am. Chem. Soc.* **1999**, 121, 3640). The enantiomeric excess was determined using chiral SFC (data shown below).

Chiral SFC (AD-H, Chiralpak, 150 psi, 50°C, flow = 3 mL/min, 4% MeOH) analysis of conjugate allylation product:

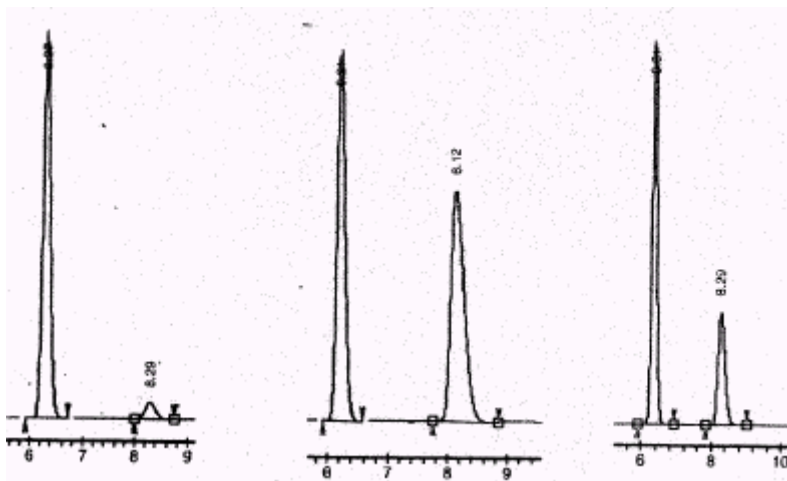

Allylation  
product

Racemic

Allylation product +  
racemic coinjection

| #     | Name    | Start [Min] | Time [Min] | End [Min] | RT Offset [Min] | Quantity [% Area] | Height [μV] | Area [μV.Min] | Area [%] |
|-------|---------|-------------|------------|-----------|-----------------|-------------------|-------------|---------------|----------|
| 1     | UNKNOWN | 5.91        | 6.27       | 6.72      | 0               | 94.41             | 24264.9     | 3924          | 94.412   |
| 2     | UNKNOWN | 8           | 8.29       | 8.75      | 0               | 5.59              | 1032.6      | 232.3         | 5.588    |
|       |         |             |            |           |                 |                   |             |               |          |
| Total |         |             |            |           |                 | 100               | 25297.5     | 4156.2        | 100      |

**Computational Methods:** DFT calculations were performed using B3LYP<sup>1,2</sup> with the basis set of Stuttgart RSC 1997 ECP<sup>3</sup> for Pd, 6-311+G\*<sup>4</sup> for others. All calculations were conducted using Gaussian 03 C02 package<sup>5</sup> with tight SCF convergence and ultra fine integration grids on the 128-CPU SGI Altix 3700 SMP machine<sup>6</sup> at University of North Carolina at Chapel Hill. In search for the transition state structure, a single-point frequency calculation has been performed to ensure that the final structure obtained (i) has only one imaginary frequency and (ii) the vibration mode of the negative frequency corresponds to the anticipated bond formation.

Reactant (3,3'-Elimination):

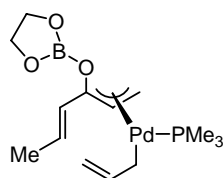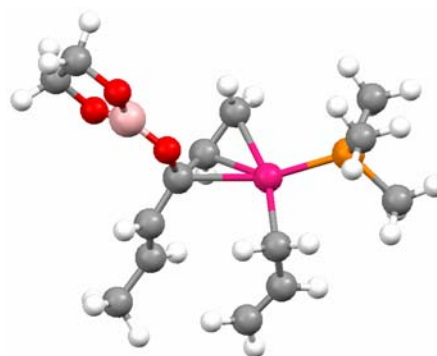

|    |          |          |          |
|----|----------|----------|----------|
| C  | -2.21400 | 4.32800  | 0.38200  |
| H  | -1.45700 | 5.10300  | 0.21800  |
| H  | -2.84100 | 4.67800  | 1.21100  |
| H  | -2.84300 | 4.27600  | -0.51100 |
| B  | -3.03100 | -1.03000 | -0.44800 |
| C  | -1.33600 | 0.53100  | 0.28900  |
| C  | 3.16900  | -2.19400 | -1.51400 |
| C  | 3.32900  | -2.44700 | 1.34000  |
| C  | 4.53300  | -0.19900 | 0.04200  |
| C  | -0.74800 | 0.10100  | 1.49100  |
| C  | -5.12300 | -1.49800 | 0.29100  |
| C  | -4.73400 | -2.47100 | -0.84800 |
| C  | -1.84100 | 1.87100  | 0.02100  |
| C  | -0.18400 | -1.17200 | 1.69100  |
| C  | -1.58900 | 3.00300  | 0.69800  |
| C  | 1.25700  | 3.71300  | -0.75200 |
| C  | 1.57700  | 1.30800  | -1.42700 |
| C  | 1.96800  | 2.57100  | -0.79200 |
| H  | 3.09000  | -1.54300 | -2.38600 |
| H  | 4.13000  | -2.71600 | -1.54300 |
| H  | 2.36300  | -2.92800 | -1.57300 |
| H  | 2.52200  | -3.18100 | 1.36900  |
| H  | 4.27700  | -2.96500 | 1.16700  |
| H  | 3.36800  | -1.95300 | 2.31200  |
| H  | 4.60100  | 0.36200  | 0.97700  |
| H  | 5.41800  | -0.83600 | -0.05300 |
| H  | 4.52400  | 0.51800  | -0.78000 |
| H  | -5.44200 | -2.01000 | 1.20200  |
| H  | -5.90700 | -0.79700 | -0.00900 |
| H  | -4.59100 | -3.49500 | -0.48800 |
| H  | -5.45900 | -2.48500 | -1.66300 |
| H  | -2.49300 | 1.92600  | -0.85000 |
| H  | -0.91100 | 2.98700  | 1.54800  |
| H  | 2.38900  | 0.86900  | -2.01100 |
| H  | 0.69700  | 1.41000  | -2.06700 |
| H  | 2.93300  | 2.57100  | -0.28000 |
| H  | 0.24600  | -1.39700 | 2.66000  |
| H  | 1.62200  | 4.59000  | -0.22600 |
| H  | 0.30700  | 3.80900  | -1.26600 |
| H  | -0.57000 | 0.87000  | 2.23700  |
| H  | -0.54600 | -2.02900 | 1.13300  |
| O  | -1.81600 | -0.44600 | -0.60200 |
| O  | -3.48000 | -1.97700 | -1.34000 |
| O  | -3.92400 | -0.75700 | 0.56300  |
| P  | 2.98200  | -1.19700 | 0.02600  |
| Pd | 1.00800  | -0.03800 | 0.15400  |

Transition State (3,3'-Elimination):

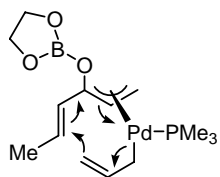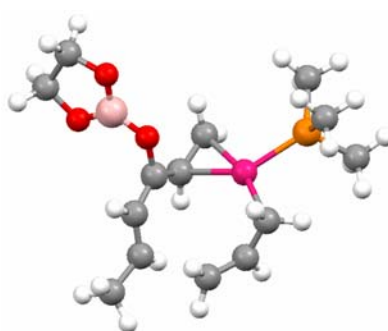

|    |          |          |          |
|----|----------|----------|----------|
| C  | 2.45700  | 4.27900  | -0.05900 |
| H  | 1.85300  | 5.18600  | -0.13400 |
| H  | 3.30900  | 4.40800  | -0.73900 |
| H  | 2.86000  | 4.22600  | 0.95700  |
| B  | 3.04200  | -1.20200 | 0.38000  |
| C  | 1.51600  | 0.55600  | -0.28200 |
| C  | -3.44400 | -1.59400 | 1.83400  |
| C  | -2.87200 | -2.95600 | -0.61600 |
| C  | -4.61600 | -0.68600 | -0.62300 |
| C  | 0.71200  | 0.27000  | -1.40200 |
| C  | 5.12200  | -1.80300 | -0.29500 |
| C  | 4.57700  | -2.83300 | 0.72500  |
| C  | 2.01100  | 1.81300  | 0.11200  |
| C  | 0.06800  | -0.96100 | -1.64700 |
| C  | 1.68100  | 3.04000  | -0.41200 |
| C  | -0.40700 | 3.57300  | 0.74500  |
| C  | -2.01800 | 1.66800  | 1.11000  |
| C  | -1.51300 | 2.81700  | 0.42300  |
| H  | -3.66000 | -0.65700 | 2.35000  |
| H  | -4.31300 | -2.25300 | 1.91200  |
| H  | -2.59600 | -2.06300 | 2.33700  |
| H  | -2.00500 | -3.45900 | -0.18500 |
| H  | -3.76800 | -3.54900 | -0.40400 |
| H  | -2.72600 | -2.90500 | -1.69600 |
| H  | -4.52800 | -0.57400 | -1.70600 |
| H  | -5.41900 | -1.39600 | -0.40400 |
| H  | -4.88200 | 0.28700  | -0.20700 |
| H  | 5.44800  | -2.25900 | -1.23100 |
| H  | 5.94600  | -1.21000 | 0.11300  |
| H  | 4.36000  | -3.80000 | 0.26100  |
| H  | 5.25000  | -2.99400 | 1.56900  |
| H  | 2.66000  | 1.79600  | 0.98600  |
| H  | 1.10800  | 3.08700  | -1.33200 |
| H  | -3.10400 | 1.57800  | 1.10000  |
| H  | -1.60100 | 1.47800  | 2.10000  |
| H  | -2.08800 | 3.14300  | -0.44500 |
| H  | -0.36600 | -1.12500 | -2.62800 |
| H  | -0.27000 | 4.53500  | 0.26900  |
| H  | 0.10700  | 3.42900  | 1.68900  |
| H  | 0.57500  | 1.07900  | -2.11200 |
| H  | 0.40500  | -1.85900 | -1.14000 |
| O  | 1.88000  | -0.52200 | 0.52900  |
| O  | 3.35000  | -2.26400 | 1.20000  |
| O  | 4.01300  | -0.92900 | -0.55600 |
| P  | -3.00000 | -1.24800 | 0.07500  |
| Pd | -1.22500 | 0.15700  | -0.24700 |

Reactant (1,2 addition to simple enone):

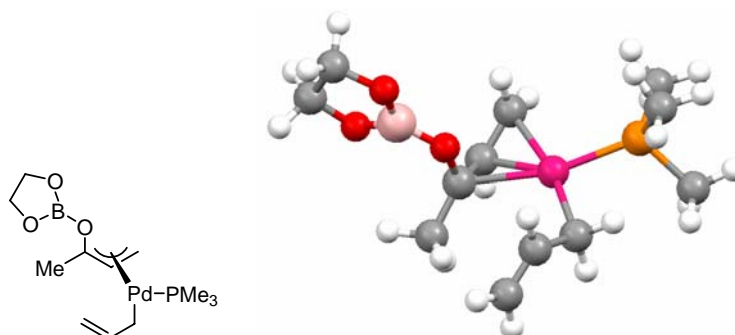

|    |          |          |          |
|----|----------|----------|----------|
| C  | 1.28100  | 0.44700  | -0.93400 |
| C  | 0.66100  | -0.55700 | -1.69600 |
| C  | 0.11200  | -1.73500 | -1.15900 |
| H  | -0.39100 | -2.42200 | -1.82900 |
| H  | 0.52800  | -2.17900 | -0.26000 |
| B  | 3.14300  | -0.35600 | 0.40500  |
| O  | 3.68300  | -0.66400 | 1.63300  |
| O  | 4.01400  | -0.55800 | -0.64400 |
| Pd | -0.97000 | 0.07900  | -0.36400 |
| P  | -2.97800 | -0.82600 | 0.30900  |
| C  | -3.19000 | -0.93900 | 2.13900  |
| H  | -3.07700 | 0.05100  | 2.58400  |
| H  | -4.17200 | -1.34100 | 2.40600  |
| H  | -2.41600 | -1.58400 | 2.55700  |
| C  | -3.38400 | -2.54600 | -0.22700 |
| H  | -2.61500 | -3.23200 | 0.13100  |
| H  | -4.35600 | -2.87000 | 0.15600  |
| H  | -3.39700 | -2.59600 | -1.31700 |
| C  | -4.48700 | 0.09700  | -0.21400 |
| H  | -4.55700 | 0.09600  | -1.30300 |
| H  | -5.39400 | -0.35300 | 0.20000  |
| H  | -4.42000 | 1.13400  | 0.11800  |
| C  | 5.28300  | -0.93200 | -0.08600 |
| H  | 5.66800  | -1.80200 | -0.62200 |
| H  | 5.98200  | -0.10100 | -0.21700 |
| C  | 4.98400  | -1.22100 | 1.40500  |
| H  | 4.95100  | -2.29300 | 1.62100  |
| H  | 5.70000  | -0.75000 | 2.08200  |
| C  | -1.56200 | 2.01900  | 0.38300  |
| H  | -2.35600 | 1.84600  | 1.11800  |
| H  | -1.99700 | 2.55300  | -0.47000 |
| C  | -0.47800 | 2.78800  | 1.01500  |
| H  | -0.10300 | 2.38900  | 1.95900  |
| C  | 0.09500  | 3.91100  | 0.55200  |
| H  | -0.23400 | 4.38100  | -0.37200 |
| H  | 0.89800  | 4.40500  | 1.09000  |
| O  | 1.87000  | 0.09500  | 0.29200  |
| H  | 0.40600  | -0.28300 | -2.71600 |
| C  | 1.78800  | 1.72400  | -1.52100 |
| H  | 2.86800  | 1.66700  | -1.70000 |
| H  | 1.29300  | 1.93700  | -2.47100 |
| H  | 1.59900  | 2.56200  | -0.84300 |

Transition State (1,2 addition to simple enone):

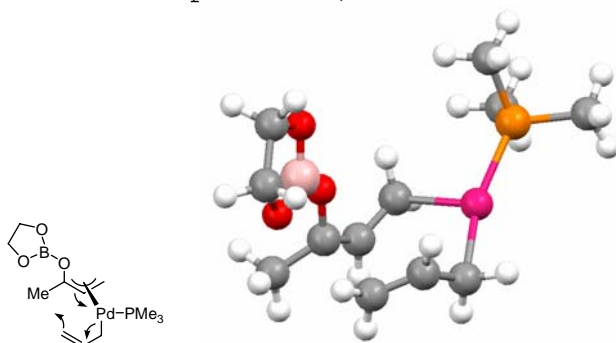

|    |          |          |          |
|----|----------|----------|----------|
| C  | 1.93000  | -1.08900 | 1.16700  |
| C  | 0.65200  | -1.47000 | 1.56800  |
| C  | -0.49700 | -0.67000 | 1.50400  |
| H  | -1.34600 | -1.01400 | 2.09100  |
| H  | -0.33800 | 0.40500  | 1.51200  |
| B  | 3.06400  | 0.92400  | 0.26600  |
| O  | 3.01400  | 2.29500  | 0.12300  |
| O  | 4.19600  | 0.36400  | -0.29300 |
| Pd | -1.58500 | -0.69500 | -0.44600 |
| P  | -3.22000 | 0.91600  | 0.10600  |
| C  | -2.68300 | 2.68800  | 0.11700  |
| H  | -2.30400 | 2.96200  | -0.87000 |
| H  | -3.50200 | 3.36300  | 0.38400  |
| H  | -1.86700 | 2.82100  | 0.83100  |
| C  | -4.02600 | 0.78100  | 1.76700  |
| H  | -3.26700 | 0.84300  | 2.55000  |
| H  | -4.76300 | 1.57300  | 1.93100  |
| H  | -4.52100 | -0.18800 | 1.85800  |
| C  | -4.70200 | 0.99900  | -1.00200 |
| H  | -5.21000 | 0.03200  | -1.00900 |
| H  | -5.41100 | 1.76800  | -0.68300 |
| H  | -4.38400 | 1.21600  | -2.02500 |
| C  | 4.90700  | 1.41100  | -0.97200 |
| H  | 5.96800  | 1.34200  | -0.72600 |
| H  | 4.78700  | 1.27200  | -2.05000 |
| C  | 4.24900  | 2.71600  | -0.46900 |
| H  | 4.85300  | 3.21700  | 0.29400  |
| H  | 4.04100  | 3.42500  | -1.27200 |
| C  | -0.37400 | -2.14000 | -1.47000 |
| H  | -1.05600 | -1.98900 | -2.32100 |
| H  | -0.48700 | -3.11700 | -1.00000 |
| C  | 0.94000  | -1.65600 | -1.62700 |
| H  | 1.08200  | -0.79600 | -2.28000 |
| C  | 2.02600  | -2.09700 | -0.88900 |
| H  | 1.98900  | -3.07800 | -0.42800 |
| H  | 3.01700  | -1.71900 | -1.10700 |
| O  | 2.06700  | 0.27200  | 0.90400  |
| H  | 0.54400  | -2.51100 | 1.86100  |
| C  | 3.15300  | -1.77500 | 1.72600  |
| H  | 3.43300  | -1.31100 | 2.68000  |
| H  | 2.94000  | -2.82700 | 1.91900  |
| H  | 4.01300  | -1.71000 | 1.06000  |



Reactant (1,4 addition to simple enone):

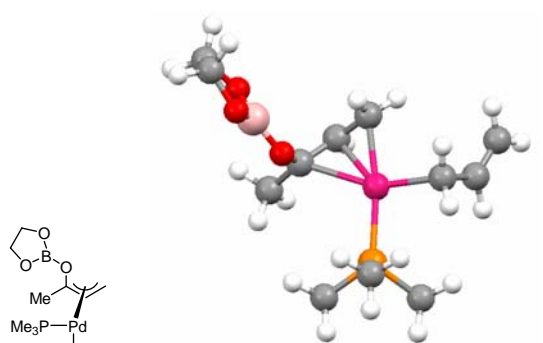

|    |          |          |          |
|----|----------|----------|----------|
| C  | 1.24400  | -0.18500 | 1.10300  |
| C  | 0.77800  | 1.11000  | 1.28600  |
| C  | 0.48700  | 2.02000  | 0.23200  |
| H  | 0.07900  | 2.98900  | 0.49400  |
| H  | 1.07400  | 1.99600  | -0.68200 |
| B  | 3.22600  | -0.25000 | -0.28500 |
| O  | 3.85300  | -0.60000 | -1.45800 |
| O  | 4.05300  | 0.37900  | 0.61800  |
| Pd | -0.92400 | 0.39700  | 0.05000  |
| P  | -2.15200 | -1.57600 | -0.16700 |
| C  | -3.95100 | -1.47300 | 0.23400  |
| H  | -4.41800 | -0.68400 | -0.35700 |
| H  | -4.46400 | -2.41800 | 0.02900  |
| H  | -4.08100 | -1.22300 | 1.28900  |
| C  | -1.64900 | -3.07900 | 0.78400  |
| H  | -1.70200 | -2.87800 | 1.85600  |
| H  | -2.28800 | -3.93600 | 0.55400  |
| H  | -0.61600 | -3.33700 | 0.54000  |
| C  | -2.17500 | -2.22800 | -1.89300 |
| H  | -1.15700 | -2.46400 | -2.20800 |
| H  | -2.79200 | -3.12700 | -1.98000 |
| H  | -2.56300 | -1.46500 | -2.57000 |
| C  | 5.37600  | 0.38400  | 0.05900  |
| H  | 5.80000  | 1.38600  | 0.14900  |
| H  | 5.99800  | -0.31300 | 0.62800  |
| C  | 5.18300  | -0.06300 | -1.41100 |
| H  | 5.24700  | 0.77500  | -2.11100 |
| H  | 5.89200  | -0.83300 | -1.71900 |
| C  | -2.29100 | 1.56300  | -1.09500 |
| H  | -2.89900 | 0.88200  | -1.69800 |
| H  | -1.69800 | 2.18400  | -1.77100 |
| C  | -3.12800 | 2.37500  | -0.19100 |
| H  | -3.89900 | 1.83400  | 0.36200  |
| C  | -3.03500 | 3.69600  | 0.02700  |
| H  | -2.30000 | 4.30900  | -0.48800 |
| H  | -3.68800 | 4.20600  | 0.72900  |
| O  | 1.91400  | -0.53100 | -0.07900 |
| H  | 0.40700  | 1.33900  | 2.28200  |
| C  | 1.44000  | -1.16900 | 2.21700  |
| H  | 2.48700  | -1.17500 | 2.54900  |
| H  | 0.81400  | -0.91800 | 3.07600  |
| H  | 1.19600  | -2.18400 | 1.89800  |

Transition State (1,4 addition to simple enone):

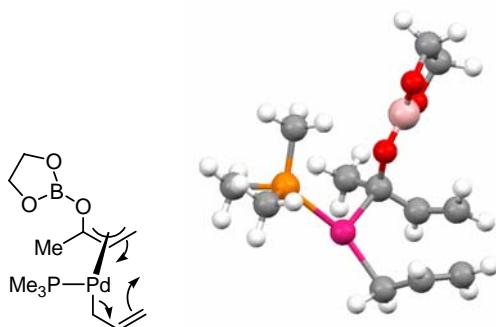

|    |          |          |          |
|----|----------|----------|----------|
| C  | 0.00000  | 0.00000  | 0.00000  |
| C  | 1.42700  | 0.00000  | 0.00000  |
| C  | 2.25600  | 1.09300  | 0.00000  |
| H  | 3.30300  | 0.97200  | -0.24400 |
| H  | 1.85800  | 2.09500  | -0.09800 |
| B  | -0.59700 | 1.67300  | -1.70400 |
| O  | -1.09100 | 2.92900  | -1.99700 |
| O  | -0.15600 | 0.99200  | -2.81900 |
| Pd | -0.59400 | -0.02300 | 2.11800  |
| P  | -2.95300 | 0.30000  | 1.96800  |
| C  | -4.05700 | -1.18600 | 1.88500  |
| H  | -3.82900 | -1.86000 | 2.71400  |
| H  | -5.11500 | -0.91100 | 1.93400  |
| H  | -3.88000 | -1.73200 | 0.95600  |
| C  | -3.68700 | 1.37200  | 0.65500  |
| H  | -3.57500 | 0.89500  | -0.32000 |
| H  | -4.75000 | 1.55700  | 0.83800  |
| H  | -3.15200 | 2.32100  | 0.61600  |
| C  | -3.59900 | 1.12300  | 3.49800  |
| H  | -3.12900 | 2.10100  | 3.61300  |
| H  | -4.68500 | 1.25500  | 3.46000  |
| H  | -3.34800 | 0.52500  | 4.37700  |
| C  | -0.21700 | 1.89800  | -3.93000 |
| H  | 0.80100  | 2.21000  | -4.18400 |
| H  | -0.65100 | 1.38500  | -4.79000 |
| C  | -1.08200 | 3.07400  | -3.42300 |
| H  | -0.67000 | 4.05100  | -3.68300 |
| H  | -2.11200 | 3.01900  | -3.79100 |
| C  | 1.29800  | -0.13000 | 3.14900  |
| H  | 1.89000  | -1.01300 | 2.91000  |
| H  | 0.69500  | -0.26200 | 4.06100  |
| C  | 1.93200  | 1.12600  | 2.99400  |
| H  | 1.42200  | 1.99800  | 3.40000  |
| C  | 3.05200  | 1.33500  | 2.22100  |
| H  | 3.71700  | 0.50900  | 1.99800  |
| H  | 3.47700  | 2.32700  | 2.11200  |
| O  | -0.60500 | 1.21300  | -0.43100 |
| H  | 1.87800  | -0.98800 | 0.05700  |
| C  | -0.67700 | -1.23100 | -0.58500 |
| H  | -0.49900 | -1.27600 | -1.66600 |
| H  | -0.28100 | -2.14100 | -0.13100 |
| H  | -1.75500 | -1.21300 | -0.42300 |

## REFERENCES

- (1) A. D. Becke, *J. Chem. Phys.* **98**, 1372 (1993).
- (2) C. Lee, W. Yang, and R. G. Parr, *Phys. Rev. B* **37**, 785(1988).
- (3) Bergner A, Dolg M, Kuechle W, Stoll H, Preuss H. *Mol. Phys.* 80, 1431(1993).
- (4) R. Krishnan, J. S. Binkley, R. Seeger and J. A. Pople, *J. Chem. Phys.* **72**, 650 (1980).
- (5) M. J. Frisch, G. W. Trucks, H. B. Schlegel, G. E. Scuseria, M. A. Robb, J. R. Cheeseman, J. A. Montgomery, Jr., T. Vreven, K. N. Kudin, J. C. Burant, J. M. Millam, S. S. Iyengar, J. Tomasi, V. Barone, B. Mennucci, M. Cossi, G. Scalmani, N. Rega, G. A. Petersson, H. Nakatsuji, M. Hada, M. Ehara, K. Toyota, R. Fukuda, J. Hasegawa, M. Ishida, T. Nakajima, Y. Honda, O. Kitao, H.

Nakai, M. Klene, X. Li, J. E. Knox, H. P. Hratchian, J. B. Cross, C. Adamo, J. Jaramillo, R. Gomperts, R. E. Stratmann, O. Yazyev, A. J. Austin, R. Cammi, C. Pomelli, J. W. Ochterski, P. Y. Ayala, K. Morokuma, G. A. Voth, P. Salvador, J. J. Dannenberg, V. G. Zakrzewski, S. Dapprich, A. D. Daniels, M. C. Strain, O. Farkas, D. K. Malick, A. D. Rabuck, K. Raghavachari, J. B. Foresman, J. V. Ortiz, Q. Cui, A. G. Baboul, S. Clifford, J. Cioslowski, B. B. Stefanov, G. Liu, A. Liashenko, P. Piskorz, I. Komaromi, R. L. Martin, D. J. Fox, T. Keith, M. A. Al-Laham, C. Y. Peng, A. Nanayakkara, M. Challacombe, P. M. W. Gill, B. Johnson, W. Chen, M. W. Wong, C. Gonzalez, and J. A. Pople, Gaussian, Inc., Wallingford CT, 2004.

(6) <http://its.unc.edu/hpc/hardware/#Cedar/Cypress|outline>

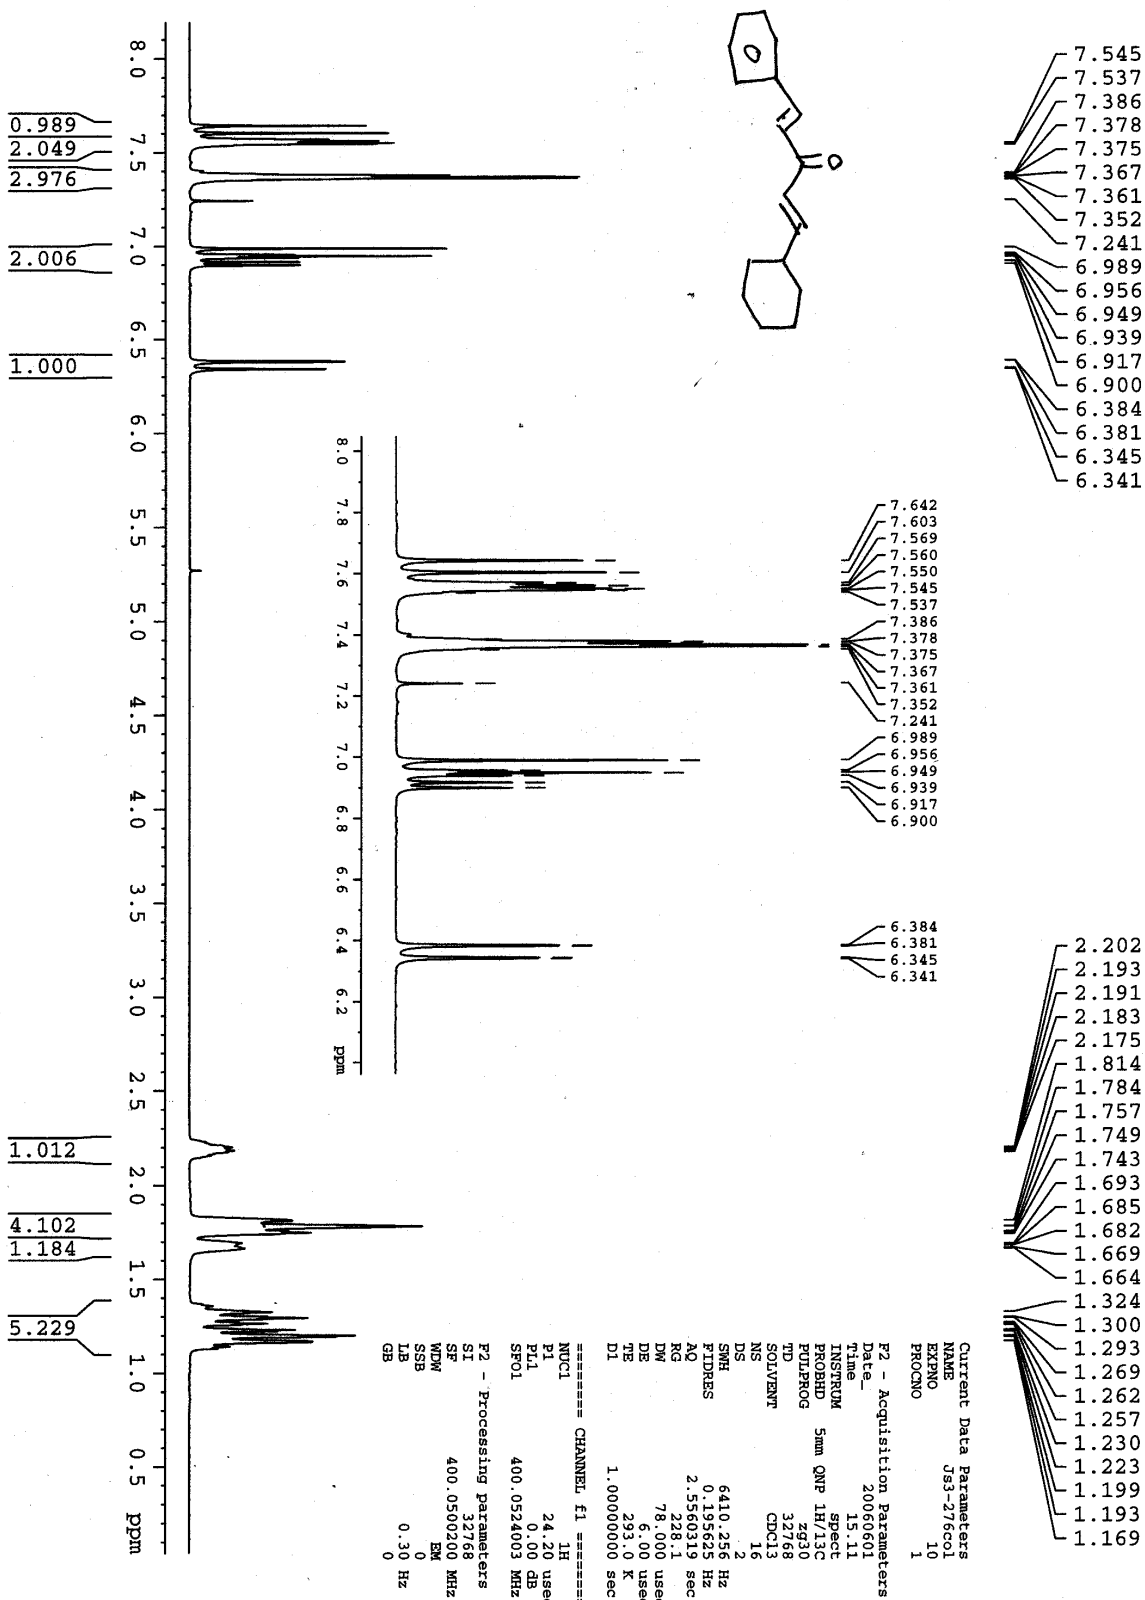

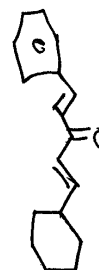

JS3-276 column

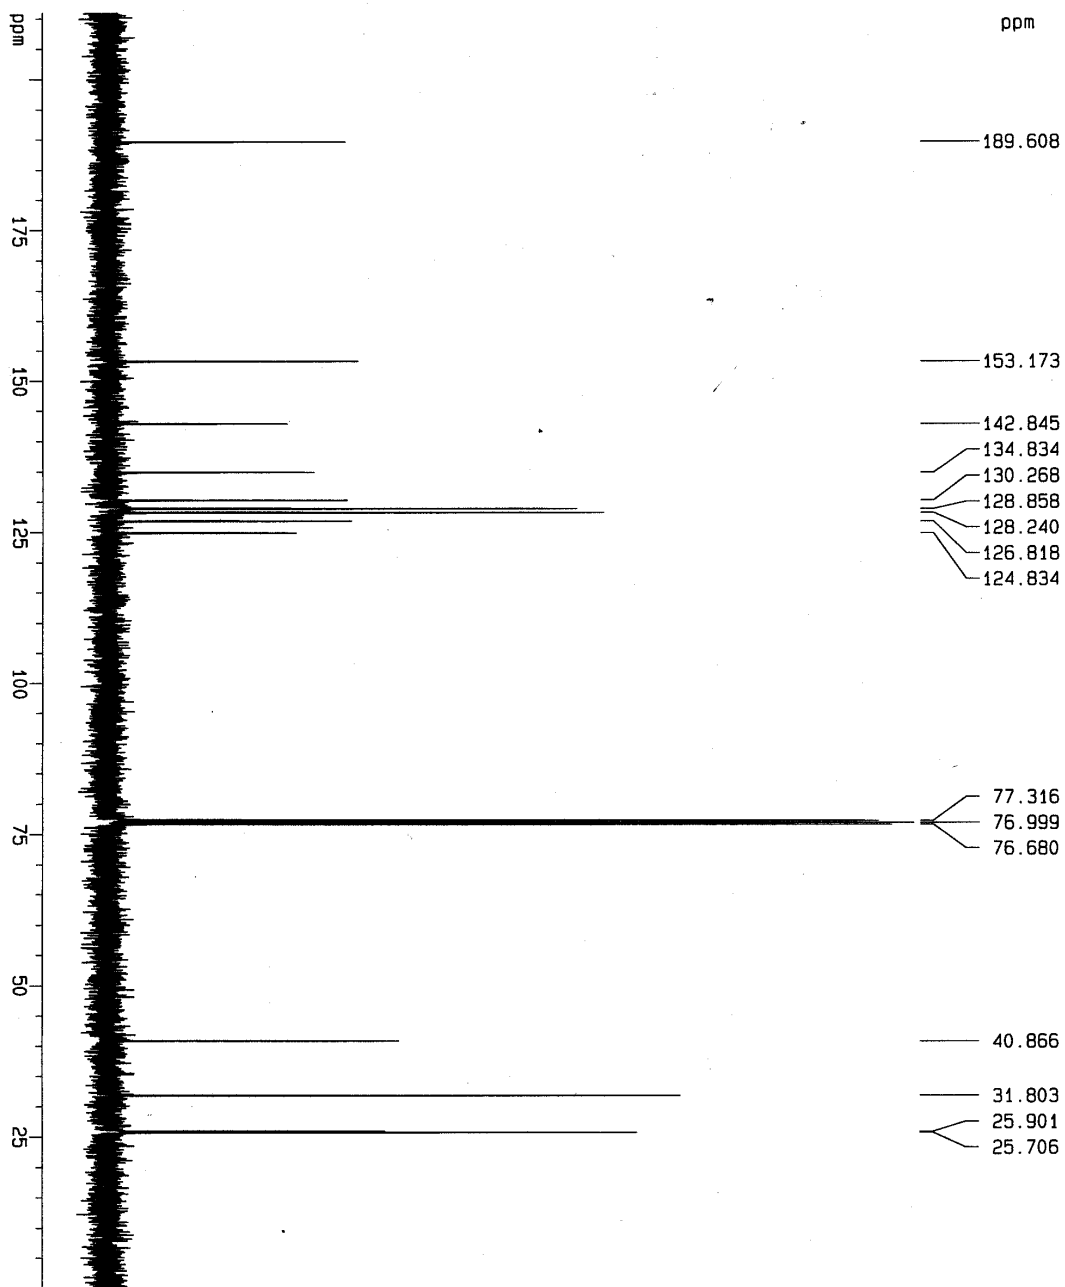

Current Data Parameters  
 NAME JS3-276c01  
 EXPNO 11  
 PROCNO 1

F2 - Acquisition Parameters  
 Date\_ 20060601  
 Time 15.15  
 INSTRUM spect  
 PROBHD 5mm QNP 1H/13C  
 PULPROG zgpg30  
 TD 65536  
 SOLVENT CDCl3  
 NS 81  
 DS 2  
 SWH 26246.719 Hz  
 FIDRES 0.400493 Hz  
 AQ 1.2485298 sec  
 RG 3649.1  
 DW 19.050 usec  
 DE 6.00 usec  
 TE 300.0 K  
 D1 0.80000001 sec  
 d11 0.03000000 sec  
 d12 0.00020000 sec

\*\*\*\*\* CHANNEL f1 \*\*\*\*\*  
 NUC1 13C  
 P1 6.00 usec  
 PL1 0.00 dB  
 SF01 100.6036782 MHz

\*\*\*\*\* CHANNEL f2 \*\*\*\*\*  
 CPDPRG2 waltz16  
 NUC2 1H  
 PCPD2 80.00 usec  
 PL2 -6.00 dB  
 PL12 13.80 dB  
 PL13 14.50 dB  
 SF02 400.0516002 MHz

F2 - Processing parameters  
 SI 32768  
 SF 100.5926597 MHz  
 WDW EM  
 SSB 0  
 LB 1.00 Hz  
 GB 0  
 PC 1.40

1D NMR plot parameters  
 CX 20.00 cm  
 CY 12.50 cm  
 F1p 210.967 ppm  
 F1 21221.71 Hz  
 F2p -0.092 ppm  
 F2 -9.28 Hz  
 PH0CM 10.55235 ppm/cm  
 HZCM 1061.54919 Hz/cm

JS4-6 column

7.652  
7.612  
7.576  
7.567  
7.565  
7.557  
7.552  
7.377  
7.375  
7.366  
7.361  
7.003  
6.963  
6.341  
6.301

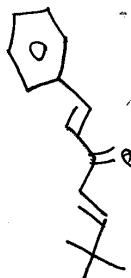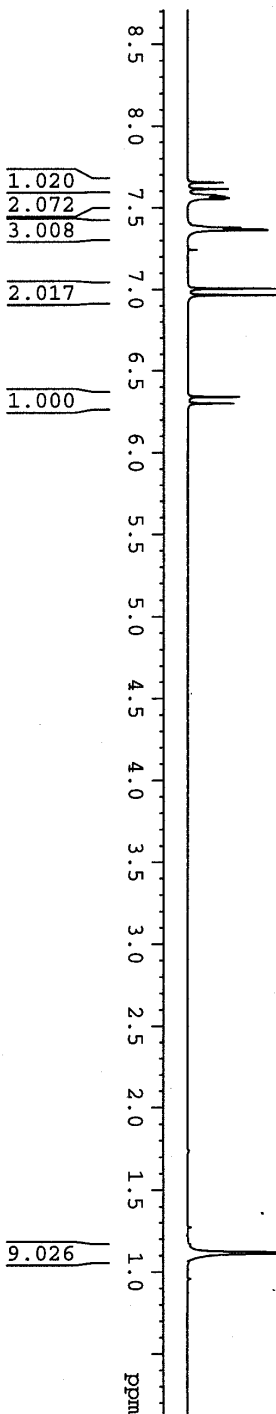

Current Data Parameters  
NAME JS4-6col  
EXPNO 10  
PROCNO 1

F2 - Acquisition Parameters

Date\_ 20060601  
Time 15.22  
INSTRUM spect  
PROBHD 5mm QNP 1H/13C  
PULPROG zg30  
TD 32768  
SOLVENT CDCl3  
NS 16  
DS 2  
SWH 6410.256 Hz  
FIDRES 0.195625 Hz  
AQ 2.5560319 sec  
RG 161.3  
DM 78.000 usec  
DE 6.00 usec  
TE 293.0 K  
D1 1.00000000 sec

===== CHANNEL f1 =====

NUC1 1H  
P1 24.20 usec  
PL1 0.00 dB  
SFO1 400.0524003 MHz

F2 - Processing Parameters

SI 32768  
SF 400.0500200 MHz  
WDW EM  
SSB 0  
LB 0.30 Hz  
GB 0

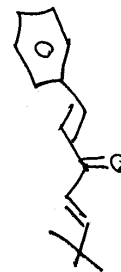

Js4-6 column

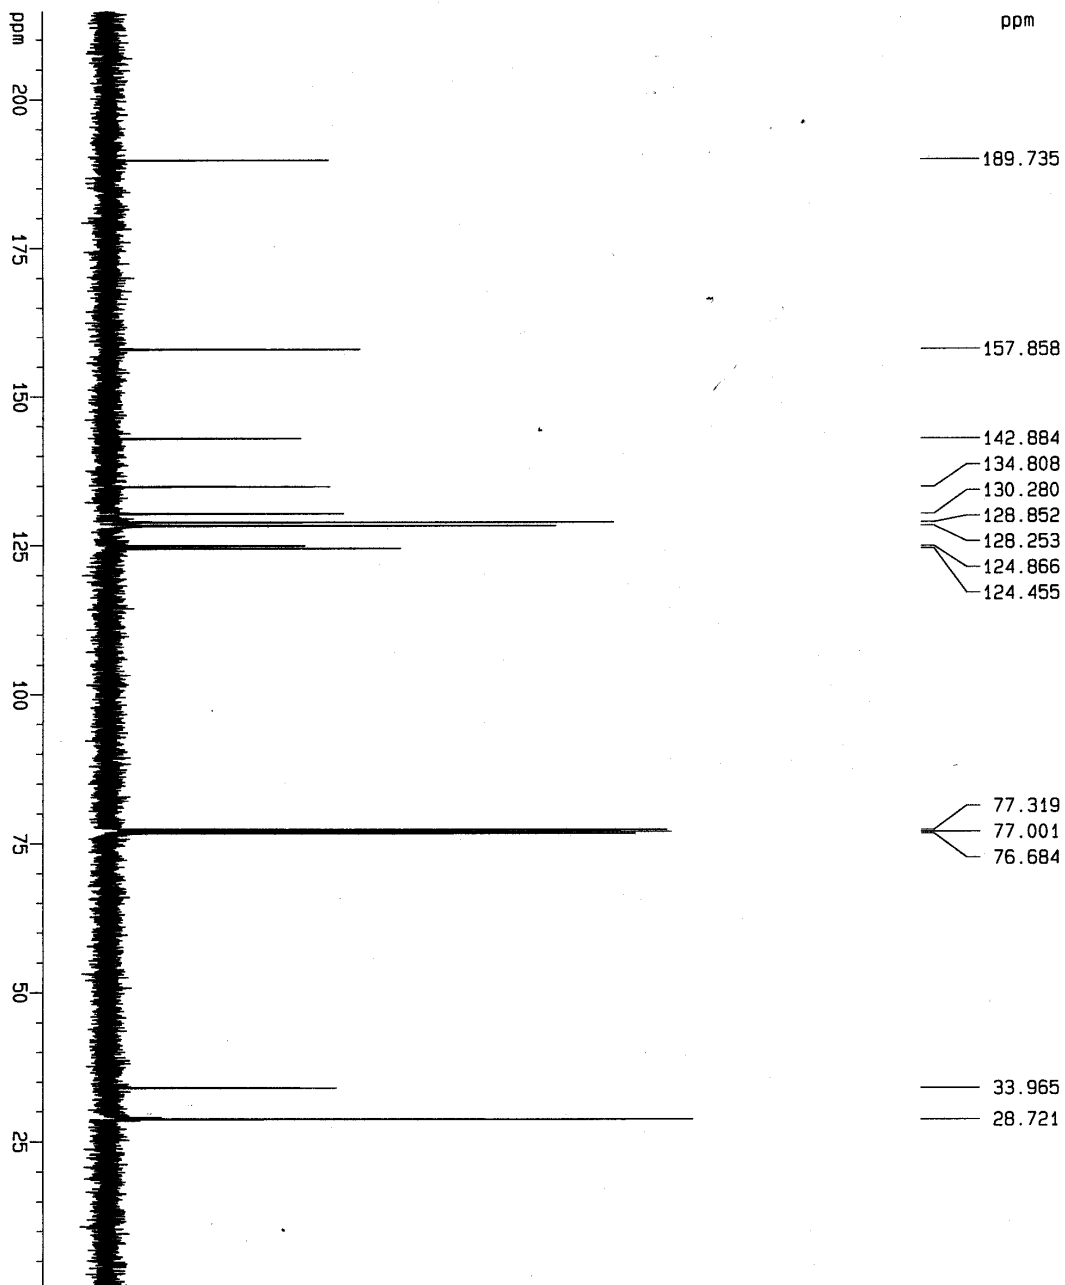

Current Data Parameters  
NAME Js4-6c01  
EXPNO 11  
PROCNO 1

F2 - Acquisition Parameters  
Date\_ 20060601  
Time 15.24

INSTRUM spect  
PROBHD 5mm QNP 1H/13C  
PULPROG zgpg30  
TD 65536  
SOLVENT CDCl3  
NS 51  
DS 2  
SWH 26246.719 Hz  
FIDRES 0.400493 Hz  
AQ 1.2485298 sec  
RG 6502  
DM 19.050 usec  
DE 6.00 usec  
TE 300.0 K  
D1 0.80000001 sec  
d11 0.03000000 sec  
d12 0.00020000 sec

\*\*\*\*\* CHANNEL f1 \*\*\*\*\*  
NUC1 13C  
P1 6.00 usec  
PL1 0.00 dB  
SF01 100.6036782 MHz

\*\*\*\*\* CHANNEL f2 \*\*\*\*\*  
CPDPRG2 waltz16  
NUC2 1H  
PCPD2 80.00 usec  
PL2 -6.00 dB  
PL12 13.80 dB  
PL13 14.50 dB  
SF02 400.0516002 MHz

F2 - Processing parameters  
SI 32768  
SF 100.5826605 MHz  
WDW EM  
SSB 0  
LB 1.00 Hz  
GB 0  
PC 1.40

1D NMR plot parameters  
CX 20.00 cm  
CY 9.00 cm  
F1P 214.715 ppm  
F1 21598.80 Hz  
F2P 0.583 ppm  
F2 58.63 Hz  
PRACH 10.70663 ppm/cm  
HZCM 1077.00867 Hz/cm

Js4-19 column

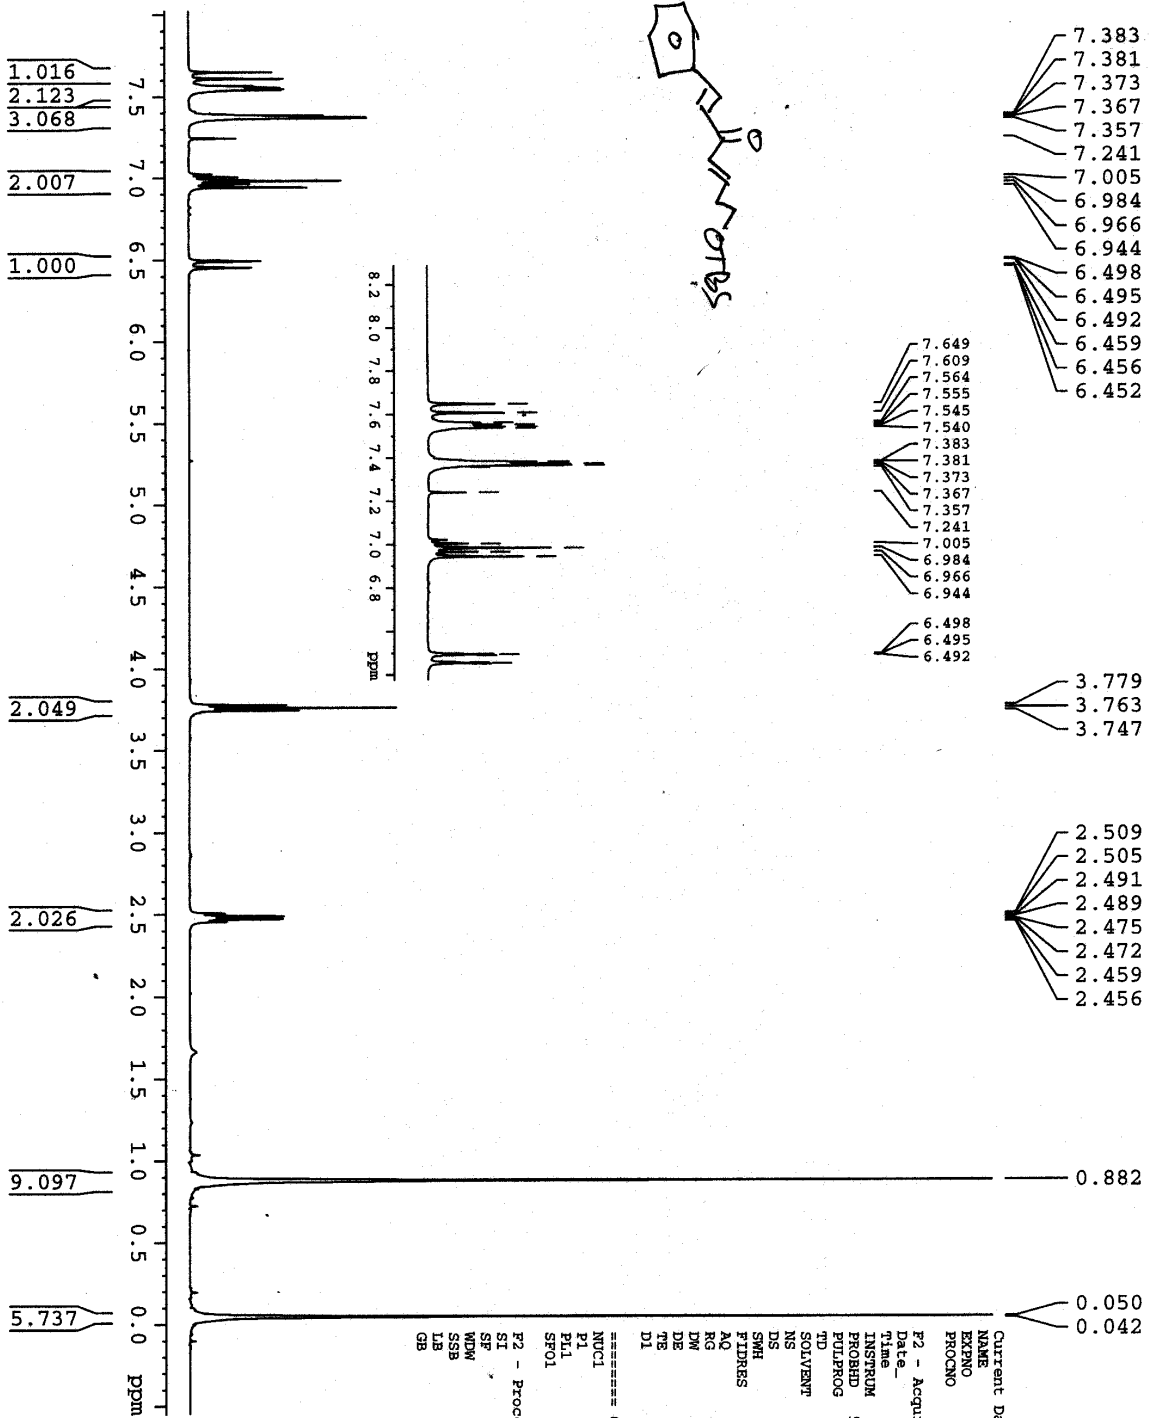



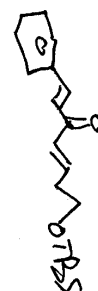

Js4-19 column

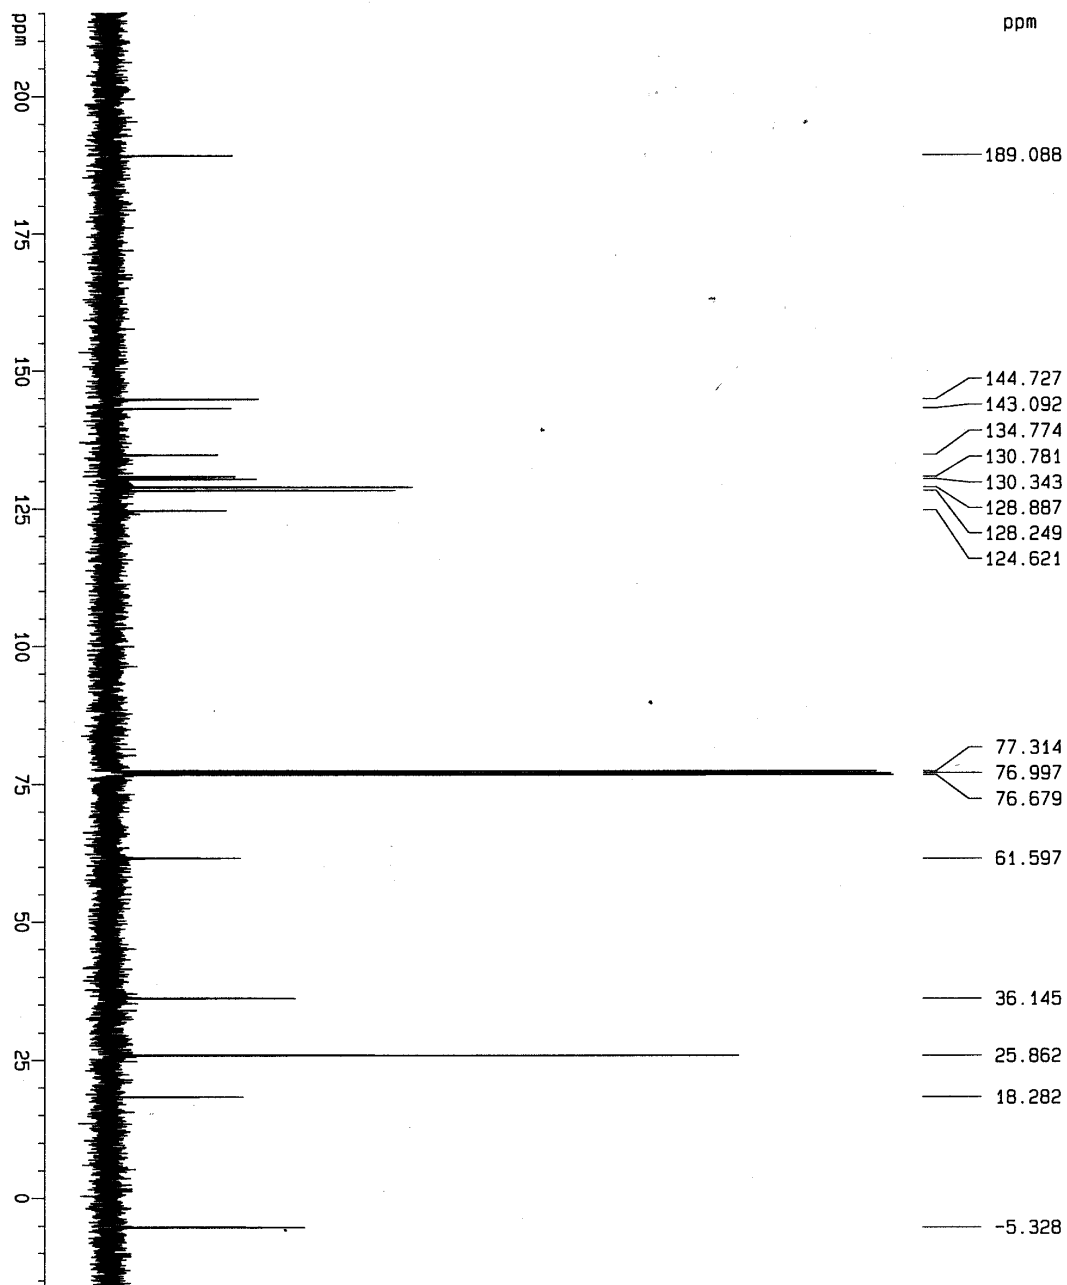

Current Data Parameters  
NAME Js4-19c01  
EXPNO 11  
PROCNO 1

F2 - Acquisition Parameters  
Date\_ 20060602  
Time 15.45  
INSTRUM spect  
PROBHD 5mm QNP 1H/13C  
PULPROG zgpg30  
TD 65536  
SOLVENT CDCl3  
NS 70  
DS 2  
SWH 26246.719 Hz  
FIDRES 0.400493 Hz  
AQ 1.2485298 sec  
RG 7298.2  
DM 19.050 usec  
DE 6.00 usec  
TE 300.0 K  
D1 0.8000001 sec  
d11 0.0300000 sec  
d12 0.0002000 sec

===== CHANNEL f1 =====  
NUC1 13C  
P1 6.00 usec  
PL1 0.00 dB  
SFO1 100.6036782 MHz

===== CHANNEL f2 =====  
COPRPG2 waltz16  
NUC2 1H  
PCPD2 80.00 usec  
PL2 -6.00 dB  
PL12 13.80 dB  
PL13 14.50 dB  
SFO2 400.0516002 MHz

F2 - Processing parameters  
SI 32768  
SF 100.5925589 MHz  
WDW EM  
SSB 0  
LB 1.00 Hz  
GB 0  
PC 1.40

1D NMR plot parameters  
CX 20.00 cm  
CY 12.50 cm  
F1p 215.073 ppm  
F1 21634.76 Hz  
F2p -16.477 ppm  
F2 -1657.49 Hz  
PRHCH 11.57751 ppm/cm  
HZCM 1164.61243 Hz/cm

Js4-37 column

Current Data Parameters  
NAME Js4-37col  
EXPNO 20  
PROCNO 1

F2 - Acquisition Parameters

7.358  
7.241  
7.043  
7.034  
7.026  
7.004  
6.996  
6.987  
6.969  
6.929  
6.754  
6.749  
6.744  
6.716  
6.710  
6.705

4.413  
4.407  
4.405  
4.399

0.940  
0.911  
0.896  
0.833

0.098  
0.076  
0.067

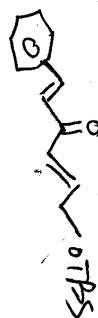

===== CHANNEL f1 =====  
NUC1 1H  
P1 24.20 usec  
PL1 0.00 dB  
SFO1 400.0524003 MHz  
F2 - Processing parameters  
SI 32768  
SF 400.0500200 MHz  
WDW EM  
SSB 0  
LB 0.30 Hz  
GB 0

===== CHANNEL f2 =====  
DS 2  
SWH 6410.256 Hz  
FIDRES 0.195625 Hz  
AQ 2.5559540 sec  
RG 161.3  
RW 78.000 usec  
DR 6.00 usec  
TE 293.0 K  
D1 1.00000000 sec

===== Acquisition Parameters =====  
Date\_ 20060605  
Time 15.24  
INSTRUM spect  
PROBHD 5mm QNP 1H/13C  
PULPROG zg30  
TD 32768  
FIDRES 0.195625  
SOLVENT CDCl<sub>3</sub>  
NS 16  
DS 2

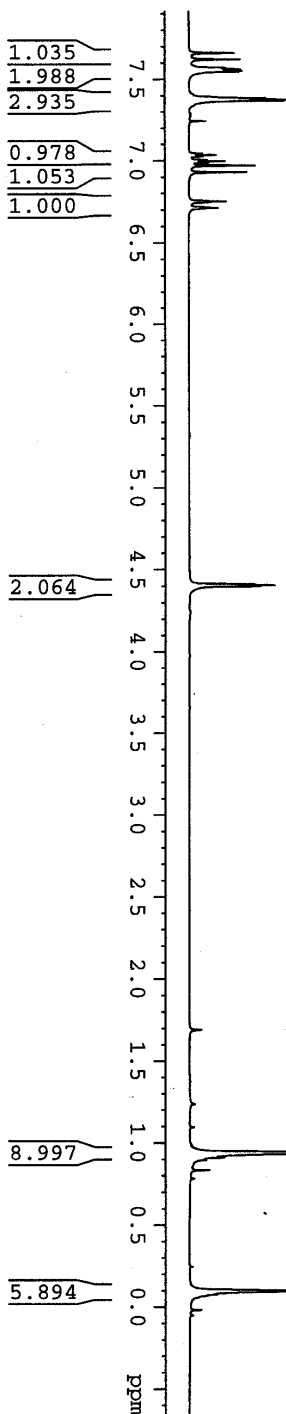

## Js4-37 column

Current Data Parameters  
NAME Js4-37col  
EXPNO 101  
PROCNO 1

189.051

146.022

143.304

134.744

130.386

128.884

128.292

126.542

125.288

77.315

76.998

76.679

62.516

25.855

18.369

-5.407

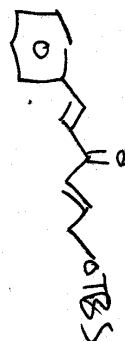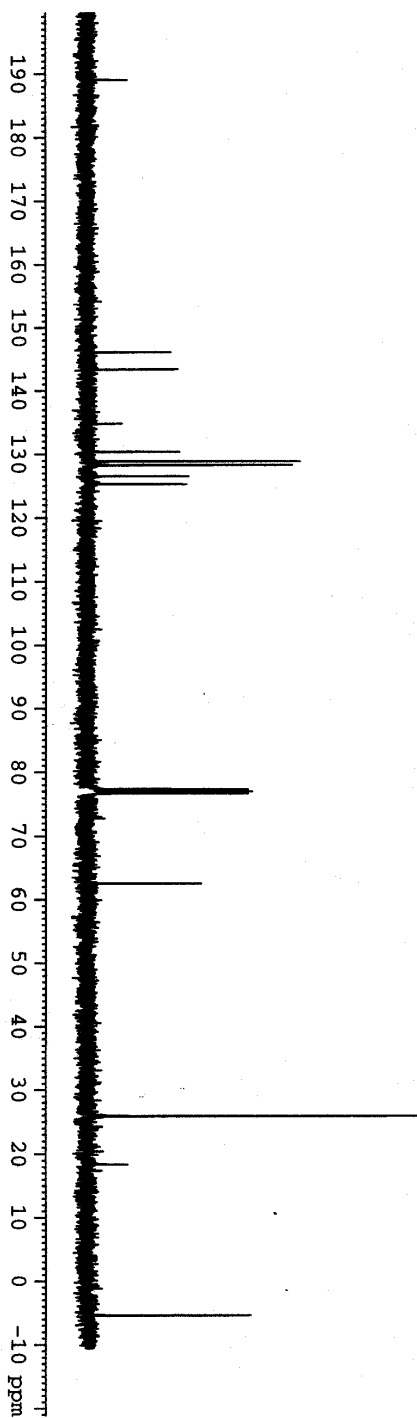

F2 - Acquisition Parameters  
Date\_ 20060605  
Time 17.58  
INSTRUM 5 mm HR 13C/31  
PROBHD spect  
PULPROG zgpg30  
TD 65536  
SOLVENT CDCl3  
NS 114  
DS 2  
SWH 26178.010 Hz  
FIDRES 0.399445 Hz  
AQ 1.2517875 sec  
RG 13004  
DW 19.100 use  
DE 32.36 use  
TE 300.0 K  
D1 1.00000000 sec  
d11 0.03000000 sec  
d12 0.0002000 sec

===== CHANNEL f1 =====  
NUC1 13C  
P1 7.25 use  
PL1 0.00 dB  
SFO1 100.5418136 MHz

===== CHANNEL f2 =====  
CPDPRG2 waltz16  
NUC2 1H  
PCPD2 90.00 use  
PL2 -3.00 dB  
PL12 18.90 dB  
PL13 22.00 dB  
SFO2 399.8015992 MHz

F2 - Processing Parameters  
SI 65536  
SF 100.5297955 MHz  
WDW EM  
SSB 0

JS4-49 column

7.605  
7.565  
7.559  
7.552  
7.550  
7.540  
7.536  
7.385  
7.382  
7.372  
7.363  
7.357  
7.350  
7.346  
7.297  
7.258  
7.241  
6.839  
6.824  
6.809  
6.793

1.900  
1.884

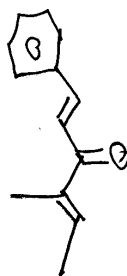

Current Data Parameters  
NAME JS4-49col  
EXPNO 100  
PROCNO 1  
F2 - Acquisition Parameters  
Date\_ 20060601  
Time 15.54  
INSTRUM spect  
PROBHD 5mm QNP 1H/13C  
PULPROG zg30  
TD 32768  
SOLVENT CDCl3  
NS 16  
DS 2  
SWH 6410.256 Hz  
FIDRES 0.195625 Hz  
AQ 2.5560319 sec  
RG 203.2  
DM 78.000 usec  
DE 6.00 usec  
TE 293.0 K  
D1 1.00000000 sec  
===== CHANNEL f1 =====  
NUC1 1H  
P1 24.20 usec  
PL1 0.00 dB  
SFO1 400.0524003 MHz  
F2 - Processing parameters  
SI 32768  
SF 400.0500200 MHz  
WDW EM  
SSB 0  
LB 0.30 Hz  
GB 0

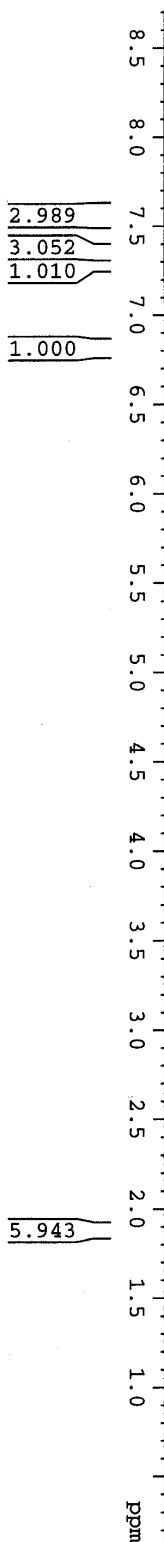

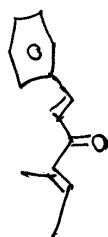

Js4-49 column

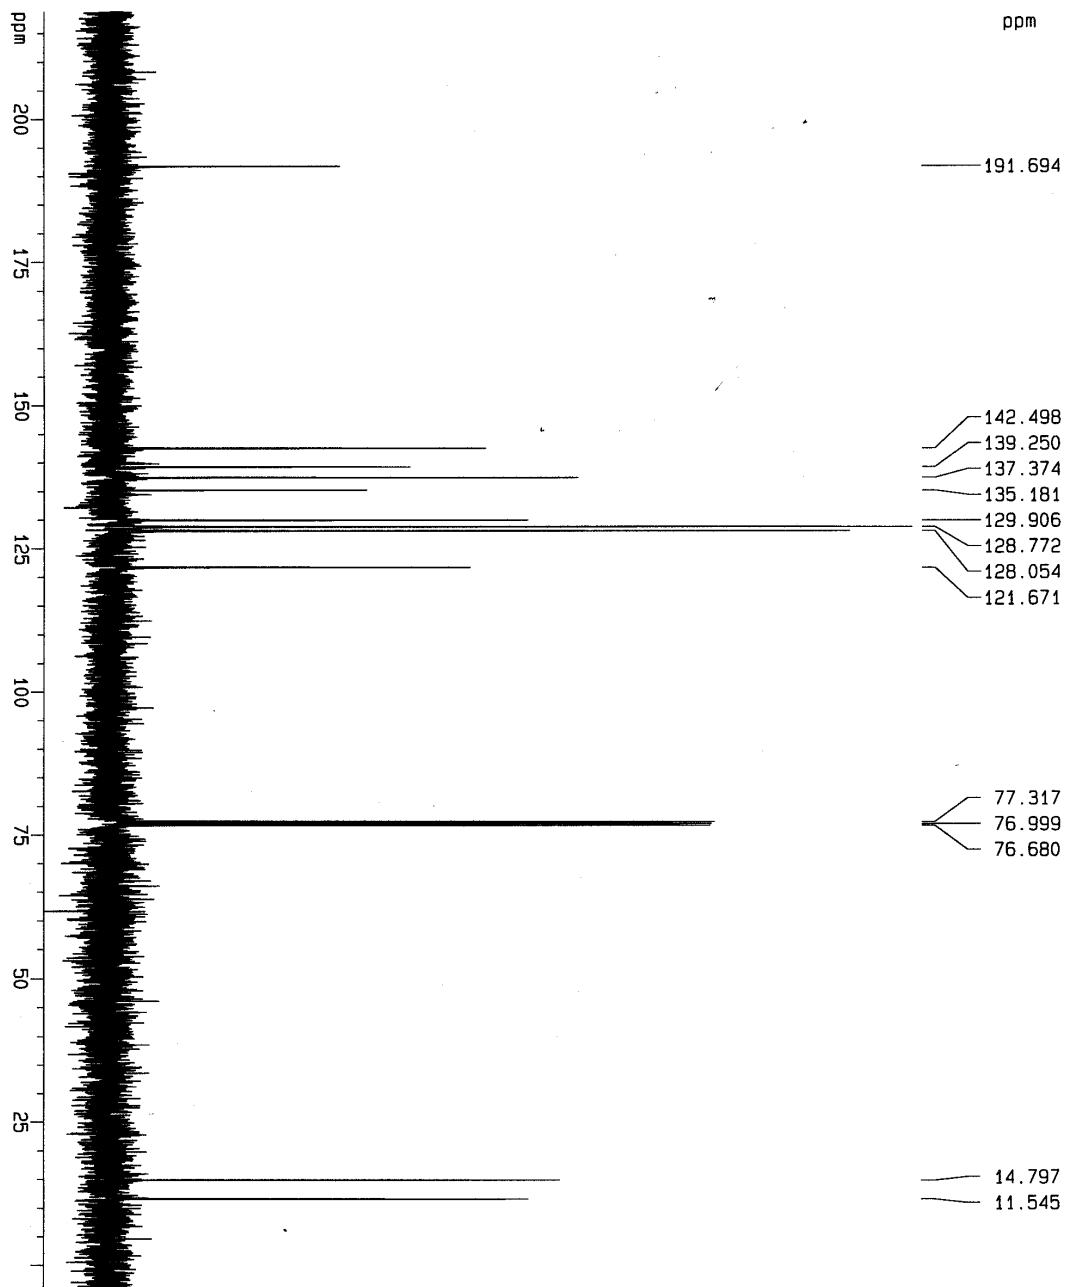

Current Data Parameters  
 NAME Js4-49c01  
 EXPNO 101  
 PROCNO 1

F2 - Acquisition Parameters  
 Date\_ 20060601  
 Time 15.56  
 INSTRUM spect  
 PROBRD 5mm QNP 1H/13C  
 PULPROG zgpg30  
 TD 65536  
 SOLVENT CDCl3  
 NS 55  
 DS 2  
 SWH 26246.719 Hz  
 FIDRES 0.400493 Hz  
 AQ 1.2485298 sec  
 RG 5792.6  
 DW 19.050 usec  
 DE 6.00 usec  
 TE 300.0 K  
 D1 0.80000001 sec  
 d11 0.03000000 sec  
 d12 0.00002000 sec

\*\*\*\*\* CHANNEL f1 \*\*\*\*\*  
 NUC1 13C  
 P1 6.00 usec  
 PL1 0.00 dB  
 SF01 100.6036782 MHz

\*\*\*\*\* CHANNEL f2 \*\*\*\*\*  
 CPDPRG2 waltz16  
 NUC2 1H  
 PCPD2 80.00 usec  
 PL2 -6.00 dB  
 PL12 13.80 dB  
 PL13 14.50 dB  
 SF02 400.0516002 MHz

F2 - Processing parameters  
 SI 32768  
 SF 100.5926613 MHz  
 WDW EM  
 SSB 0  
 LB 1.00 Hz  
 GB 0  
 PC 1.40

1D NMR plot parameters  
 CX 20.00 cm  
 CY 12.50 cm  
 F1P 218.806 ppm  
 F1 22010.25 Hz  
 F2P -3.865 ppm  
 F2 -388.78 Hz  
 PPMCH 11.13353 ppm/cm  
 HZCM 1119.95154 Hz/cm

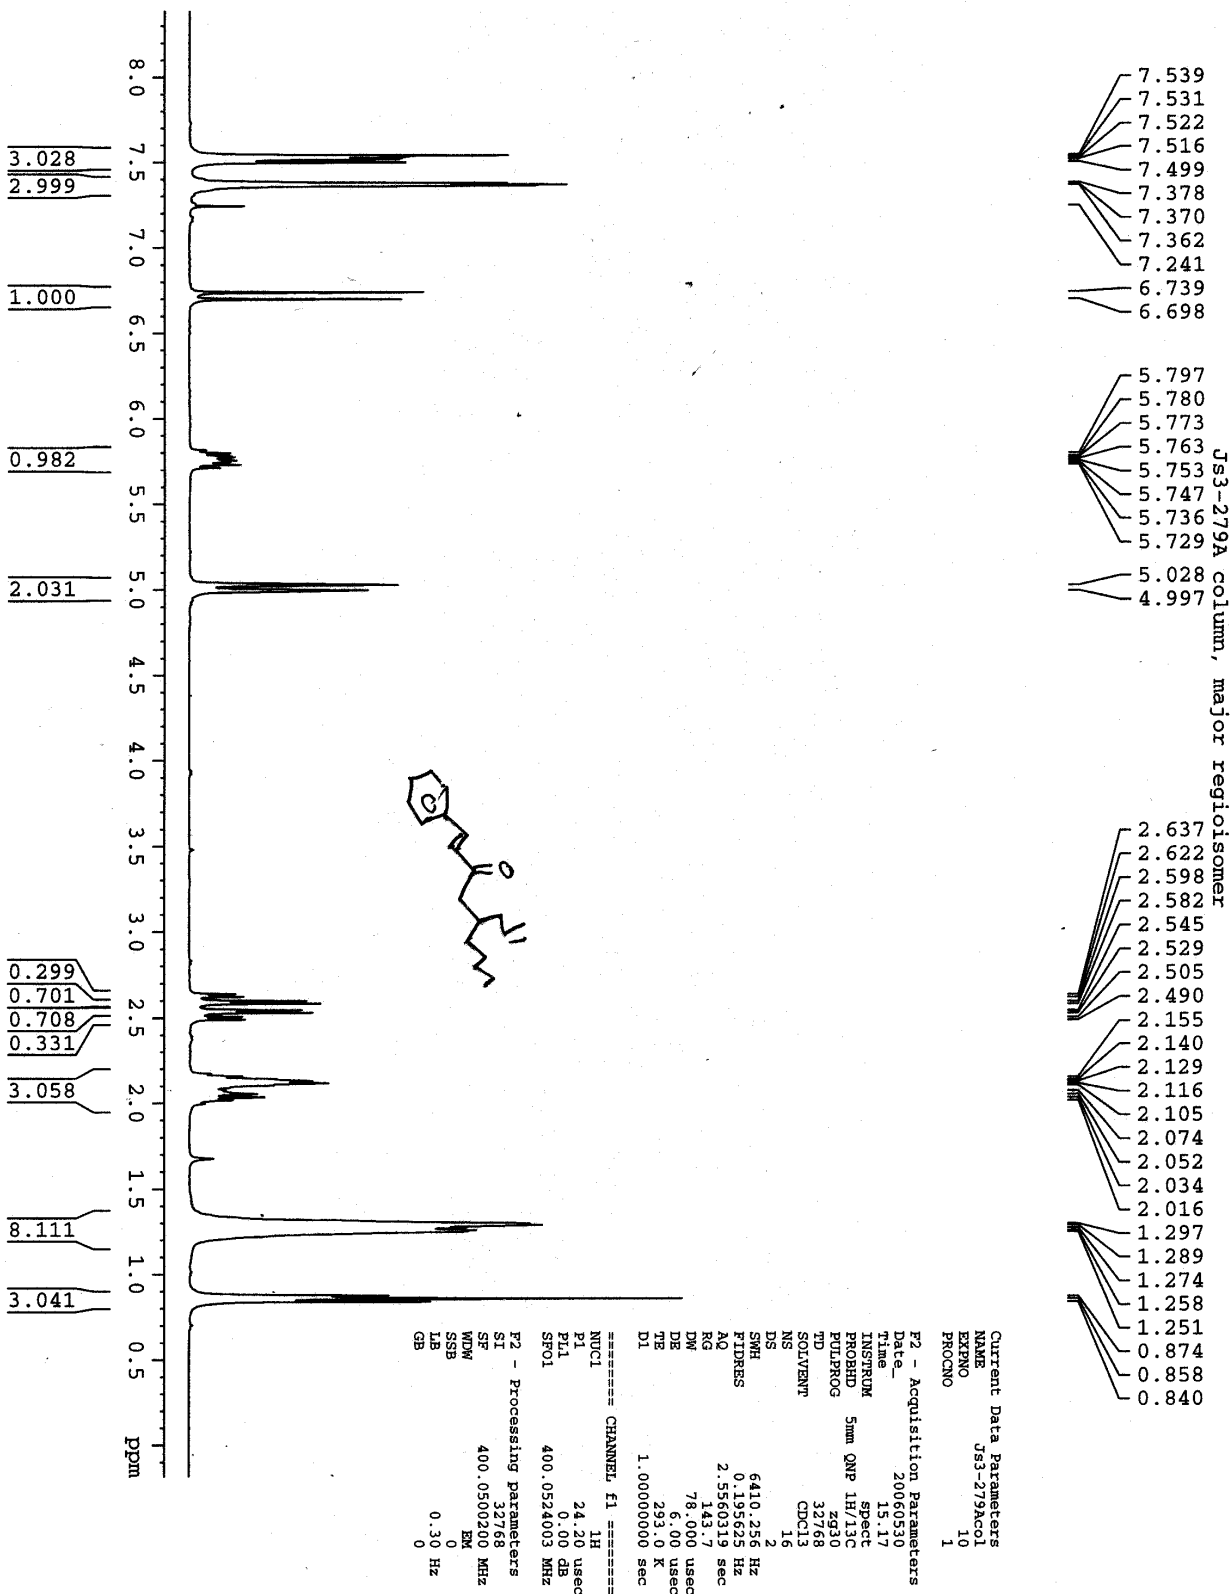

JS3-279A column, major regioisomer

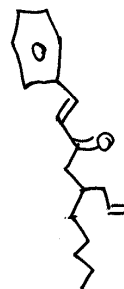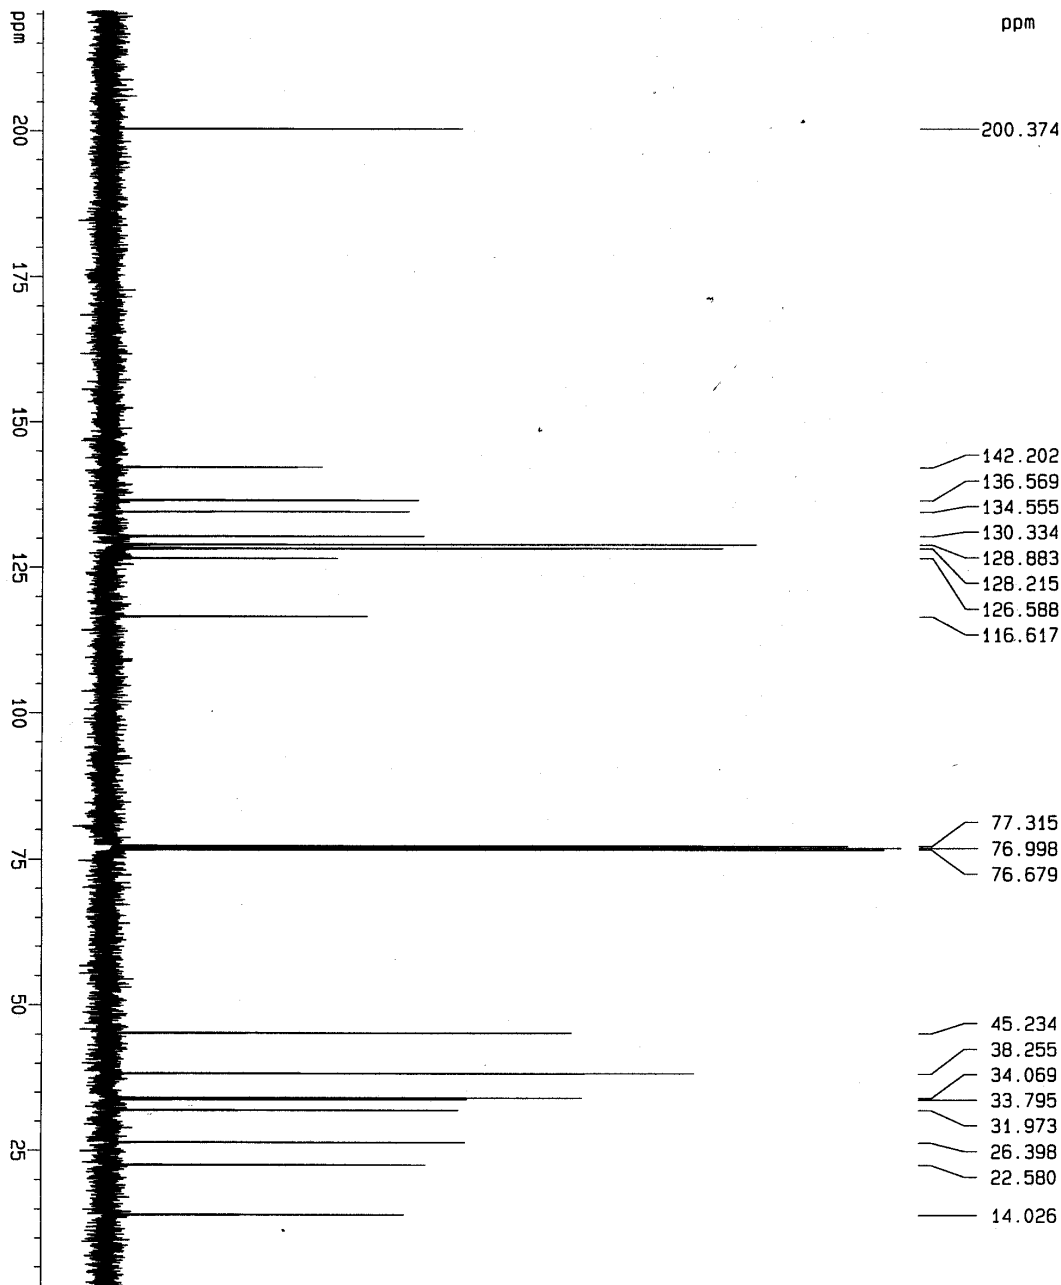

Current Data Parameters  
 NAME JS3-279Acol  
 EXPNO 11  
 PROCNO 1

F2 - Acquisition Parameters  
 Date\_ 20060530  
 Time 15.22  
 INSTRUM spect  
 PROBRD 4H/13C  
 PULPROG zgpg30  
 TD 65536  
 SOLVENT CDCl3  
 NS 113  
 DS 2  
 SMH 26246.719 Hz  
 FIDRES 0.400493 Hz  
 AQ 1.2485298 sec  
 RG 2048  
 DM 19.050 usec  
 DE 6.00 usec  
 TE 300.0 K  
 D1 0.80000001 sec  
 d11 0.03000000 sec  
 d12 0.0002000 sec

===== CHANNEL f1 =====  
 NUC1 13C  
 P1 6.00 usec  
 PL1 0.00 dB  
 SF01 100.6036782 MHz

===== CHANNEL f2 =====  
 CDPORG2 waltz16  
 NUC2 1H  
 PCPD2 80.00 usec  
 PL2 -6.00 dB  
 PL12 13.80 dB  
 PL13 14.50 dB  
 SF02 400.0516002 MHz

F2 - Processing parameters  
 SI 32768  
 SF 100.5826597 MHz  
 NDM EM  
 SSB 0  
 LB 1.00 Hz  
 GB 0  
 PC 1.40

1D NMR plot parameters  
 CX 20.00 cm  
 CY 12.50 cm  
 F1P 220.529 ppm  
 F1 22183.63 Hz  
 F2P 1.615 ppm  
 F2 162.48 Hz  
 PPMCH 10.94570 ppm/cm  
 HZCM 1101.05676 Hz/cm





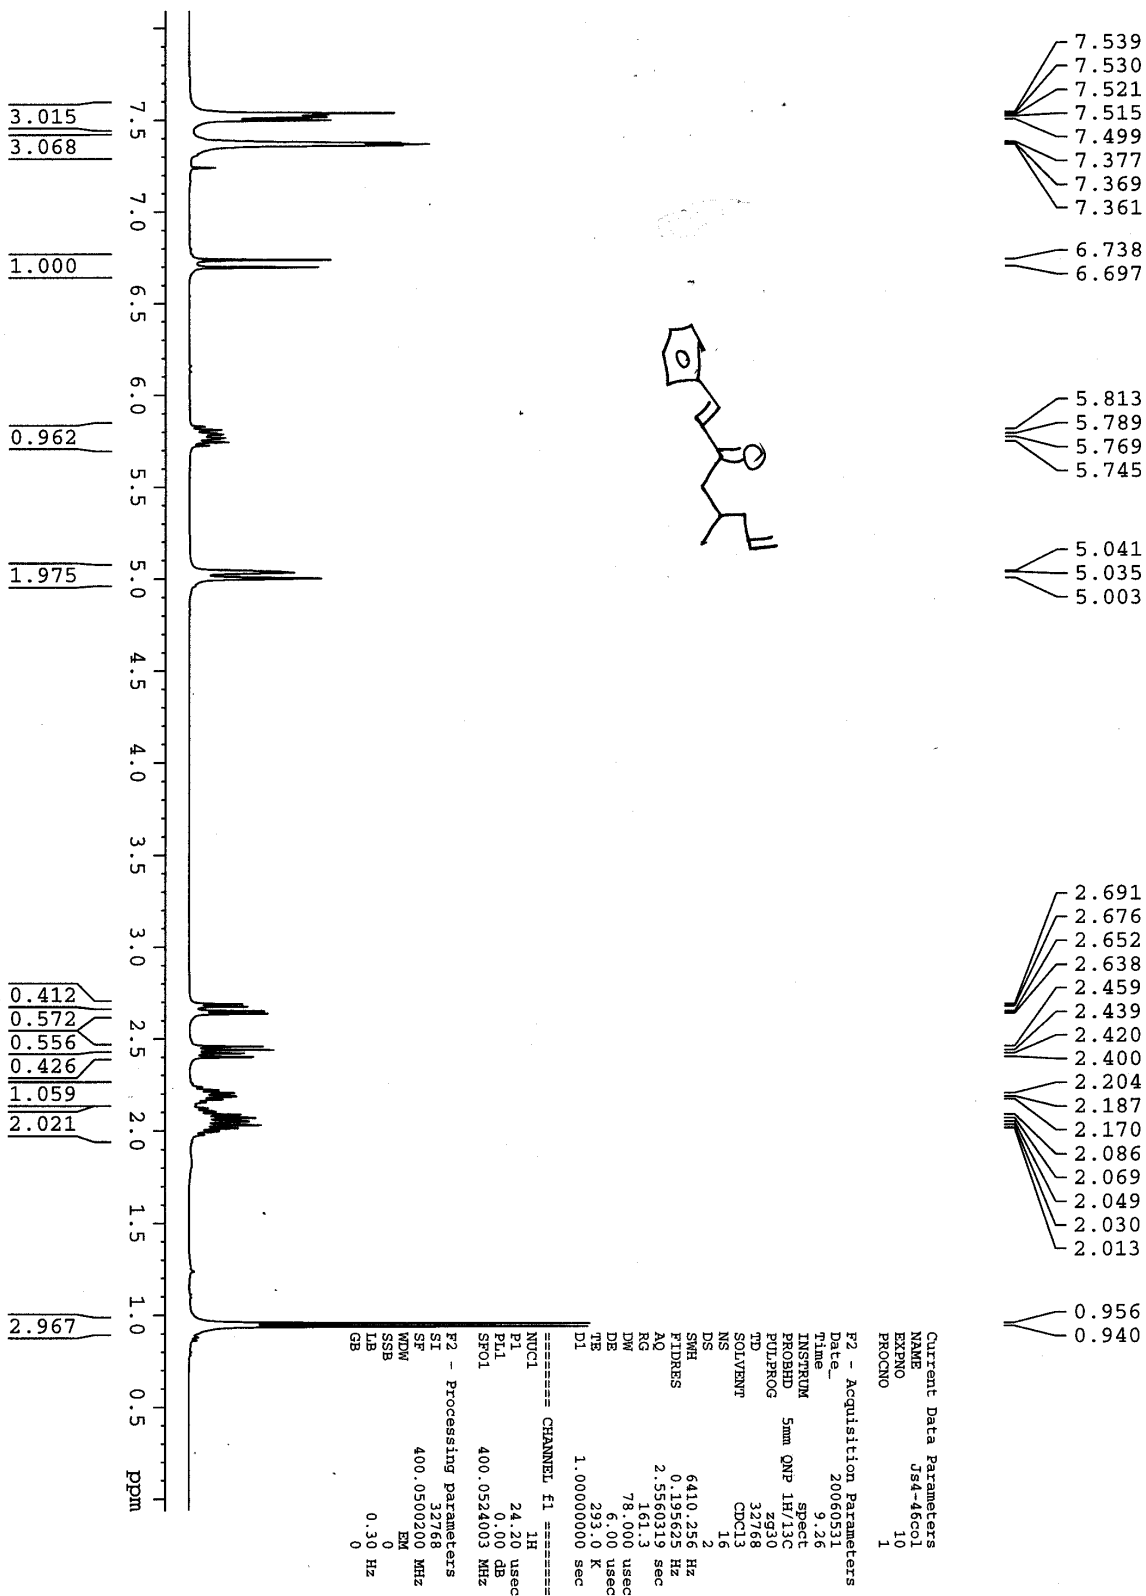

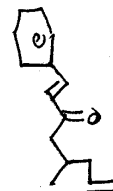

Js4-46 column

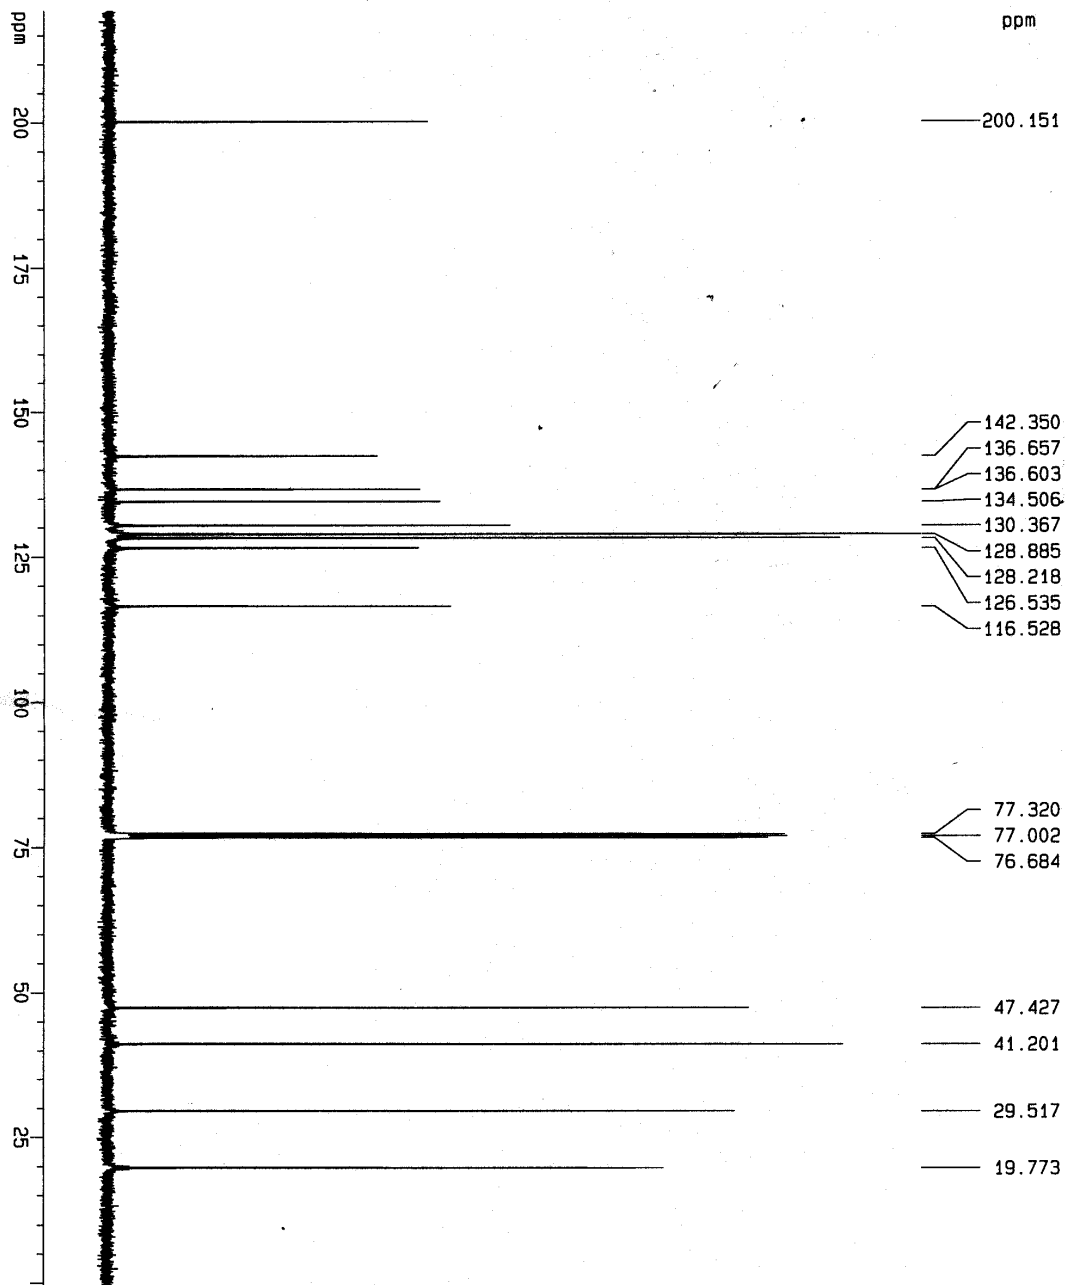

Current Data Parameters  
 NAME Js4-46c01  
 EXPNO 11  
 PROCNO 1

F2 - Acquisition Parameters  
 Date\_ 20060531  
 Time 9.58  
 INSTRUM spect  
 PROCNO 5mm QNP 1H/13C  
 PULPROG zgpg30  
 TD 65536  
 SOLVENT CDCl3  
 NS 910  
 DS 2  
 SWH 26246.719 Hz  
 FIDRES 0.400483 Hz  
 AQ 1.2485298 sec  
 RG 2298.8  
 DW 19.050 usec  
 DE 6.00 usec  
 TE 300.0 K  
 D1 0.80000001 sec  
 d11 0.03000000 sec  
 d12 0.00002000 sec

===== CHANNEL f1 =====  
 NUC1 13C  
 P1 6.00 usec  
 PL1 0.00 dB  
 SFO1 100.6036782 MHz

===== CHANNEL f2 =====  
 CPDPRG2 waltz16  
 NUC2 1H  
 PCD2 80.00 usec  
 PL2 -6.00 dB  
 PL12 13.80 dB  
 PL13 14.50 dB  
 SFO2 400.0516002 MHz

F2 - Processing parameters  
 SI 32768  
 SF 100.5926005 MHz  
 WDW EM  
 SSB 0  
 LB 1.00 Hz  
 GB 0  
 PC 1.40

1D NMR plot parameters  
 CX 20.00 cm  
 CY 12.50 cm  
 F1p 219.155 ppm  
 F1 22045.41 Hz  
 F2p -0.783 ppm  
 F2 -78.79 Hz  
 PPRCM 10.98982 ppm/cm  
 HZCM 1106.20984 Hz/cm

JS3-282 column

|       |
|-------|
| 7.241 |
| 7.175 |
| 7.156 |
| 6.739 |
| 6.699 |
| 6.674 |
| 6.657 |
| 6.634 |
| 6.617 |
| 5.952 |
| 5.912 |
| 5.795 |
| 5.776 |
| 5.769 |
| 5.751 |
| 5.734 |
| 5.727 |
| 5.718 |
| 5.709 |
| 5.692 |
| 5.622 |
| 5.016 |
| 4.997 |
| 4.973 |
| 4.939 |
| 4.913 |
| 3.299 |
| 3.281 |
| 3.263 |
| 2.831 |
| 2.817 |
| 2.812 |
| 2.642 |
| 2.627 |
| 2.602 |
| 2.587 |
| 2.549 |
| 2.532 |
| 2.509 |
| 2.492 |
| 2.390 |
| 2.372 |
| 2.354 |
| 2.197 |
| 2.183 |
| 2.166 |
| 2.150 |
| 2.135 |
| 2.084 |
| 2.067 |
| 2.052 |
| 2.038 |
| 2.024 |
| 2.008 |
| 1.989 |
| 1.973 |
| 1.956 |
| 1.937 |
| 1.732 |
| 1.702 |
| 1.676 |
| 1.641 |
| 1.393 |
| 1.385 |

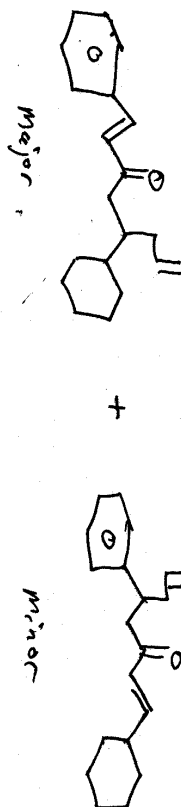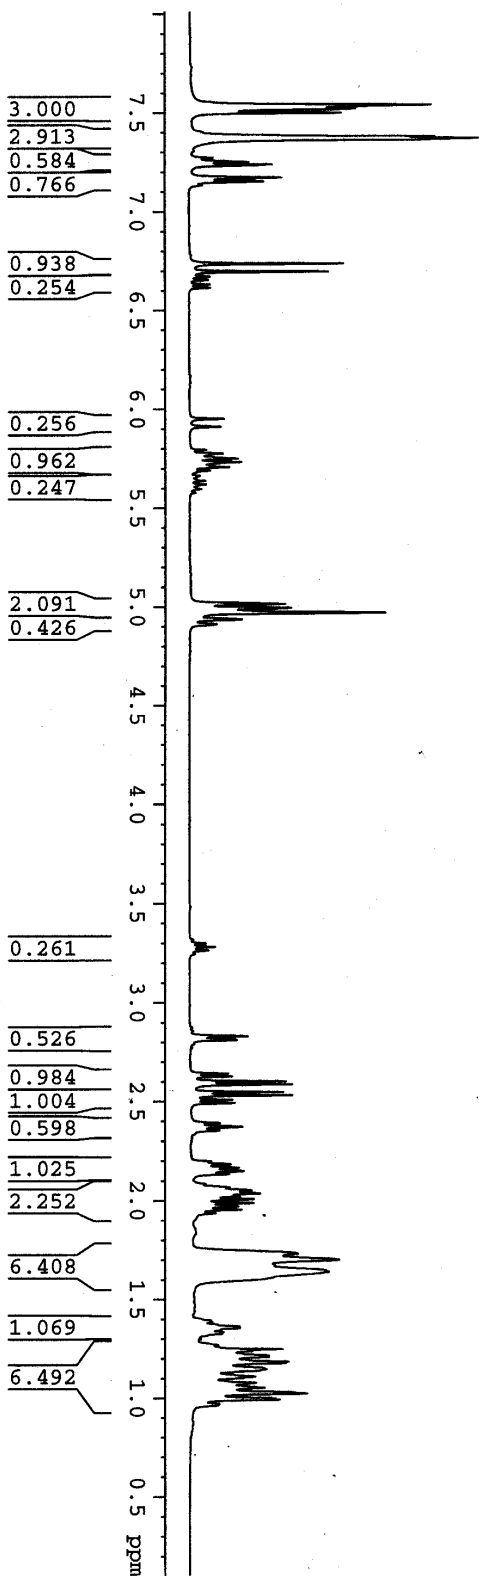

Current Data Parameters  
NAME JS3-282col  
EXPNO 10  
PROCNO 1  
F2 - Acquisition Parameters  
Date\_ 20050607  
Time 14:44  
INSTRUM spect  
PROBHD 5mm QNP 1H/13C  
PULPROG zgpg30  
TD 32768  
SOLVENT CDCl3  
NS 16  
DS 4  
SWH 6410.256 Hz  
FIDRES 0.195625 Hz  
AQ 2.5559540 sec  
RG 327.680  
WV 78.000 usec  
DE 20.130  
DI 1.0000000 sec  
----- CHANNEL f1 -----  
NUC1 13C  
P1 24.20 usec  
PL1 0.00 dB  
SFO1 400.0524003 MHz  
F2 - Processing parameters  
SI 32768  
SF 400.0524003 MHz  
WDW EM  
SSB 0  
GB 0  
PC 1.00

js5-38c01-13C  
exp2 std13c

SAMPLE DEC. & VT  
Jan 9 2007 4444 400-029

| sample | date       | solvent | dfreq | dec     | vol |
|--------|------------|---------|-------|---------|-----|
| 9      | Jan 9 2007 | CDC13   | dn    | 400.029 | H1  |

| file        | exp | upw | dof |
|-------------|-----|-----|-----|
| ACQUISITION |     |     | 0   |

| strq<br>in | 100.599<br>C13 | dm<br>dmm | yy<br>w |
|------------|----------------|-----------|---------|
|            |                |           |         |

```

at      0.640  dmf      861/
nd      32876  PROCESSING

```

| SW | lb    | 2.00   |
|----|-------|--------|
| th | 14200 | wtfile |

| id | name | type | status | location | notes    |
|----|------|------|--------|----------|----------|
| 1  | bs   | 4    | proc   | ft       | not used |
| 2  | bs   | 4    | proc   | ft       | not used |
| 3  | bs   | 4    | proc   | ft       | not used |
| 4  | bs   | 4    | proc   | ft       | not used |
| 5  | bs   | 4    | proc   | ft       | not used |
| 6  | bs   | 4    | proc   | ft       | not used |
| 7  | bs   | 4    | proc   | ft       | not used |
| 8  | bs   | 4    | proc   | ft       | not used |
| 9  | bs   | 4    | proc   | ft       | not used |
| 10 | bs   | 4    | proc   | ft       | not used |
| 11 | bs   | 4    | proc   | ft       | not used |
| 12 | bs   | 4    | proc   | ft       | not used |
| 13 | bs   | 4    | proc   | ft       | not used |
| 14 | bs   | 4    | proc   | ft       | not used |
| 15 | bs   | 4    | proc   | ft       | not used |
| 16 | bs   | 4    | proc   | ft       | not used |
| 17 | bs   | 4    | proc   | ft       | not used |
| 18 | bs   | 4    | proc   | ft       | not used |
| 19 | bs   | 4    | proc   | ft       | not used |
| 20 | bs   | 4    | proc   | ft       | not used |
| 21 | bs   | 4    | proc   | ft       | not used |
| 22 | bs   | 4    | proc   | ft       | not used |
| 23 | bs   | 4    | proc   | ft       | not used |
| 24 | bs   | 4    | proc   | ft       | not used |
| 25 | bs   | 4    | proc   | ft       | not used |
| 26 | bs   | 4    | proc   | ft       | not used |
| 27 | bs   | 4    | proc   | ft       | not used |
| 28 | bs   | 4    | proc   | ft       | not used |
| 29 | bs   | 4    | proc   | ft       | not used |
| 30 | bs   | 4    | proc   | ft       | not used |
| 31 | bs   | 4    | proc   | ft       | not used |
| 32 | bs   | 4    | proc   | ft       | not used |
| 33 | bs   | 4    | proc   | ft       | not used |
| 34 | bs   | 4    | proc   | ft       | not used |
| 35 | bs   | 4    | proc   | ft       | not used |
| 36 | bs   | 4    | proc   | ft       | not used |
| 37 | bs   | 4    | proc   | ft       | not used |
| 38 | bs   | 4    | proc   | ft       | not used |
| 39 | bs   | 4    | proc   | ft       | not used |
| 40 | bs   | 4    | proc   | ft       | not used |
| 41 | bs   | 4    | proc   | ft       | not used |
| 42 | bs   | 4    | proc   | ft       | not used |
| 43 | bs   | 4    | proc   | ft       | not used |
| 44 | bs   | 4    | proc   | ft       | not used |
| 45 | bs   | 4    | proc   | ft       | not used |
| 46 | bs   | 4    | proc   | ft       | not used |
| 47 | bs   | 4    | proc   | ft       | not used |
| 48 | bs   | 4    | proc   | ft       | not used |
| 49 | bs   | 4    | proc   | ft       | not used |
| 50 | bs   | 4    | proc   | ft       | not used |
| 51 | bs   | 4    | proc   | ft       | not used |
| 52 | bs   | 4    | proc   | ft       | not used |
| 53 | bs   | 4    | proc   | ft       | not used |
| 54 | bs   | 4    | proc   | ft       | not used |
| 55 | bs   | 4    | proc   | ft       | not used |
| 56 | bs   | 4    | proc   | ft       | not used |
| 57 | bs   | 4    | proc   | ft       | not used |
| 58 | bs   | 4    | proc   | ft       | not used |
| 59 | bs   | 4    | proc   | ft       | not used |
| 60 | bs   | 4    | proc   | ft       | not used |
| 61 | bs   | 4    | proc   | ft       | not used |
| 62 | bs   | 4    | proc   | ft       | not used |
| 63 | bs   | 4    | proc   | ft       | not used |
| 64 | bs   | 4    | proc   | ft       | not used |
| 65 | bs   | 4    | proc   | ft       | not used |
| 66 | bs   | 4    | proc   | ft       | not used |
| 67 | bs   | 4    | proc   | ft       | not used |
| 68 | bs   | 4    | proc   | ft       | not used |
| 69 | bs   | 4    | proc   | ft       | not used |
| 70 | bs   | 4    | proc   | ft       | not used |
| 71 | bs   | 4    | proc   | ft       | not used |
| 72 | bs   | 4    | proc   | ft       | not used |
| 73 | bs   | 4    | proc   | ft       | not used |
| 74 | bs   | 4    | proc   | ft       | not used |
| 75 | bs   | 4    | proc   | ft       | not used |
| 76 | bs   | 4    | proc   | ft       | not used |
| 77 | bs   | 4    | proc   | ft       | not used |
| 78 | bs   | 4    | proc   | ft       | not used |
| 79 | bs   | 4    | proc   | ft       | not used |
| 80 |      |      |        |          |          |

| CPWT | III | 100 |
|------|-----|-----|
| PW   | 8.7 |     |

|     |        |      |
|-----|--------|------|
| d1  | 4.000  | werr |
| tof | 2271.7 | wexp |

|    |       |     |
|----|-------|-----|
| nt | 40000 | wbs |
| ct | 308   | wnt |

| lock     | n |
|----------|---|
| not used |   |

**FLAGS**

30

dp      y

DISPLAY

|    |         |
|----|---------|
| sp | -138.5  |
| wp | 21228.2 |

159  
vs  
ec

[illegible]

|           |        |
|-----------|--------|
| 11/2/2011 | 04:31  |
| 11/2/2011 | 500.00 |
| 11/2/2011 | 00.00  |

|     |        |
|-----|--------|
| rfl | 8828.2 |
| rfp | 7745.2 |

th 3  
ms 100.000

nm on ph

09

0.40

200

2

.48

199

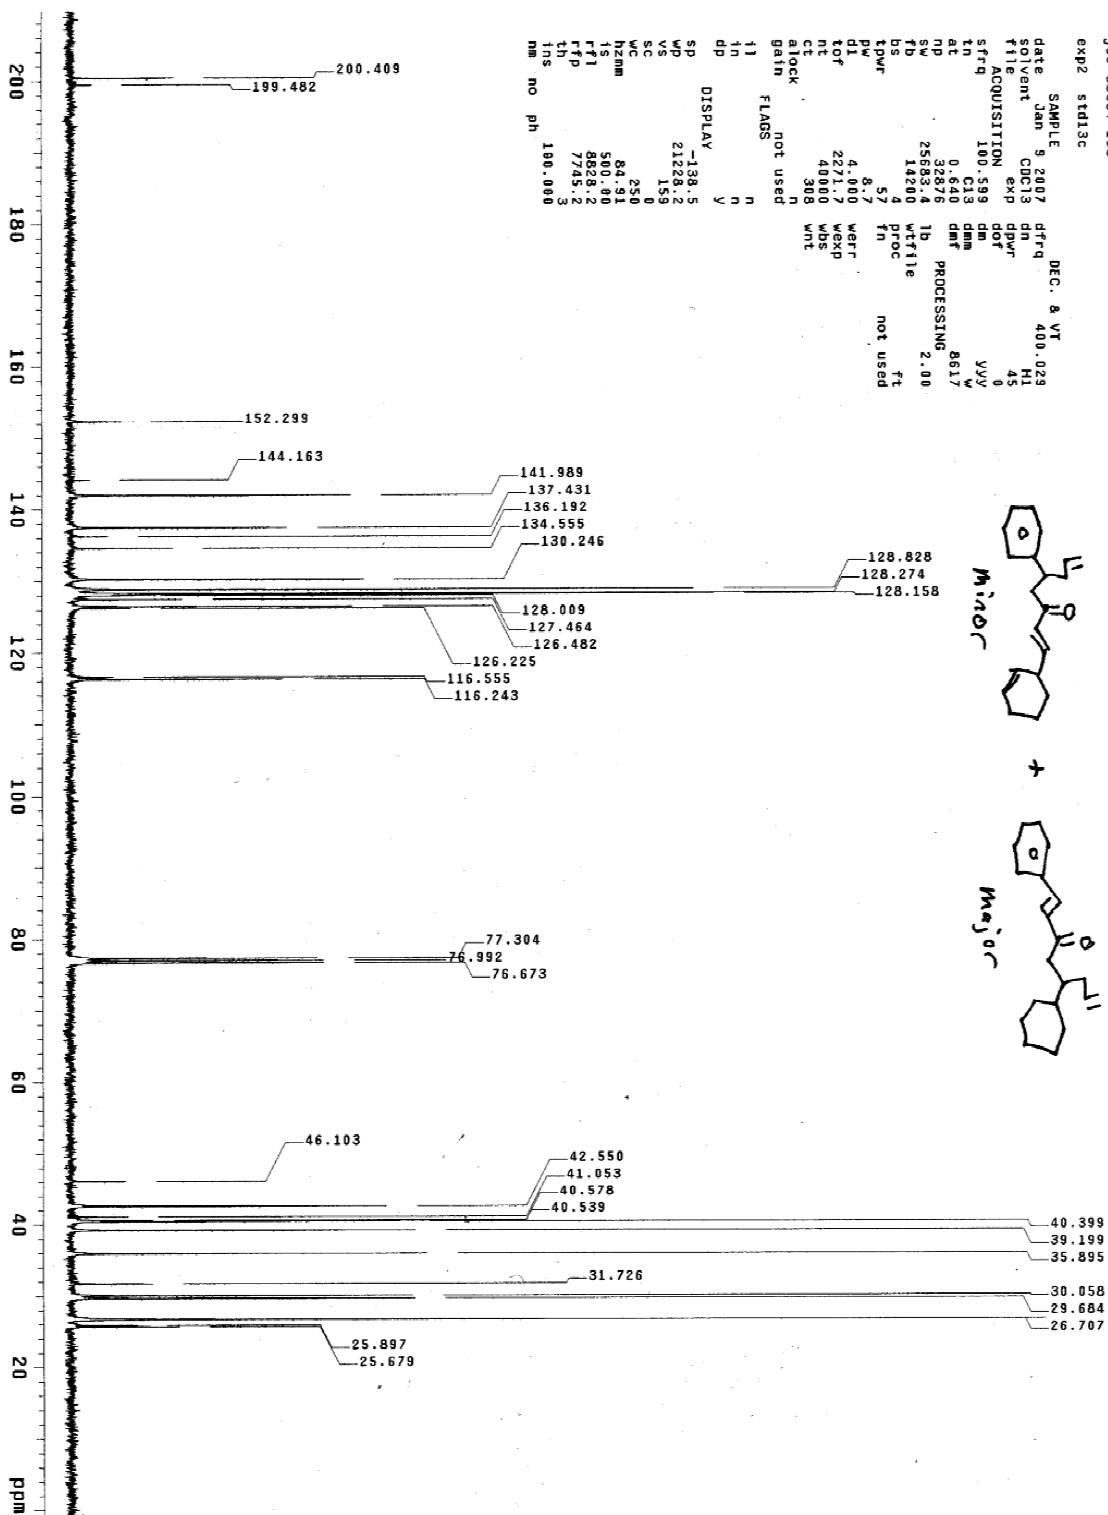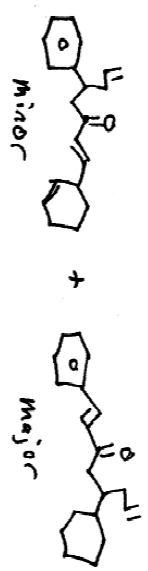

Js4-8 column

7.540  
7.531  
7.521  
7.517  
7.500  
7.374  
7.365  
7.359  
7.241  
6.747  
6.706

5.748  
5.735  
5.730  
5.726  
5.717  
5.712  
5.706  
5.693  
4.994  
4.951  
4.925  
4.899

2.689  
2.676  
2.646  
2.634  
2.493  
2.478  
2.450  
2.435  
2.397  
2.392  
2.388  
2.384  
2.380  
2.366  
2.357  
2.353  
2.345  
2.150  
2.140  
2.127  
2.116  
1.822  
1.798  
1.788  
1.774  
1.764  
1.740  
1.000  
0.894  
0.810

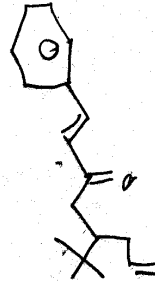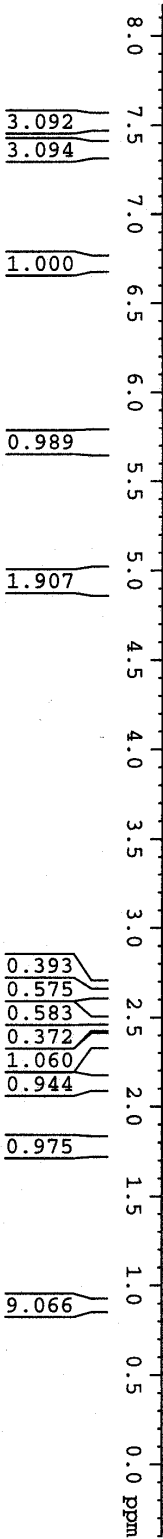

Current Data Parameters  
NAME Js4-8col  
EXPNO 10  
PROCNO 1  
F2 - Acquisition Parameters  
Date\_ 20060531  
Time 10.07  
INSTRUM spect  
PROBHD 5mm QNP 1H/13C  
PULPROG zg30  
TD 32768  
SOLVENT CDCl3  
NS 16  
DS 2  
SWH 6410.256 Hz  
FIDRES 0.195625 Hz  
AQ 2.5560319 sec  
RG 181  
DW 78.000 usec  
DE 6.00 usec  
TE 293.0 K  
D1 1.00000000 sec  
===== CHANNEL f1 =====  
NUC1 1H  
P1 24.20 usec  
PL1 0.00 dB  
SFO1 400.0524003 MHz  
F2 - Processing parameters  
SI 32768  
SF 400.0500200 MHz  
WDW EM  
SSB 0  
LB 0.30 Hz  
GB 0

Js4-8 column

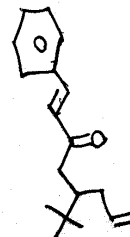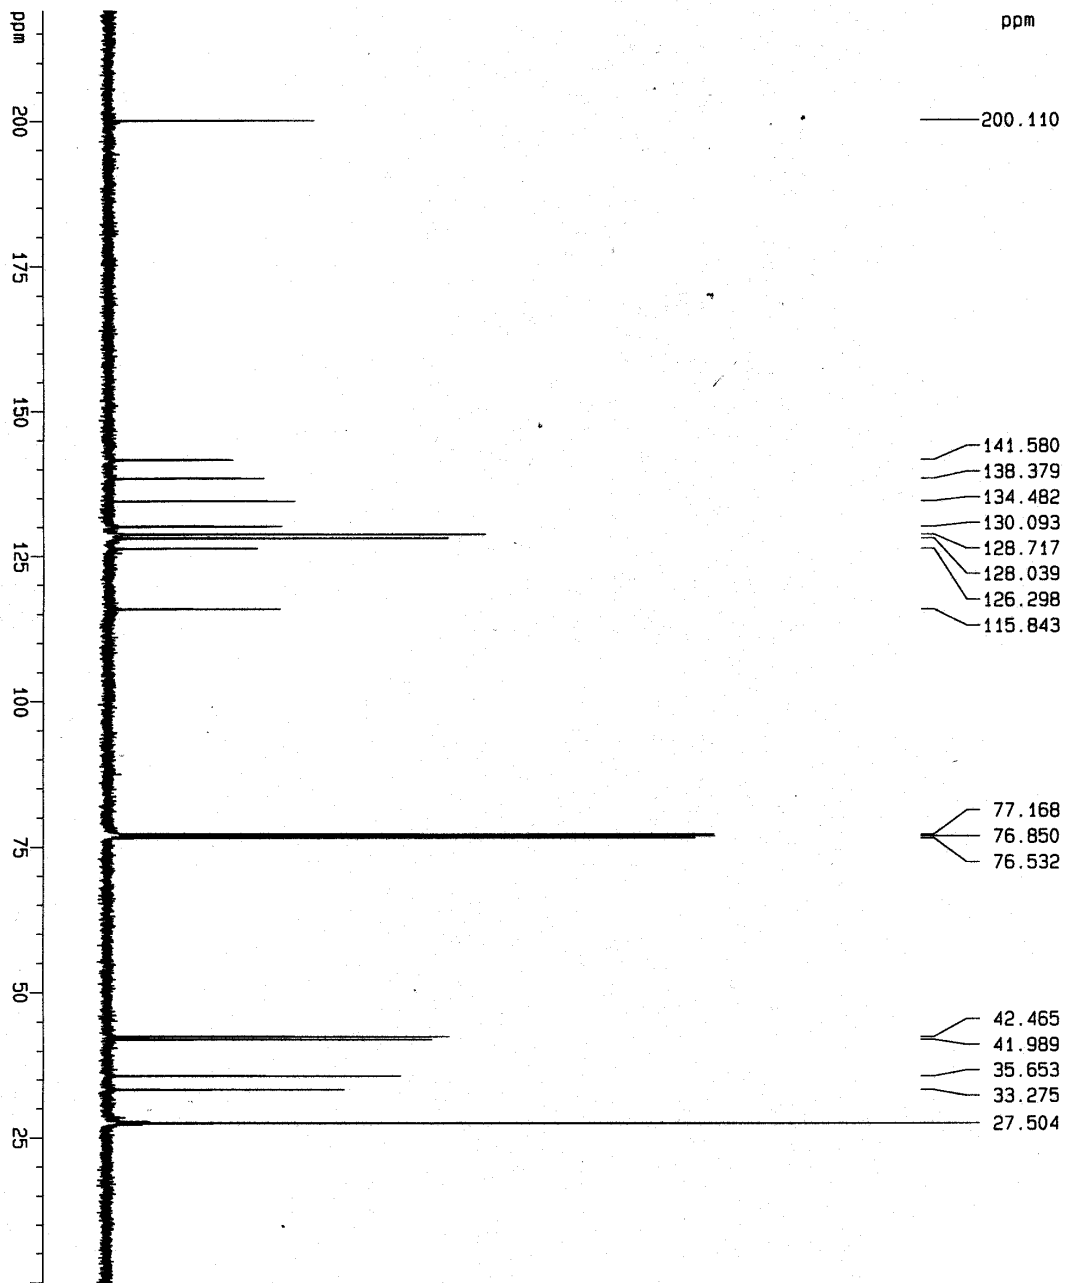

Current Data Parameters  
 NAME Js4-8c01  
 EXPNO 11  
 PROCNO 1

F2 - Acquisition Parameters  
 Date\_ 20060531  
 Time 10.24  
 INSTRUM spect  
 PROBRD 5mm QNP 1H/13C  
 PULPROG zgpg30  
 TD 65536  
 SOLVENT CDCl3  
 NS 462  
 DS 2  
 SMH 26246.719 Hz  
 FIDRES 0.400433 Hz  
 AQ 1.2485298 sec  
 RG 3251  
 DW 19.050 usec  
 DE 6.00 usec  
 TE 300.0 K  
 D1 0.80000001 sec  
 d11 0.03000000 sec  
 d12 0.00002000 sec

===== CHANNEL f1 =====  
 NUC1 13C  
 P1 6.00 usec  
 PL1 0.00 dB  
 SF01 100.6036782 MHz

===== CHANNEL f2 =====  
 CPDPRG2 waltz16  
 NUC2 1H  
 PCPD2 80.00 usec  
 PL2 -6.00 dB  
 PL12 13.80 dB  
 PL13 14.50 dB  
 SF02 400.0516002 MHz

F2 - Processing parameters  
 SI 32768  
 SF 100.5926741 MHz  
 MDW EM  
 SSB 0  
 LB 1.00 Hz  
 GB 0  
 PC 1.40

1D NMR plot parameters  
 CX 20.00 cm  
 CY 12.50 cm  
 F1P 219.020 ppm  
 F1 22031.79 Hz  
 F2P -0.577 ppm  
 F2 -58.06 Hz  
 PRPCH 10.97965 ppm/cm  
 HZCH 1104.49219 Hz/cm

Js4-48 column, major regioisomer

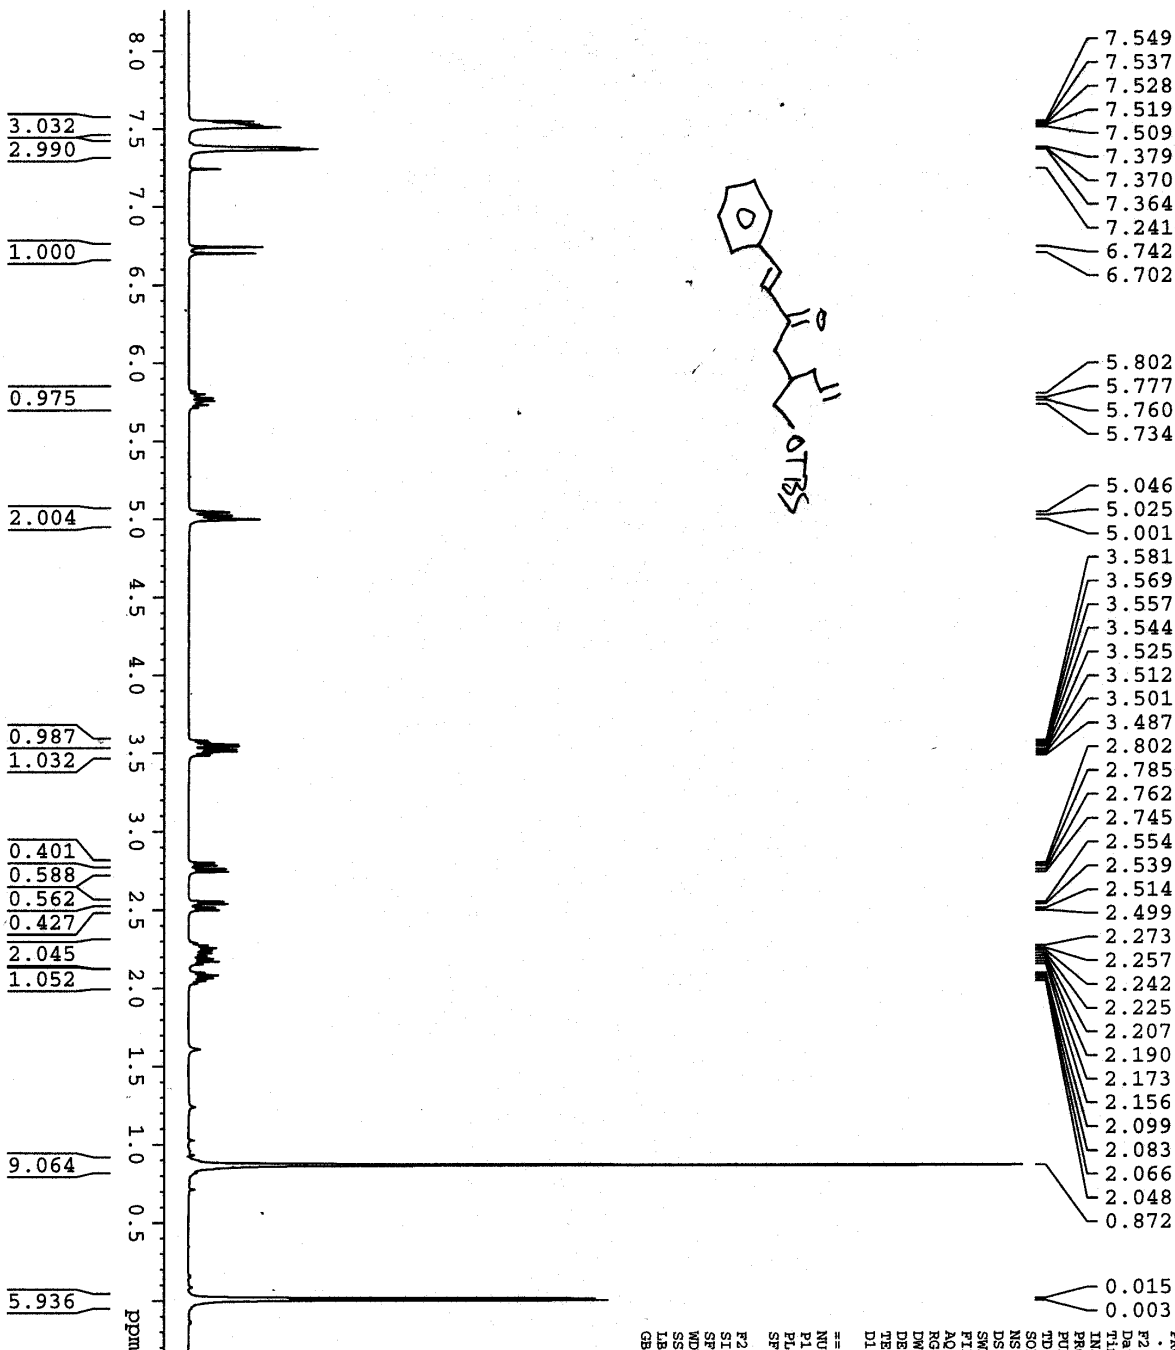

Current Data Parameters  
NAME Js4-48col  
EXPNO 1  
PROCNO 1  
F2 - Acquisition Parameters  
Date\_ 20060530  
Time 15:29  
INSTRUM spect  
PROBHD 5mm QNP 1H/13C  
PULPROG zgpg30  
TD 32768  
SOLVENT CDCl3  
NS 16  
DS 2  
SWH 6410.256 Hz  
FIDRES 0.195625 Hz  
AQ 2.5560319 sec  
RG 203.2  
DW 78.000 usec  
DE 6.00 usec  
TE 293.0 K  
D1 1.00000000 sec  
===== CHANNEL f1 =====  
NUC1 1H  
P1 24.20 usec  
PL1 0.00 dB  
SFO1 400.0524003 MHz  
F2 - Processing parameters  
SI 13768  
SF 400.0500200 MHz  
WDW EM  
SSB 0  
LB 0.30 Hz  
GB 0

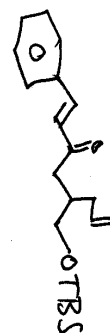

JS4-48 column, major regioisomer

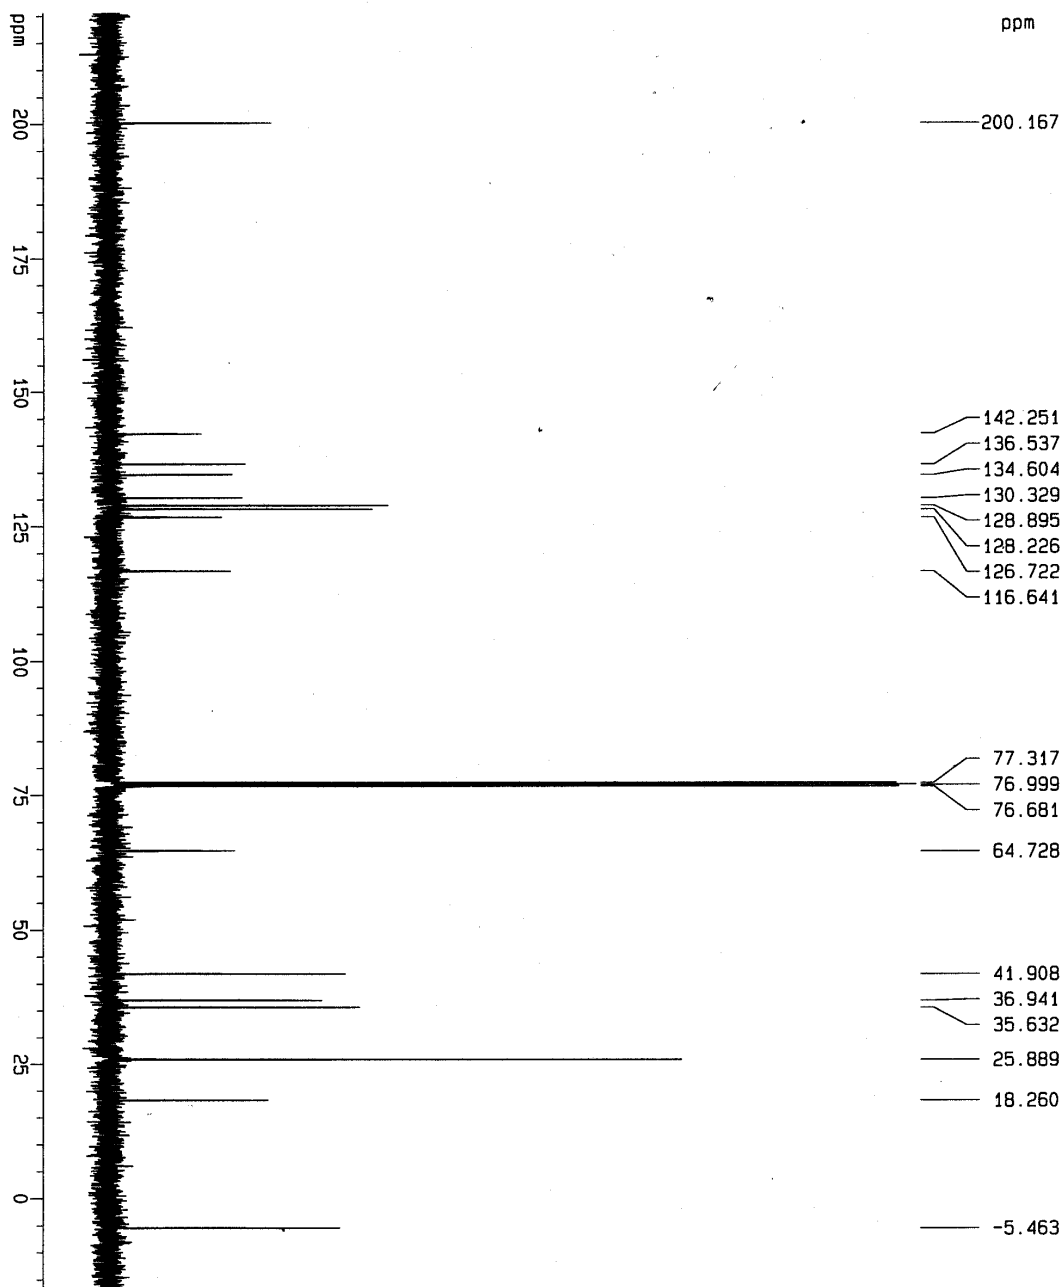

Current Data Parameters  
 NAME JS4-48col  
 EXPNO 11  
 PROCNO 1

F2 - Acquisition Parameters  
 Date\_ 20060530  
 Time 15.33  
 INSTRUM spect  
 PROCNO 5mm DNP 1H/13C  
 PULPROG zgpg30  
 TD 65536  
 SOLVENT CDCl3  
 NS 121  
 DS 2  
 SWH 26246.719 Hz  
 FIDRES 0.400493 Hz  
 AQ 1.2485298 sec  
 RG 3251  
 DM 19.050 usec  
 DE 6.00 usec  
 TE 300.0 K  
 D1 0.80000001 sec  
 d11 0.03000000 sec  
 d12 0.0002000 sec

===== CHANNEL f1 =====  
 NUC1 13C  
 P1 6.00 usec  
 PL1 0.00 dB  
 SF01 100.6036782 MHz

===== CHANNEL f2 =====  
 CDPORG2 waltz16  
 NUC2 1H  
 PCPD2 80.00 usec  
 PL2 -6.00 dB  
 PL12 13.80 dB  
 PL13 14.50 dB  
 SF02 400.0516002 MHz

F2 - Processing parameters  
 SI 32768  
 SF 100.5926573 MHz  
 MDK EM  
 SSB 0  
 LB 1.00 Hz  
 GB 0  
 PC 1.40

1D NMR plot parameters  
 CX 20.00 cm  
 CY 12.50 cm  
 F1P 220.553 ppm  
 F1 22186.03 Hz  
 F2P -16.803 ppm  
 F2 -1690.24 Hz  
 PPRCM 11.86780 ppm/cm  
 HZCM 1193.81346 Hz/cm



Js4-48 column, minor regioisomer

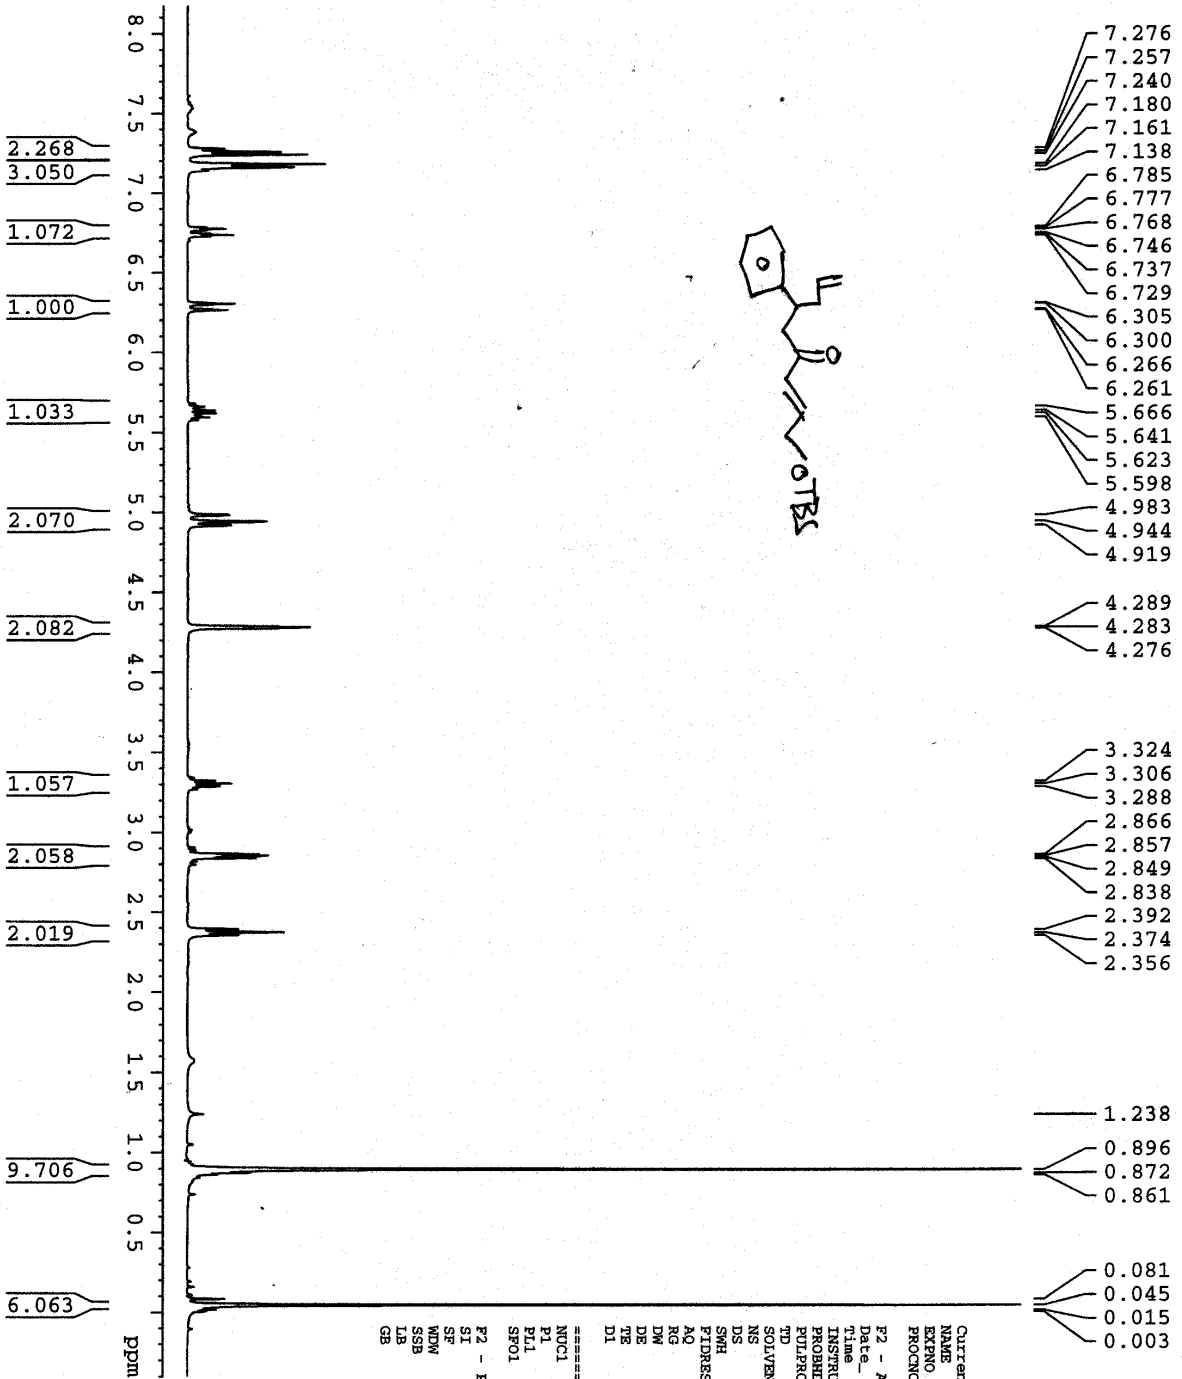

Current Data Parameters  
NAME Js4-48col  
EXPNO 2  
PROCNO 1

F2 - Acquisition Parameters  
Date\_ 20060530  
Time 15.47  
INSTRUM spect  
PROBHD 5mm QNP 1H/13C  
PULPROG zg30  
TD 32768  
SOLVENT CDCl3  
NS 16  
DS 2  
SWH 6410.256 Hz  
FIDRES 0.195625 Hz  
AQ 2.5560319 sec  
RG 322.5  
DW 78.000 usec  
DE 6.00 usec  
TE 293.0 K  
D1 1.00000000 sec

===== CHANNEL f1 =====  
NUC1 13C  
P1 24.20 usec  
PL1 0.00 dB  
SFO1 400.0524003 MHz

F2 - Processing parameters  
SI 32768  
SF 400.0500200 MHz  
WDW EM  
SSB 0  
LB 0.30 Hz  
GB 0

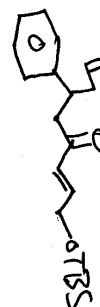

JS4-48 column, minor regioisomer

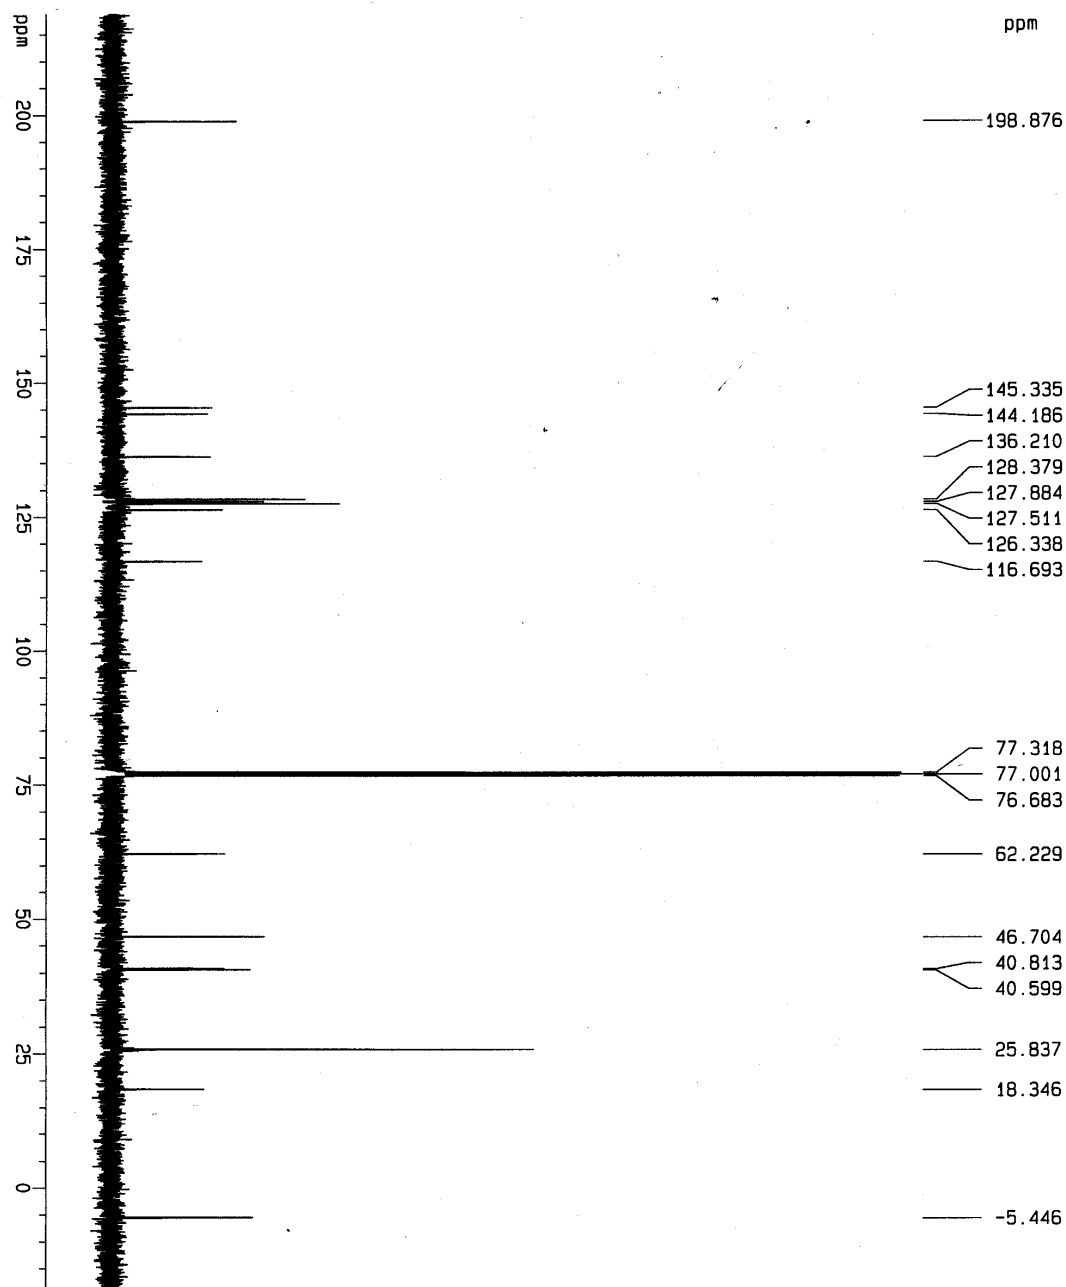

Current Data Parameters  
 NAME JS4-48c01  
 EXPNO 21  
 PROCNO 1

F2 - Acquisition Parameters  
 Date\_ 20060530  
 Time 15.55  
 INSTRUM spect  
 PROBD 5mm QNP 1H/13C  
 PULPROG zgpg30  
 TD 65536  
 SOLVENT CDCl3  
 NS 245  
 DS 2  
 SH 26246.719 Hz  
 FIDRES 0.400493 Hz  
 AQ 1.2485298 sec  
 RG 3649.1  
 DW 19.050 usec  
 DE 6.00 usec  
 TE 300.0 K  
 D1 0.80000001 sec  
 d11 0.03000000 sec  
 d12 0.00020000 sec

===== CHANNEL f1 =====  
 NUC1 13C  
 P1 6.00 usec  
 PL1 0.00 dB  
 SFO1 100.6036782 MHz

===== CHANNEL f2 =====  
 CPDPRG2 waltz16  
 NUC2 1H  
 PCPD2 80.00 usec  
 PL2 -6.00 dB  
 PL12 13.80 dB  
 PL13 14.50 dB  
 SFO2 400.0516002 MHz

F2 - Processing parameters  
 SI 32768  
 SF 100.5926565 MHz  
 MDW EM  
 SSB 0  
 LB 1.00 Hz  
 GB 0  
 PC 1.40

1D NMR plot parameters  
 CX 20.00 cm  
 CY 12.50 cm  
 F1P 218.854 ppm  
 F1 22015.07 Hz  
 F2P -18.844 ppm  
 F2 -1895.56 Hz  
 PPMCM 11.86468 ppm/cm  
 HZCM 1195.53125 Hz/cm

Js4-16 column, major regioisomer

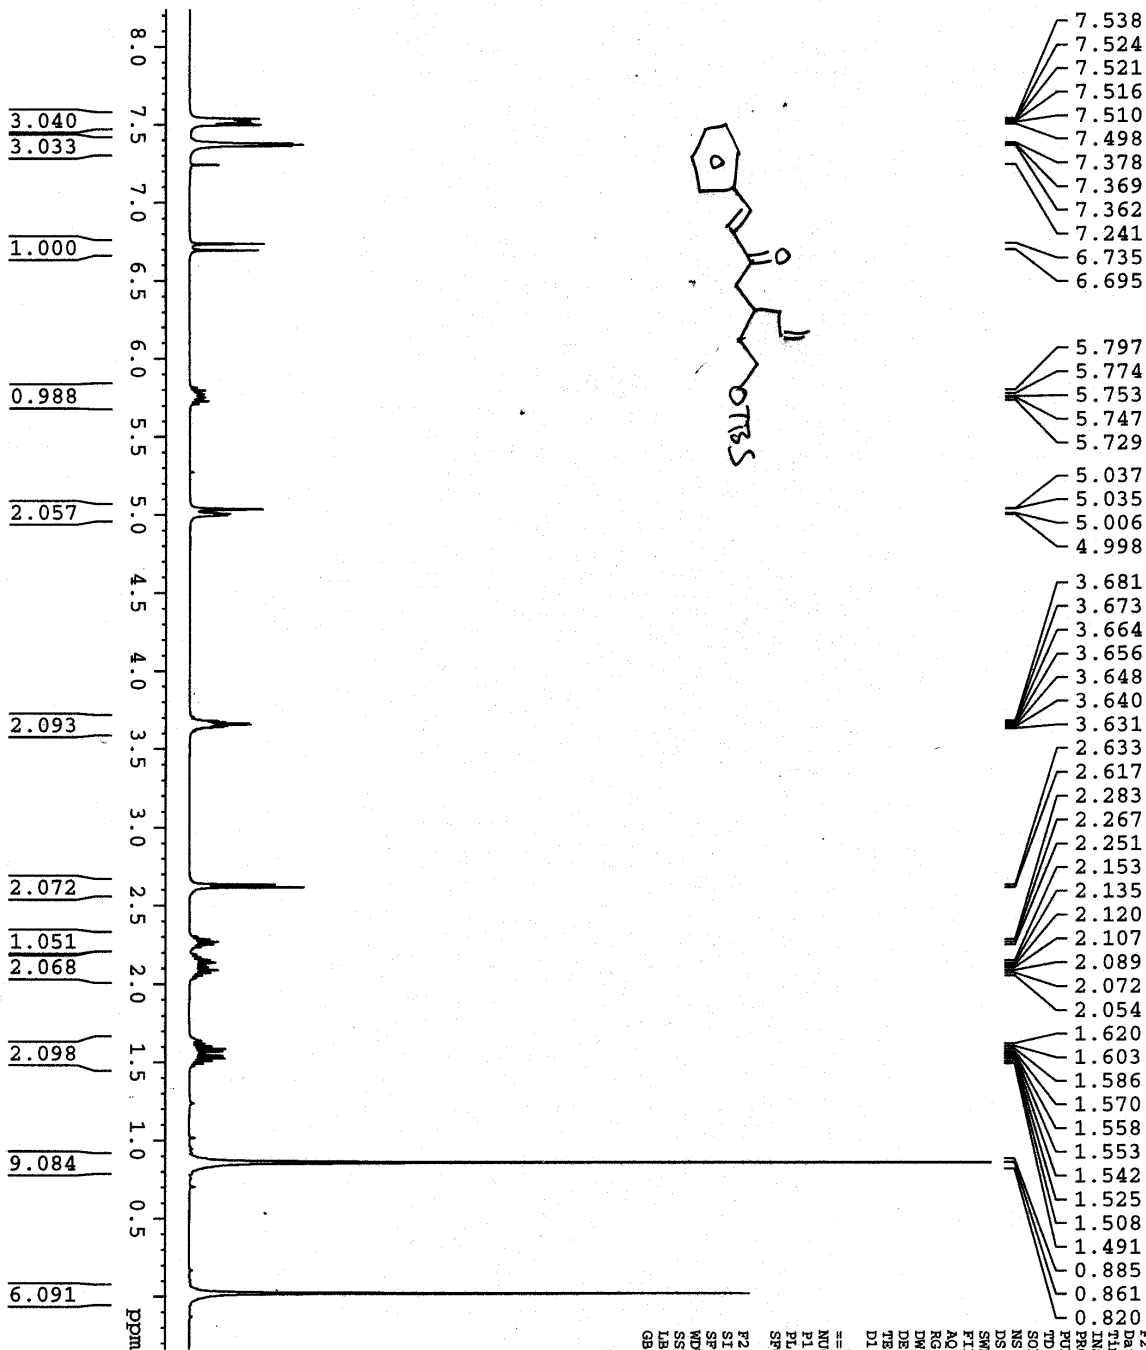

Current Data Parameters  
 NAME Js4-16col  
 EXPNO 10  
 PROCNO 1  
 F2 - Acquisition Parameters  
 Date\_ 20060602  
 Time 15:51  
 INSPRO 5mm QNP 1H/13C  
 PULPROG zgpg30  
 TD 32768  
 SOLVENT CDCl3  
 NS 16  
 DS 2  
 SWH 6410.256 Hz  
 FIDRES 0.195625 Hz  
 AQ 2.556013 sec  
 RG 131  
 DW 78.001 usec  
 DE 6.00 usec  
 TE 293.0 K  
 D1 1.00000000 sec  
 ===== CHANNEL f1 =====  
 NUC1 1H  
 P1 24.20 usec  
 PL1 0.00 dB  
 SFO1 400.0524003 MHz  
 F2 - Processing parameters  
 SI 32768  
 SF 400.0500200 MHz  
 NMR 5M  
 NSB 0  
 LB 0.30 Hz  
 GB 0

JS4-16 column, major regioisomer

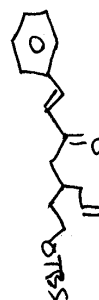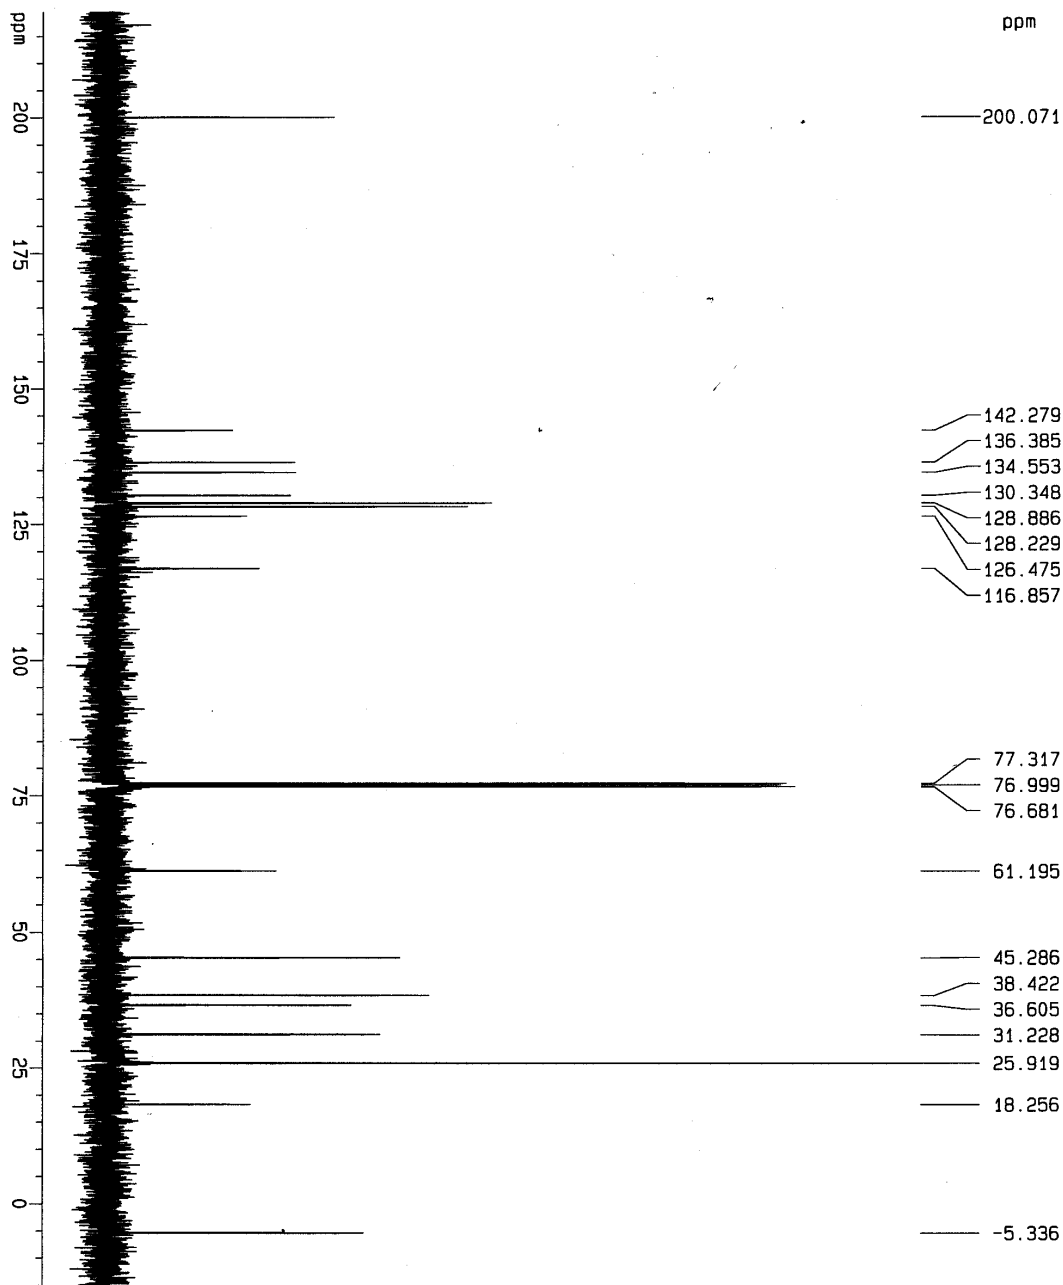

Current Data Parameters  
NAME JS4-16c01  
EXPNO 11  
PROCNO 1

F2 - Acquisition Parameters  
Date\_ 20060602  
Time 15.54  
INSTRUM spect  
PROBHD 5mm QNP 1H/13C  
PULPROG zgpg30  
TD 65536  
SOLVENT CDCl3  
NS 66  
DS 2  
SWH 26246.719 Hz  
FIDRES 0.400493 Hz  
AQ 1.2485298 sec  
RG 13004  
DM 19.050 usec  
DE 6.00 usec  
TE 300.0 K  
D1 0.80000001 sec  
d11 0.03000000 sec  
d12 0.0002000 sec

===== CHANNEL f1 =====  
NUC1 13C  
P1 6.00 usec  
PL1 0.00 dB  
SF01 100.6036782 MHz

===== CHANNEL f2 =====  
CDEPRG2 waltz16  
NUC2 1H  
PCPD2 80.00 usec  
PL2 -6.00 dB  
PL12 13.80 dB  
PL13 14.50 dB  
SF02 400.0516002 MHz

F2 - Processing parameters  
SI 32768  
SF 100.5926581 MHz  
WDW EM  
SSB 0  
LB 1.00 Hz  
GB 0  
PC 1.40

1D NMR plot parameters  
CX 20.00 cm  
CY 12.50 cm  
F1P 219.521 ppm  
F1 22082.17 Hz  
F2P -15.445 ppm  
F2 -1553.62 Hz  
P1PCMC 11.74827 ppm/cm  
HZCM 1181.78943 Hz/cm



Js4-34 column

|       |  |
|-------|--|
| 7.539 |  |
| 7.530 |  |
| 7.527 |  |
| 7.521 |  |
| 7.516 |  |
| 7.508 |  |
| 7.468 |  |
| 7.376 |  |
| 7.367 |  |
| 7.360 |  |
| 7.241 |  |
| 6.740 |  |
| 6.700 |  |
| 5.874 |  |
| 5.849 |  |
| 5.832 |  |
| 5.806 |  |
| 5.079 |  |
| 5.073 |  |
| 5.056 |  |
| 5.053 |  |
| 5.050 |  |
| 5.048 |  |
| 5.014 |  |
| 5.011 |  |
| 5.008 |  |
| 2.516 |  |
| 2.129 |  |
| 2.110 |  |
| 1.029 |  |
| 0.960 |  |

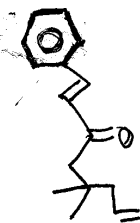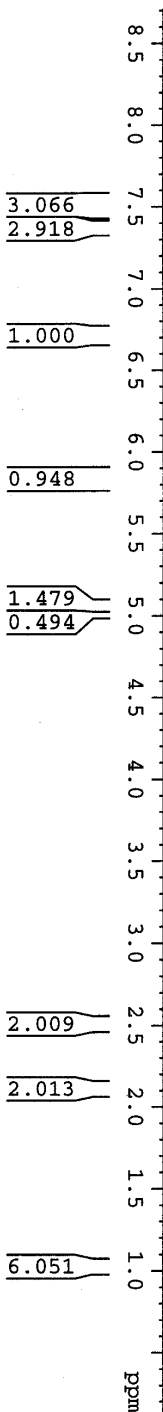

Current Data Parameters  
NAME Js4-34col  
EXPNO 10  
PROCNO 1

F2 - Acquisition Parameters  
Date\_ 20060601  
Time 16.02  
INSTRUM spect  
PROBHD 5mm QNP 1H/13C  
PULPROG zgpg30  
TD 32768  
SOLVENT CDCl3  
NS 16  
DS 2  
SWH 6410.256 Hz  
FIDRES 0.195625 Hz  
AQ 2.5560319 sec  
RG 203.2  
DW 78.000 usec  
DE 6.00 usec  
TE 293.0 K  
D1 1.00000000 sec

===== CHANNEL f1 =====  
NUC1 1H  
P1 24.20 usec  
PL1 0.00 dB  
SFO1 400.0524003 MHz

F2 - Processing parameters  
SI 32768  
SF 400.0500200 MHz  
WDW EM  
SSB 0  
LB 0.30 Hz  
GB 0

JS4-34 column

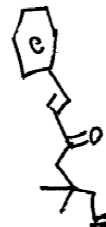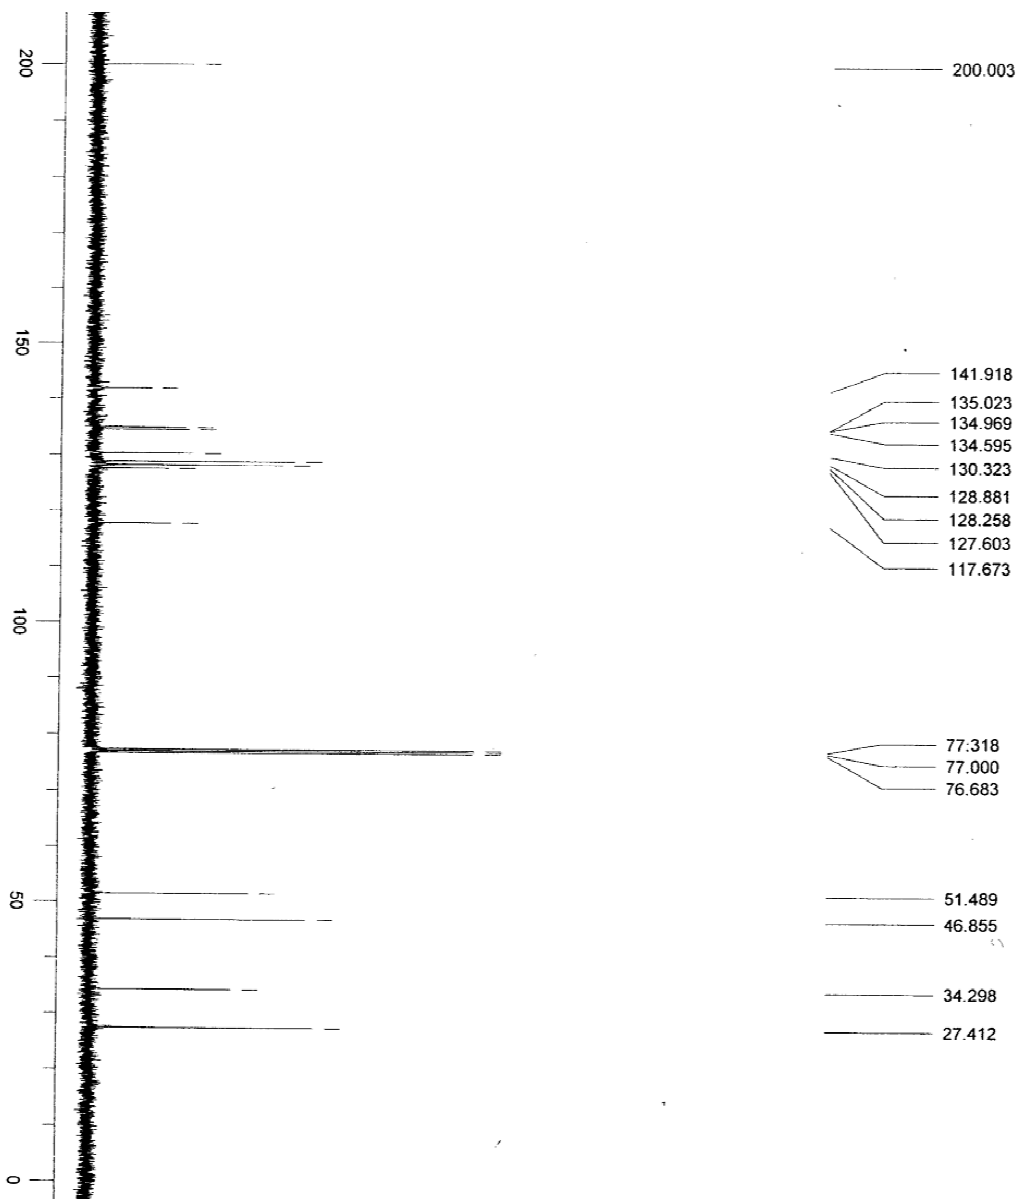

Current Data Parameters  
NAME JS4-34(01)  
EXTNO 11  
PROCNO 1

F2 - Acquisition Parameters  
Date\_ 20060601  
Time 16.05  
INSTRUM SPECT  
PROBHD SMT DWP 1H/13C  
PULPROG zgpg30  
TD 65536  
SOLVENT CDCl3  
NS 69  
DS 2  
SWH 26246.719 Hz  
FIDRES 0.400493 Hz  
AQ 1.2485298 sec  
RG 4096  
DW 19.050 usec  
DE 5.00 usec  
TE 300.2 K  
D1 0.8000001 sec  
d11 0.0300000 sec  
d12 0.0002000 sec

\*\*\*\*\* CHANNEL f1 \*\*\*\*\*  
NUC1 13C  
P1 5.00 usec  
PL1 0.00 dB  
SFO1 100.603618 MHz

\*\*\*\*\* CHANNEL f2 \*\*\*\*\*  
CPDPRG2 waltz16  
NUC2 1H  
PCPD2 1H  
BIT DO usec  
PL2 -6.00 dB  
PL12 13.80 dB  
PL13 14.50 dB  
SFO2 400.0515002 MHz

F2 - Processing Parameters  
SI 32768  
SF 100.5926599 MHz  
WDW EM  
SSB 0  
LB 1.00 Hz  
GB 0  
PC 1.40

1D NMR D1/D2 Parameters  
CX 60.00 cm  
CY 12.50 cm  
F1P 214.649 ppm  
F1 215.3170 Hz  
F2P 0.257 ppm  
F2 25.45 Hz  
PULCH 19.0856 ppm/Hz  
HZCW 1075.2908 Hz/Hz

Js4-61 column

7.599  
7.559  
7.552  
7.547  
7.543  
7.537  
7.380  
7.371  
7.365  
7.242  
6.819  
6.805  
6.779  
6.765  
5.803  
5.799  
5.783  
5.776  
5.771  
5.758  
5.754  
5.742  
5.736  
5.716  
5.042  
5.025  
5.013  
5.000

2.814  
2.798  
2.783  
2.742  
2.725  
2.708  
2.232  
2.228  
2.216  
2.207  
2.188  
2.113  
2.099  
2.083  
2.054  
2.038  
2.023  
2.006  
1.987  
1.971  
1.954  
1.947  
1.939  
1.927  
1.910  
1.898  
1.877  
1.134  
1.117  
1.065  
1.047  
0.924

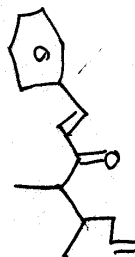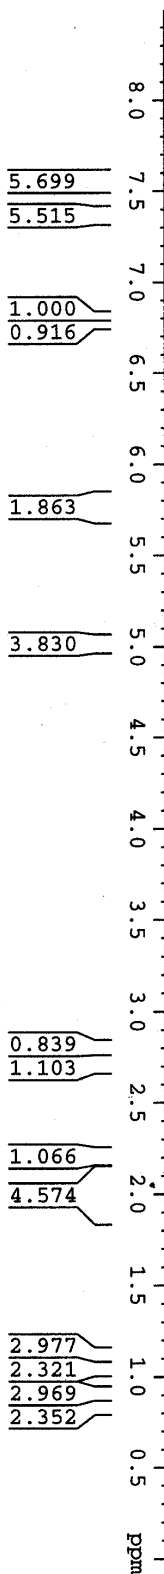

Current Data Parameters  
NAME Js4-61col  
EXRNO 10  
PROCNO 1

F2 - Acquisition Parameters  
Date\_ 20060602  
Time 17.20  
INSTRUM spect  
PROBHD 5mm QNP 1H/13C  
PULPROG zgpg30  
TD 32768  
SOLVENT CDCl3  
NS 16  
DS 2  
SWH 6410.256 Hz  
FIDRES 0.195625 Hz  
AQ 2.556319 sec  
RG 256  
RW 78.000 usec  
DE 6.00 usec  
TE 293.0 K  
D1 1.00000000 sec

===== CHANNEL f1 =====  
NUC1 1H  
P1 24.20 usec  
PL1 0.00 dB  
SFO1 400.0524003 MHz

F2 - Processing parameters  
SI 32768  
SF 400.0500200 MHz  
WDW EM  
SSB 0  
LB 0.30 Hz  
GB 0



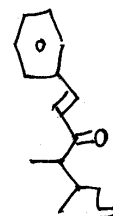

Js4-61 column

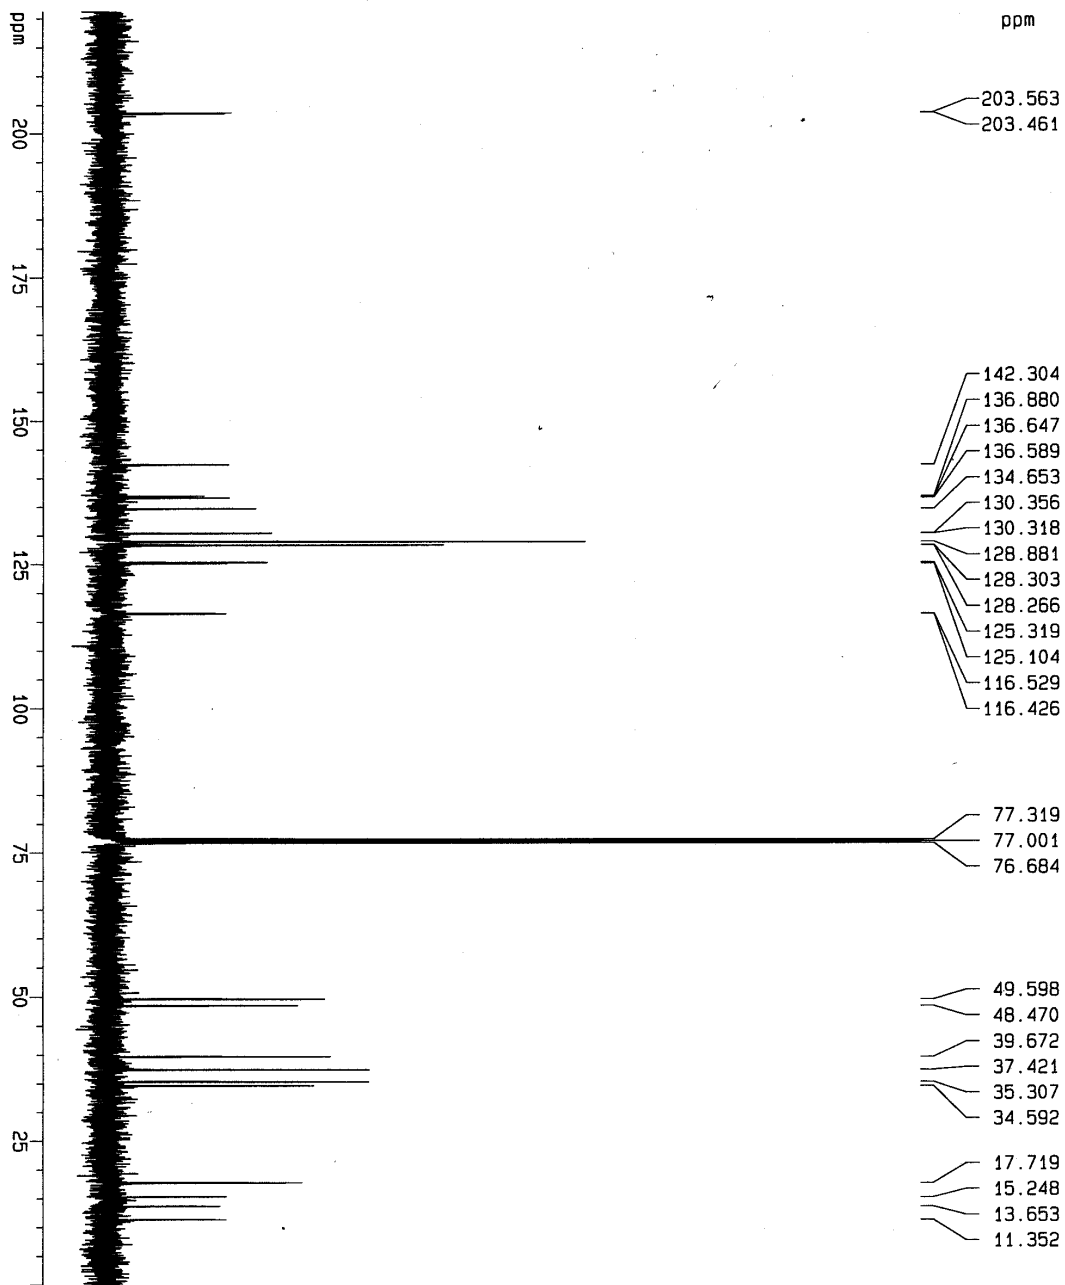

Current Data Parameters  
NAME Js4-61c01  
EXPNO 11  
PROCNO 1

F2 - Acquisition Parameters  
Date\_ 20060602  
Time 17.23  
INSTRUM spect  
PROBHD 5mm QNP 1H/13C  
PULPROG zgpg30  
TD 65536  
SOLVENT CDCl3  
NS 128  
DS 2  
SWH 26246.719 Hz  
FIDRES 0.400493 Hz  
AQ 1.2485298 sec  
RG 3649.1  
DE 19.050 usec  
TE 300.0 K  
D1 0.80000001 sec  
d11 0.03000000 sec  
d12 0.00002000 sec

===== CHANNEL f1 =====  
NUC1 13C  
P1 6.00 usec  
PL1 0.00 dB  
SFO1 100.6036782 MHz

===== CHANNEL f2 =====  
CPOPRG2 waltz16  
NUC2 1H  
PCPD2 80.00 usec  
PL2 -6.00 dB  
PL12 13.80 dB  
PL13 14.50 dB  
SFO2 400.0516002 MHz

F2 - Processing parameters  
SI 32768  
SF 100.5925981 MHz  
WDW EM  
SSB 0  
LB 1.00 Hz  
GB 0  
PC 1.40

1D NMR plot parameters  
CX 20.00 cm  
CY 18.00 cm  
F1p 221.228 ppm  
F1 22253.94 Hz  
F2p -0.418 ppm  
F2 -42.03 Hz  
PRNCH 11.08230 ppm/cm  
HZCM 1114.79534 Hz/cm

js4-179c01

expt std1h

SAMPLE DEC. 8 VT 0  
date Sep 21 2006 dfrq  
solvent CDC13 dn  
file exp dpwr 30  
ACQUISITION dot 0  
stfrq 400.029 dm  
in HI dm  
at 3.000 dmf  
np 35992 wtfile  
sw 5998.8 proc  
fb 3400 ft  
bs 4 not used  
tpwr 63  
pw 7.1 weft  
ql 4.000 wexp  
tof 1.000 wds  
ns 18 wnt  
ct 18  
alock n  
gain not used  
flags n  
il n  
in n  
dp y  
DISPLAY -21.3  
sp -21.3  
wp 3231.8  
vs 66  
sc 0  
wc 250  
hzmm 12.93  
is 3747.97  
rfl 4102.7  
rfp 3088.2  
th 7  
ins 1.000  
nm  
ph

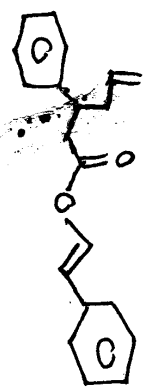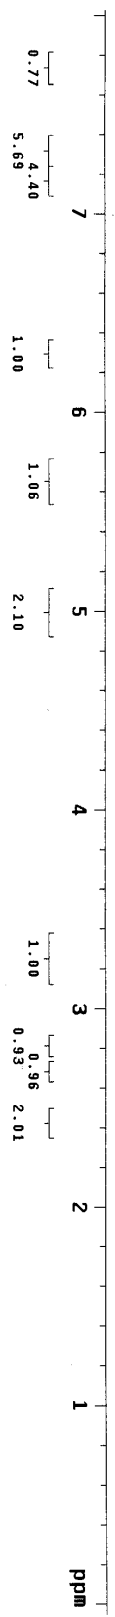

Js4-179c01

exp2 std13c

SAMPLE DEC. & VT 400.029  
date Sep 21 2006 dfrq 400.029  
solvent CDCl3 dn H1  
title exp dfr 45  
ACQUISITION exp dfr 0  
sfrq 100.519 gm yyy  
at 0.640 dmf  
np 32876 dmf  
sw 25683.4 lb PROCESSING 8617  
tb 14200 wfile 2.00  
bs 4 proc  
tpwr 57 fn not used  
pw 8.7  
d1 4.000 weff  
tof 2271.7 weff  
te 614.0 wds  
ce 140 wnt  
clock 1 n  
gain not used  
flags  
11 n  
in n  
dp y  
SP DISPLAY  
wp -104.8  
s 23018.9  
s 18.2  
wc 250  
hzmm 92.07  
is 500.00  
rf1 8827.4  
rfp 7745.2  
th 20  
ins 100.000  
nm no ph

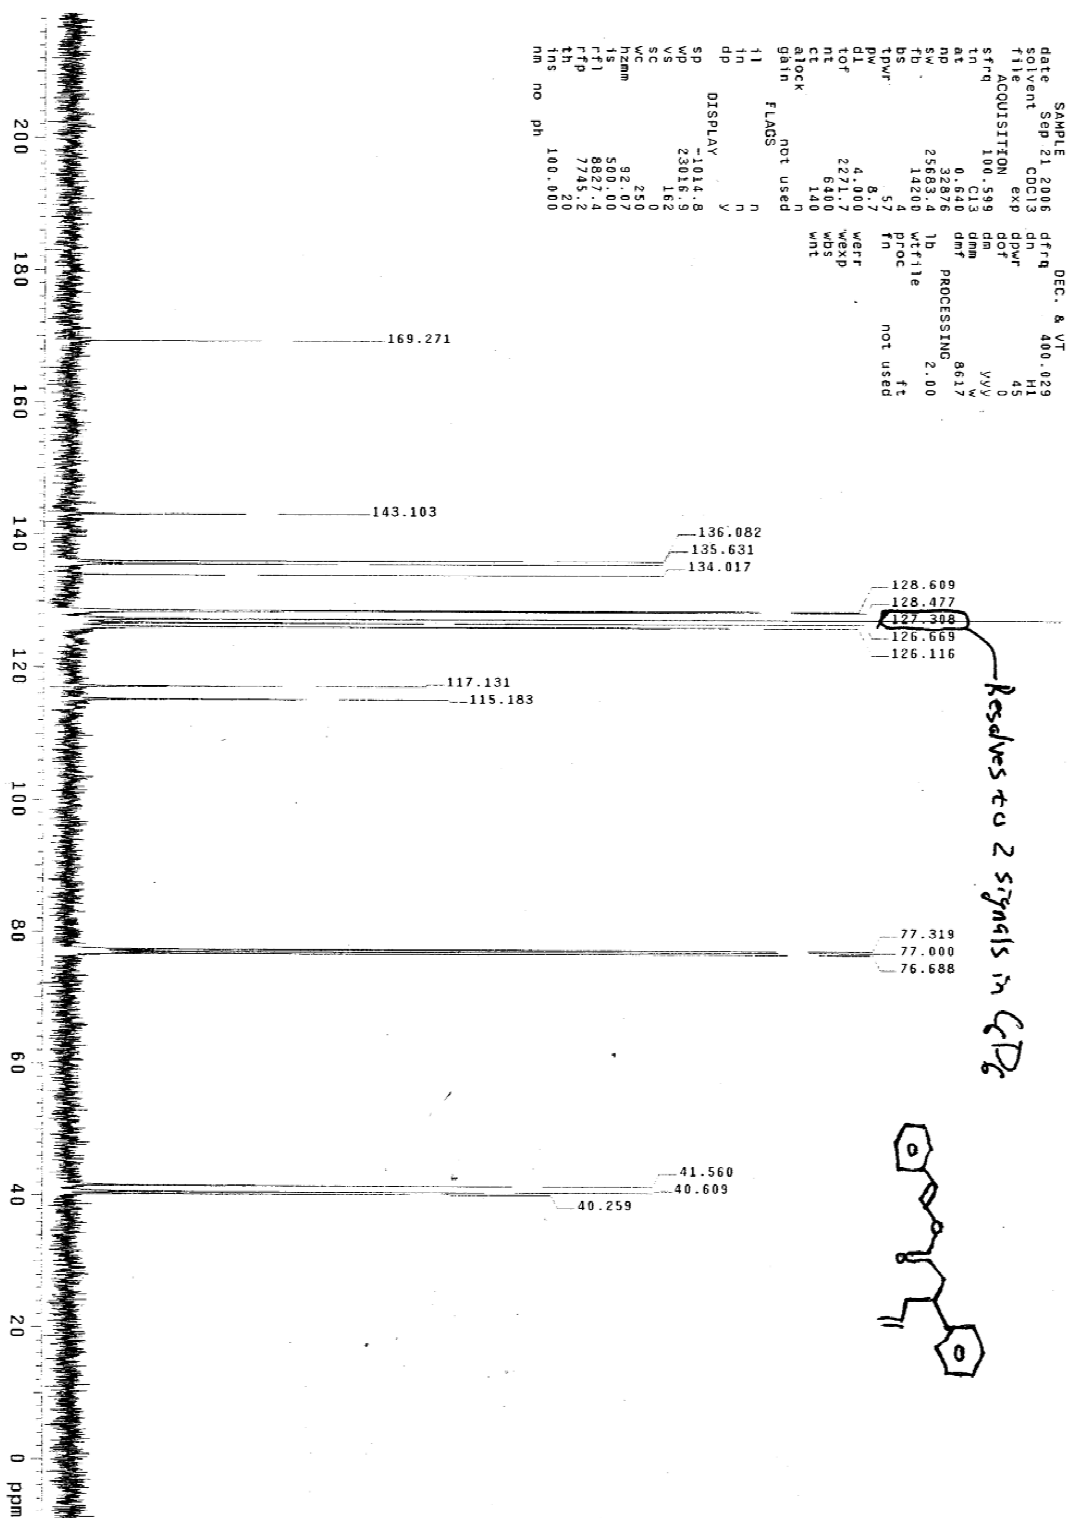

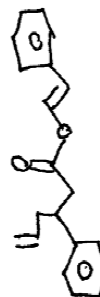

# STANDARD CARBON PARAMETERS

exp8 s2pu1

SAMPLE 9 2007 DEC. & VT 499.784

date Jan Benzene dn H1

solvent exp 39

file exp 0

ACQUISITION 125.633 dm

strq 125.633 dm

tn C13 dm

at 3.008 dm

np 3.00156 dm

z 3.00156 dm

7b 18000 Hz

bs 4 temp

tdwr 54 DEC2 25.0

dl 7.0 dfq2 0

dl 2.000 dn2

tof 818.6 dpr2 1

nt 48000 dpr2 0

ct 1054 dpr2 0

clock 1054 dpr2 0

gain not used

FLAGS

11 n dress 1.0

in n homo2

dp y lb PROCESSING 1.00

ns DISPLAY nm wtitle

sp -180.8 proc ft

wp 22835.8 tn not used

sc 189 math f

hzm 256 weff

hzm 91.36 weff

hzm 500.00 weff

hzm 19998.0 wnt

hzm 16134.8 wnt

hzm 100.000 wnt

nm cdc ph

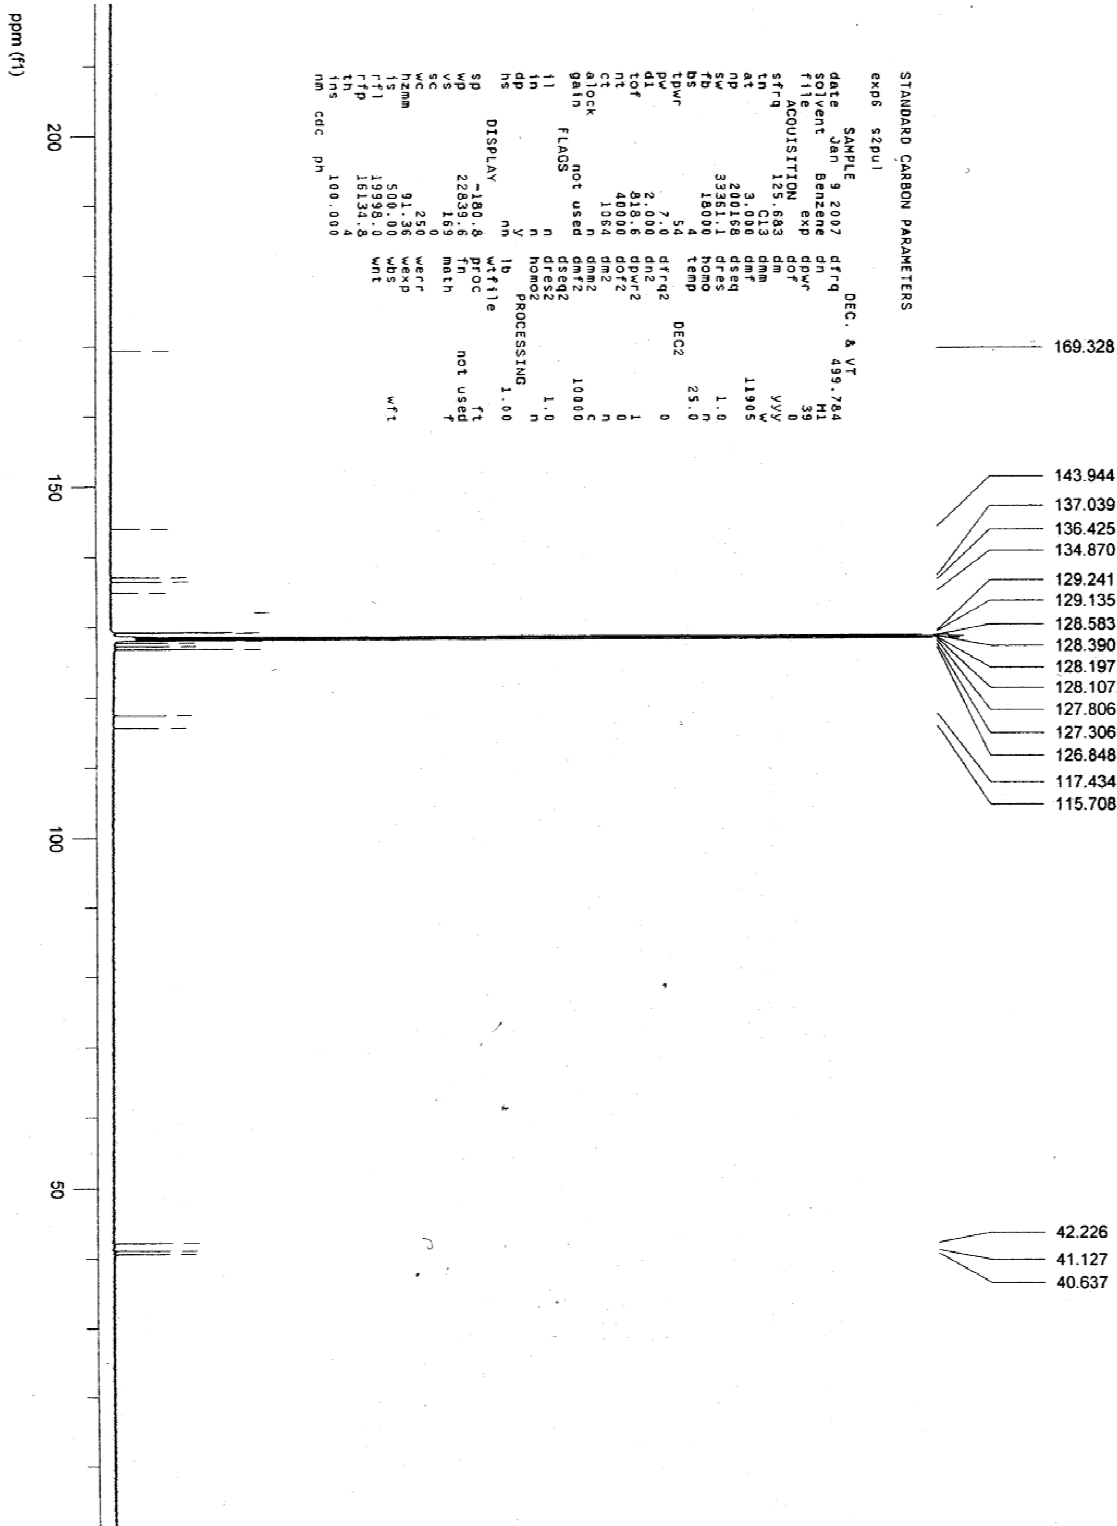

Supplement: Supplementary file 1 [file 4722889]
